# Supplementary material for: Reduction in nutritional quality and growing area suitability of common bean under climate change induced drought stress in Africa
Source: PubMed Central journal article supplement (PMC6212502; doi:10.1038/s41598-018-33952-4), 2018-11-01

## Supplementary Figures

### **Reduction in nutritional quality and growing area suitability of common bean under climate change induced drought stress in Africa**

Marijke Hummel<sup>1</sup>, Brendan F. Hallahan<sup>1</sup>, Galina Brychkova<sup>1</sup>, Julian Ramirez-Villegas<sup>2</sup>, Veronica Guwela<sup>1</sup>, Bartholomew Chataika<sup>3</sup>, Edna Curley<sup>1</sup>, Peter C. McKeown<sup>1</sup>, Liam Morrison<sup>1</sup>, Elise Talsma<sup>2</sup>, Steve Beebe<sup>2</sup>, Andy Jarvis<sup>2</sup>, Rowland Chirwa<sup>3</sup>, and Charles Spillane<sup>1,\*</sup>

## Supplementary Figure Legends

**Supplementary Figure 1** | Rainfall and temperature data during crop growing period across rainfed (Season 1 and 3) and drought (Season 2 and 4) conditions. Source: Chitedze weather station.

**Supplementary Figure 2** | Present-day drought season weather conditions mimics future bean growing season weather conditions. Using MarkSim standalone V.2 software two weather scenarios were simulated in Malawi for the year 2095. Under RCP 8.5 the months of March, April and May (bean growing season) will experience an average rainfall and temperature similar to that recorded in our field trials. (a) Ensemble of 7 of the most highly cited (>400 citations) General Circulation Models (GCMs). (b) Ensemble of all 17 GCMs.

**Supplementary Figure 3** | Box and whisker plot showing average grain yield of 20 common bean varieties grown under rainfed and drought-stress conditions. 'X' indicates mean value.

\*\*\*  $P < 0.001$

**Supplementary Figure 4** | Percentage grain (A) Boron, (B) Sodium, (C) Magnesium, (D) Phosphorus, (E) Sulphur, (F) Potassium, (G) Calcium, (H) Titanium, (I) Chromium, (J) Manganese, (K) Copper, (L) Arsenic, (M) Rubidium, (N) Strontium, (O) Molybdenum, (P) Cadmium, (Q) Cobalt, (R) Nickel, (S) <sup>57</sup>Iron, (T) lead, (U) <sup>56</sup>Iron, (V) zinc, (W) phytic acid and protein (X) concentration change of each common bean variety under drought conditions relative to rainfed conditions.

**Supplementary Figure 5** | Scatterplot comparing combinations of Fe and Zn concentrations in the CIAT core collection of 1000 cultivated common bean accessions (black circles) with equivalent values for the twenty common bean varieties tested in this study under rainfed (green circles) or drought conditions (red triangles).

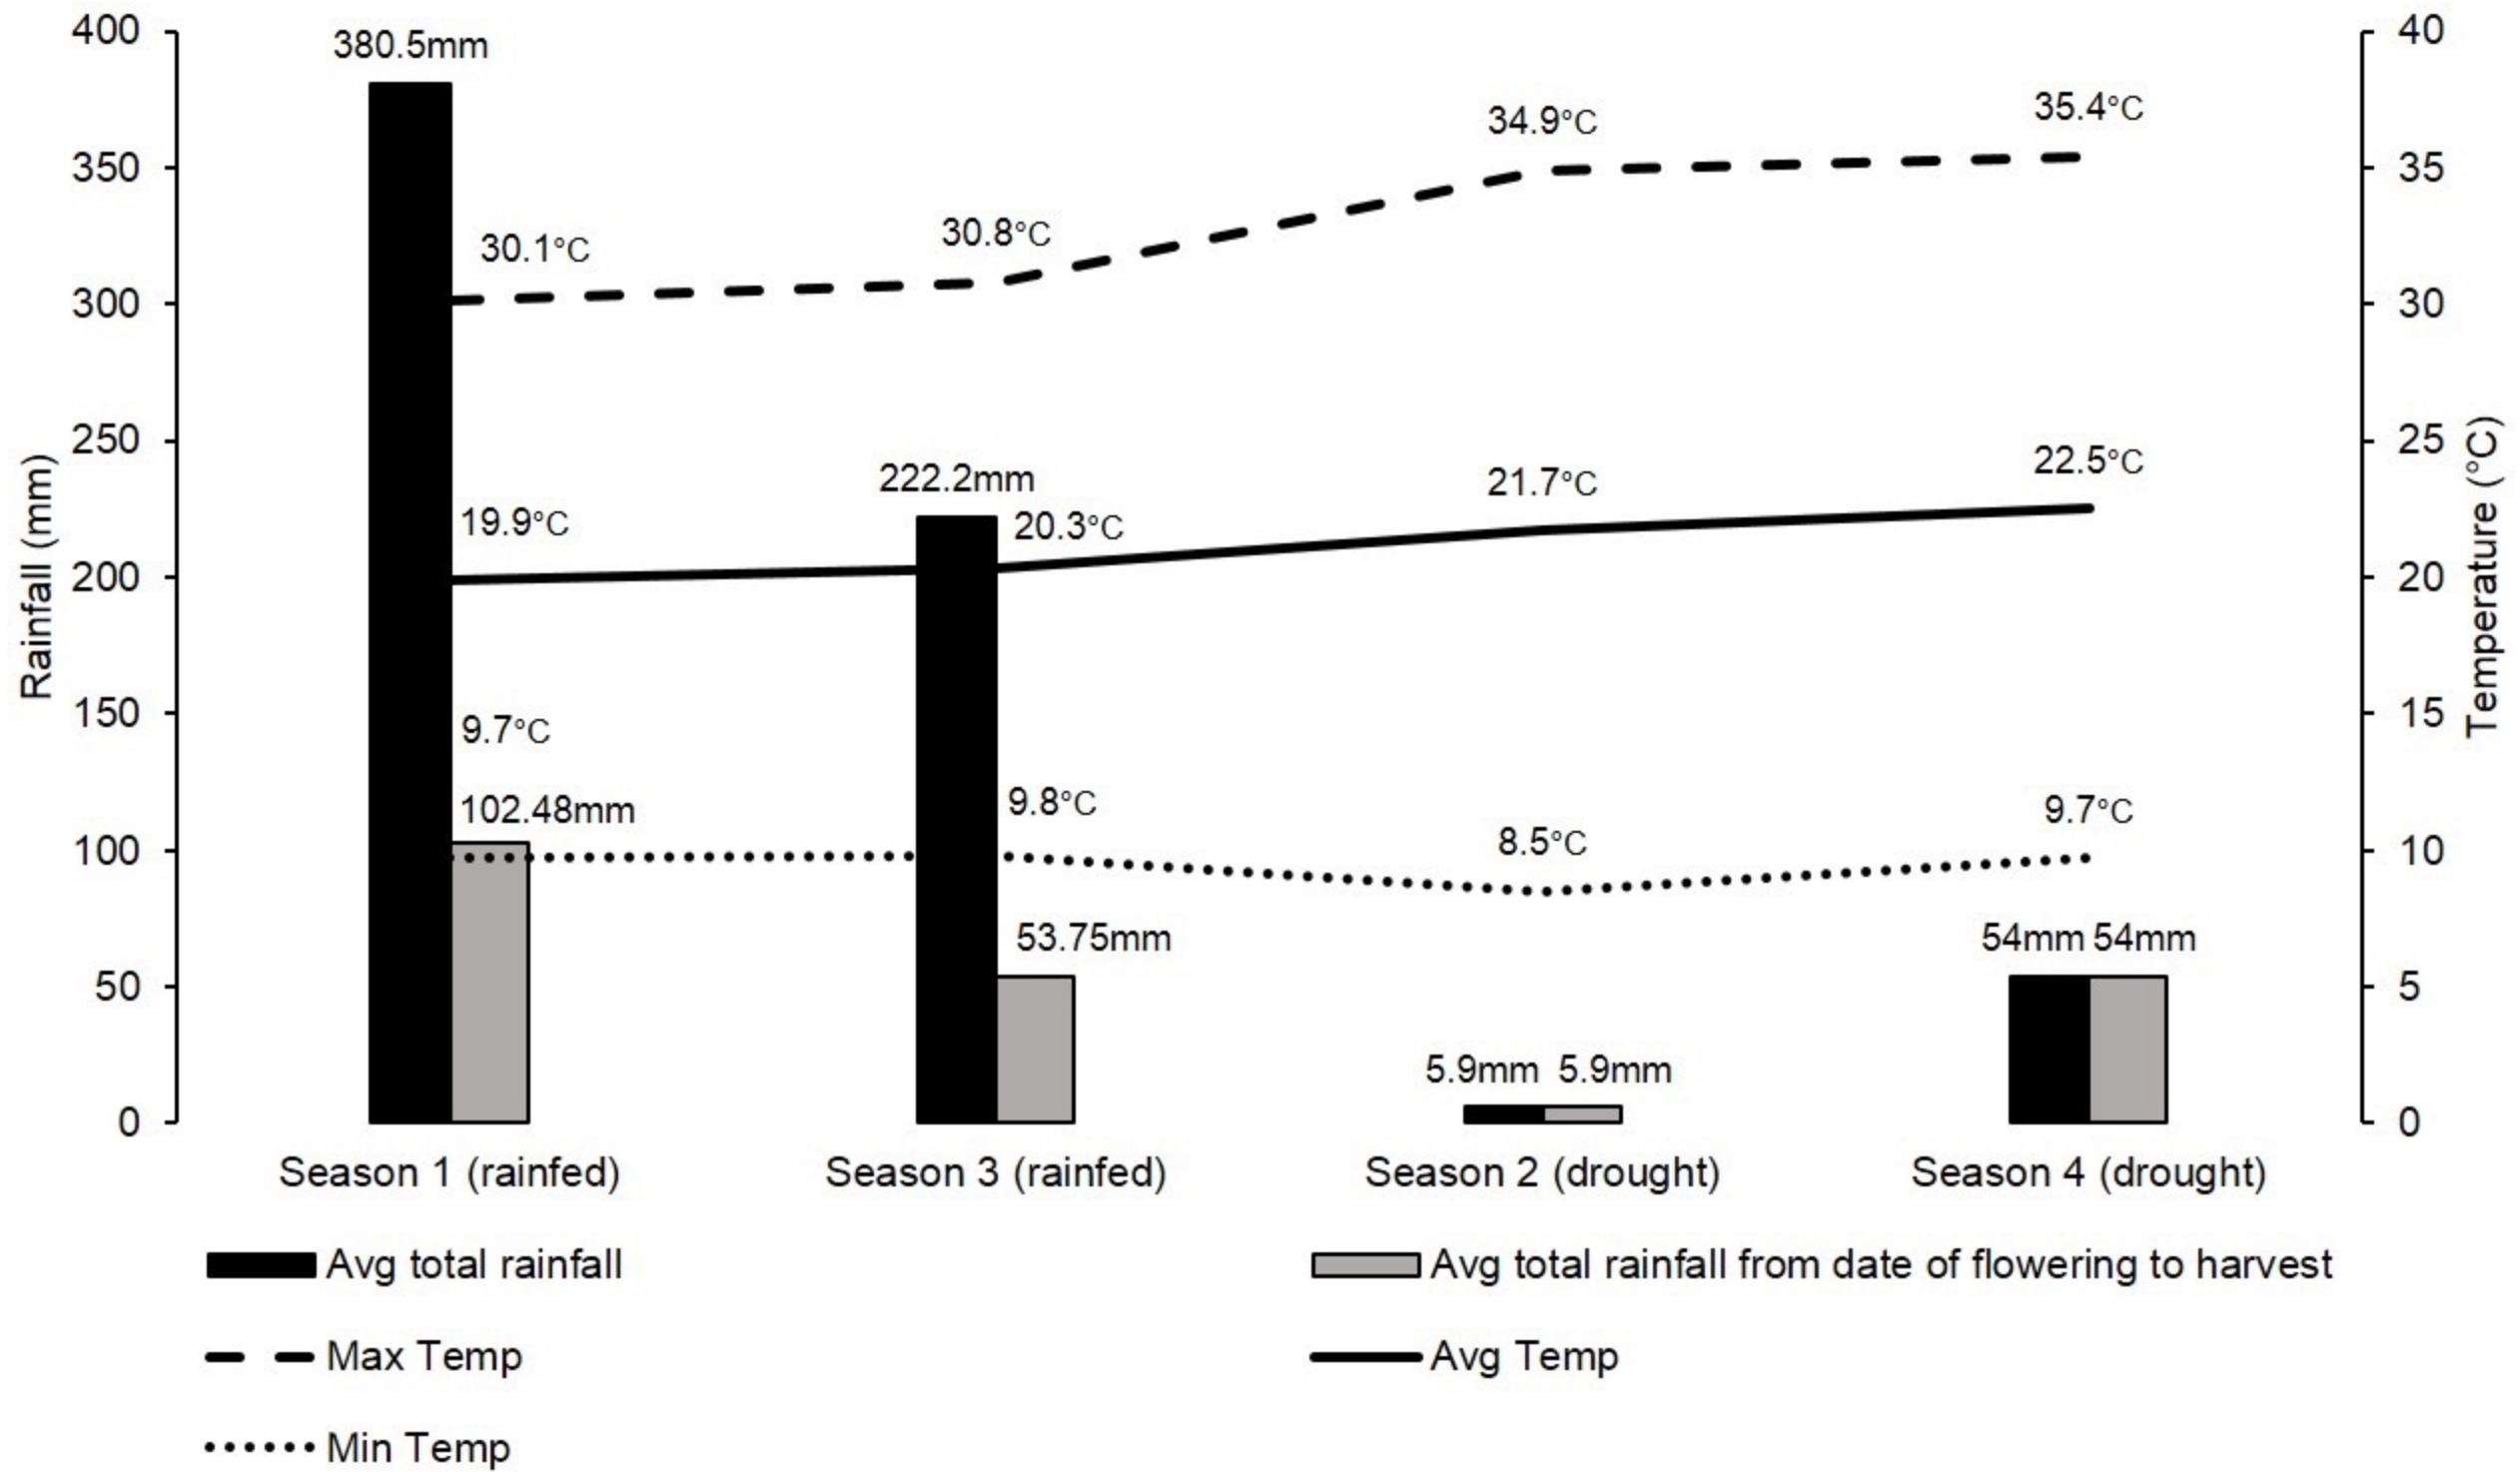

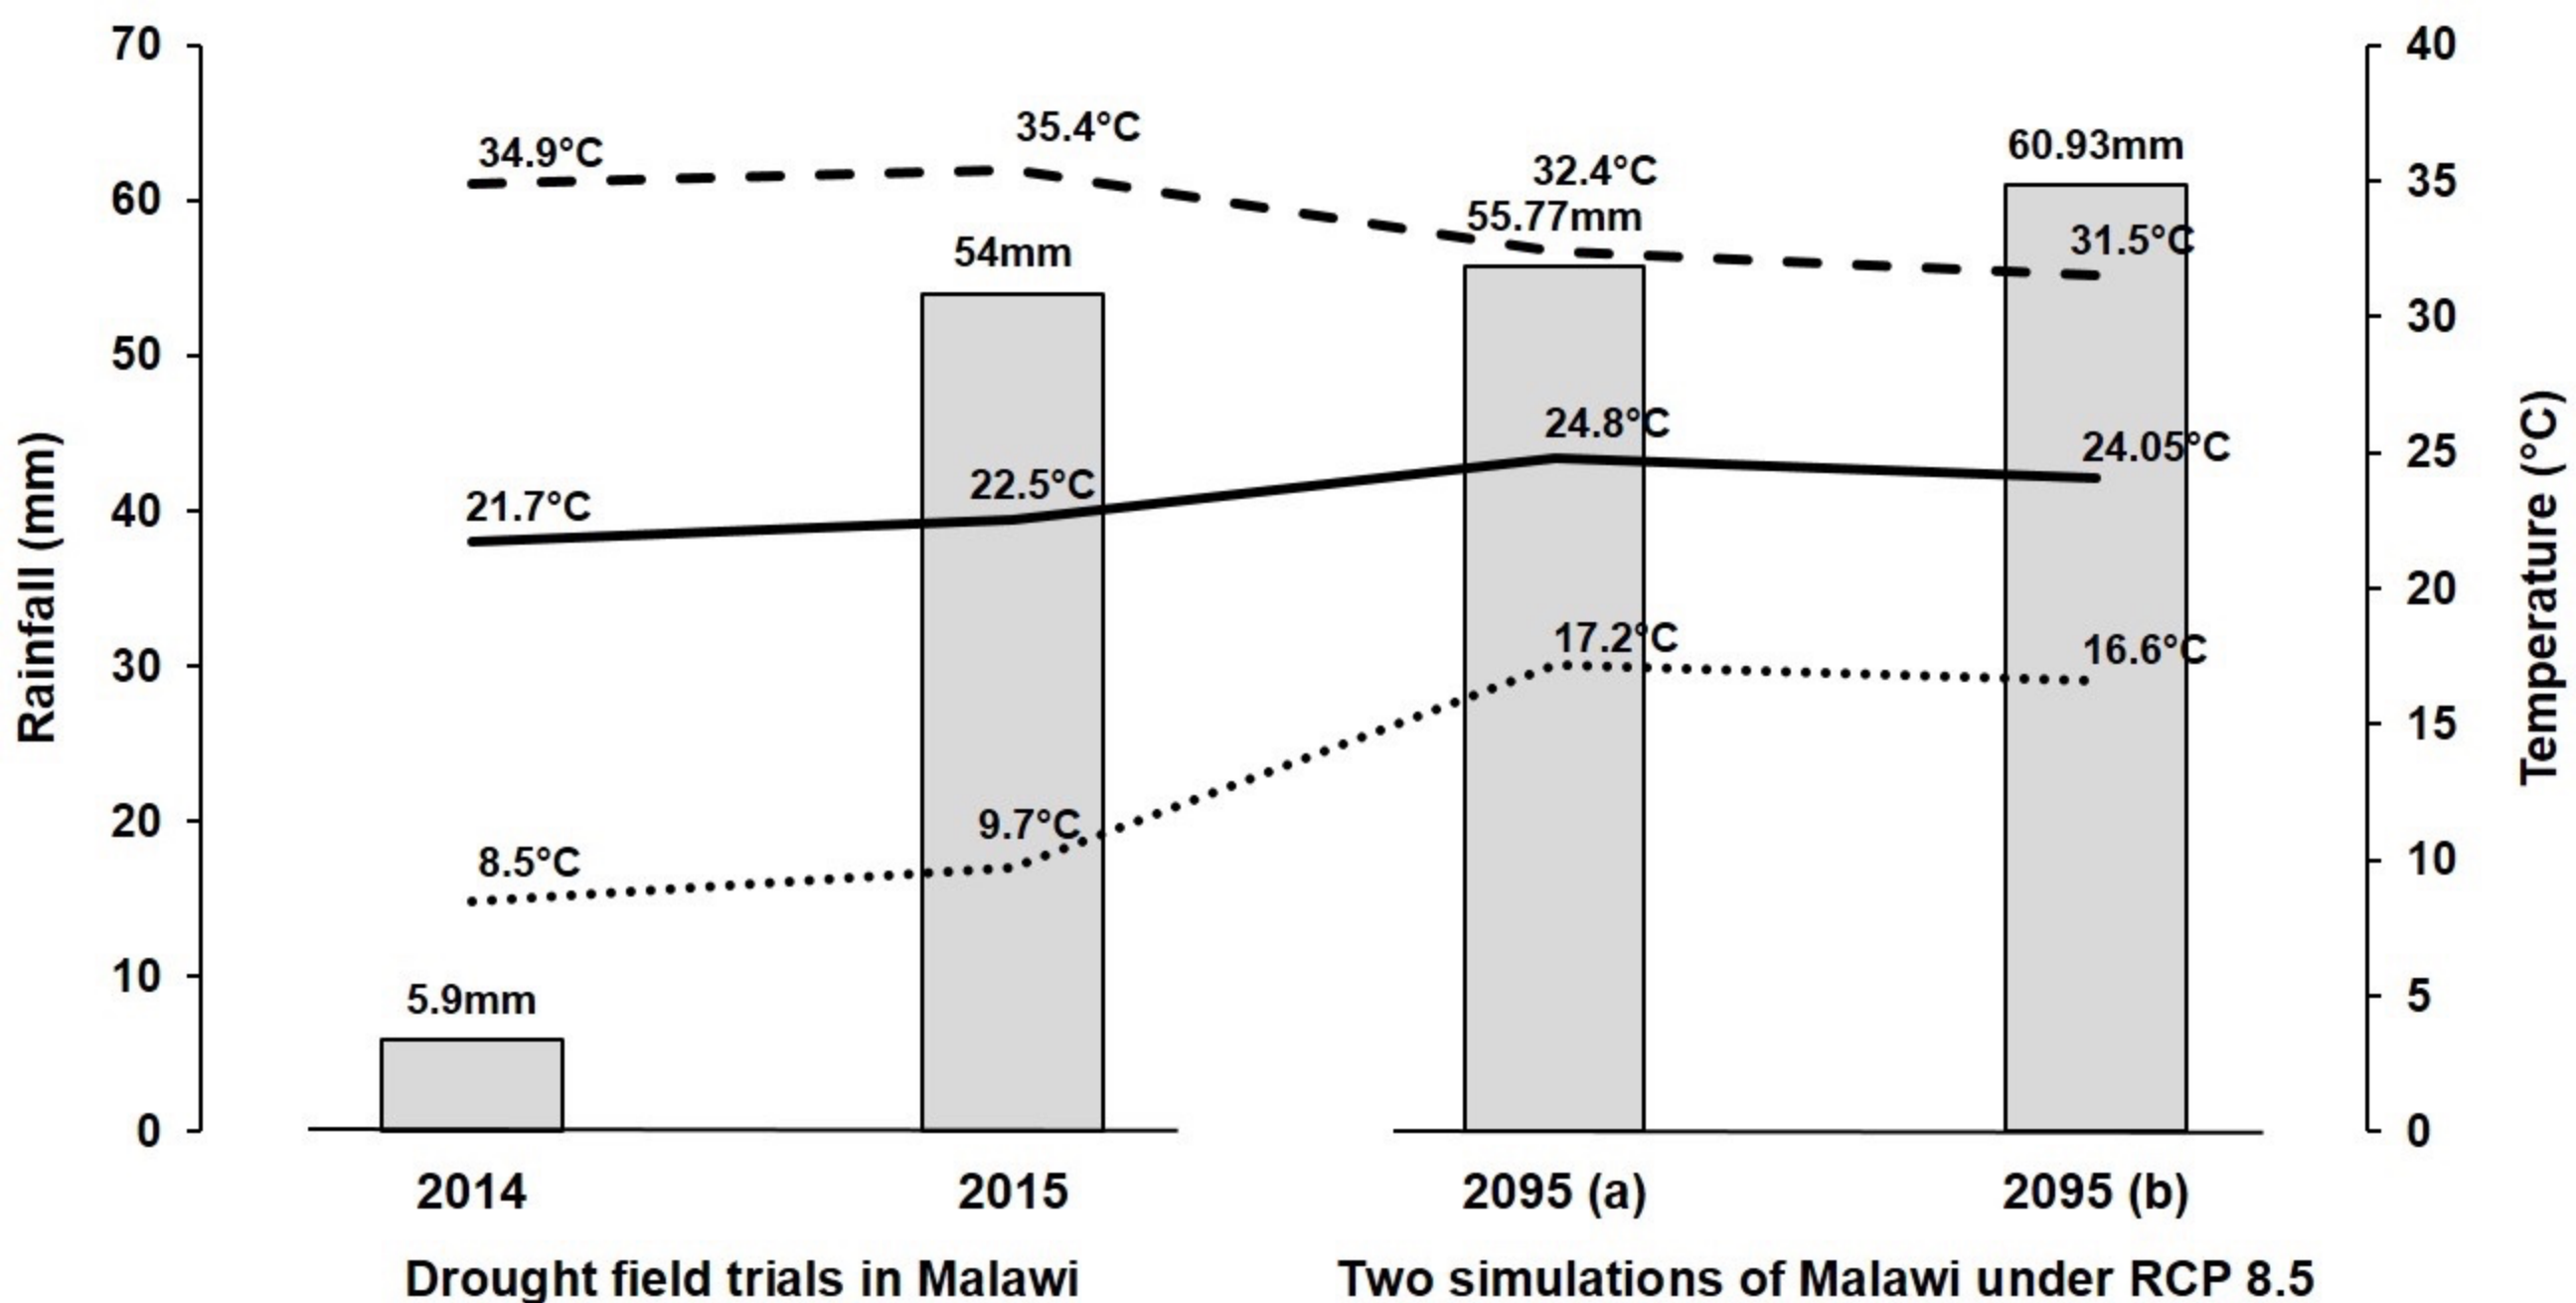

Avg total rainfall from date of flowering to harvest
  Max Temp
  Min Temp
  Avg Temp

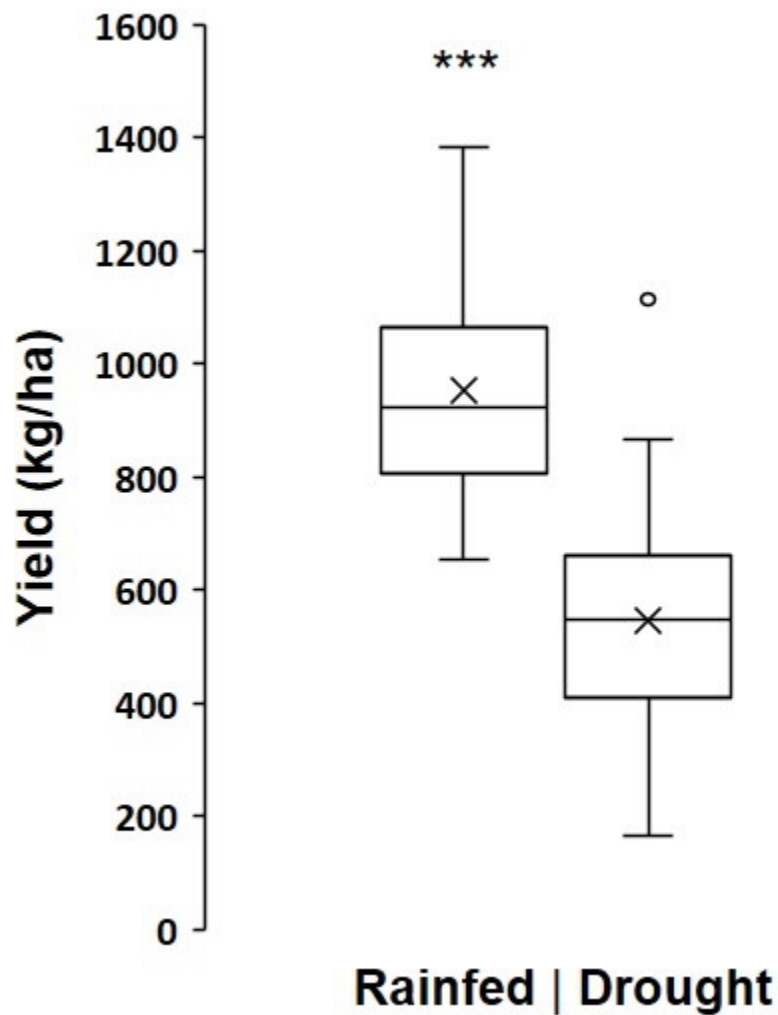

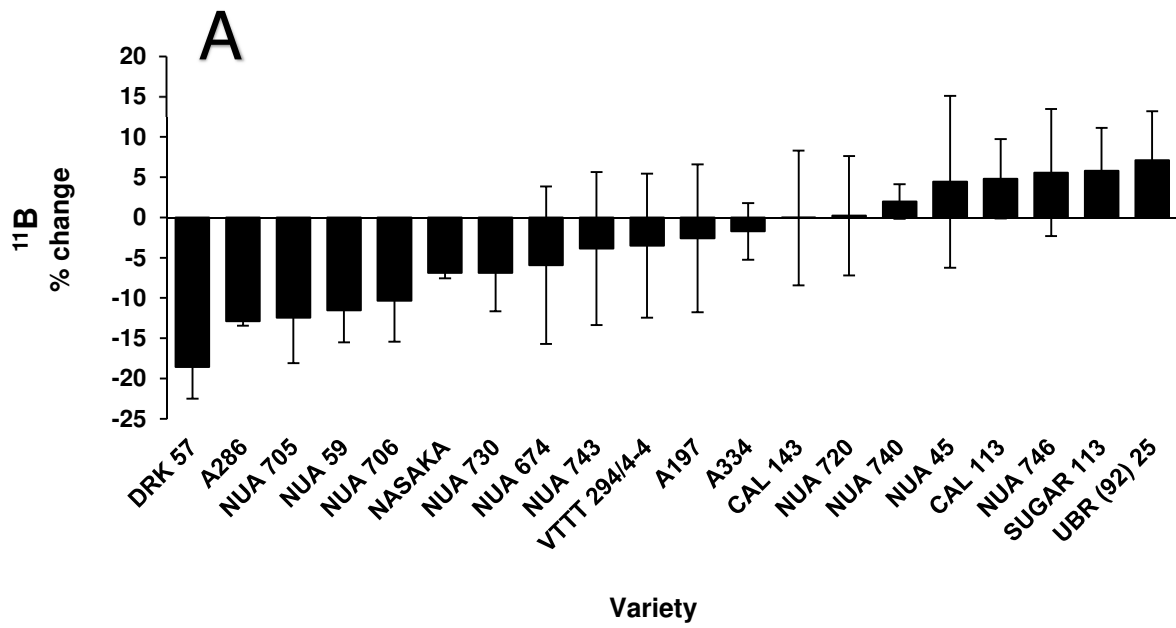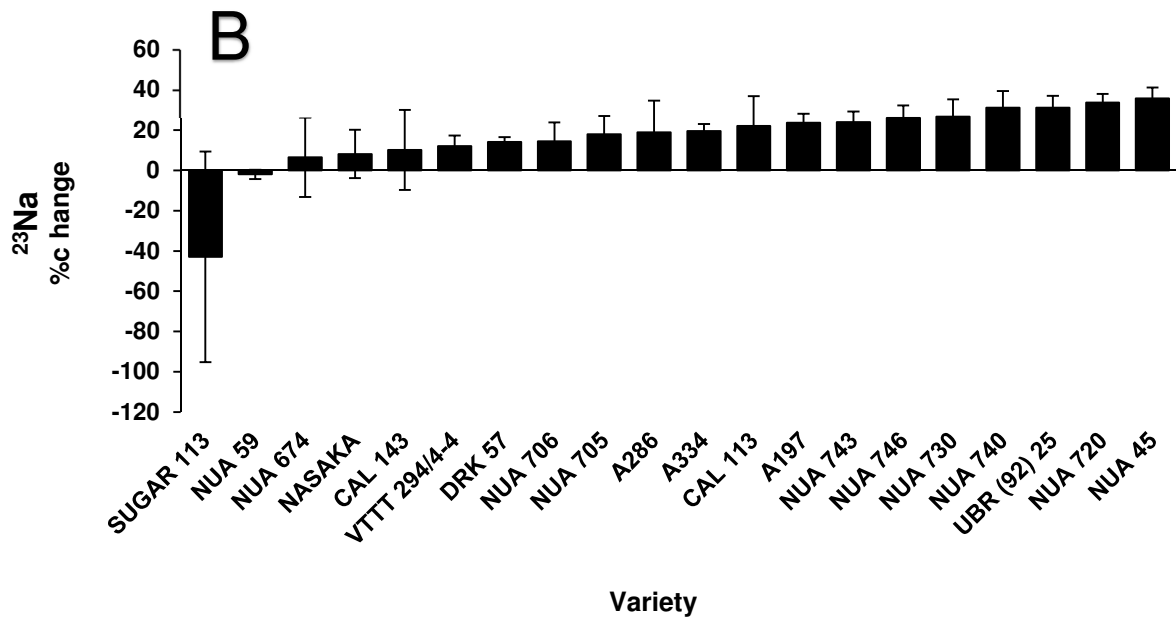

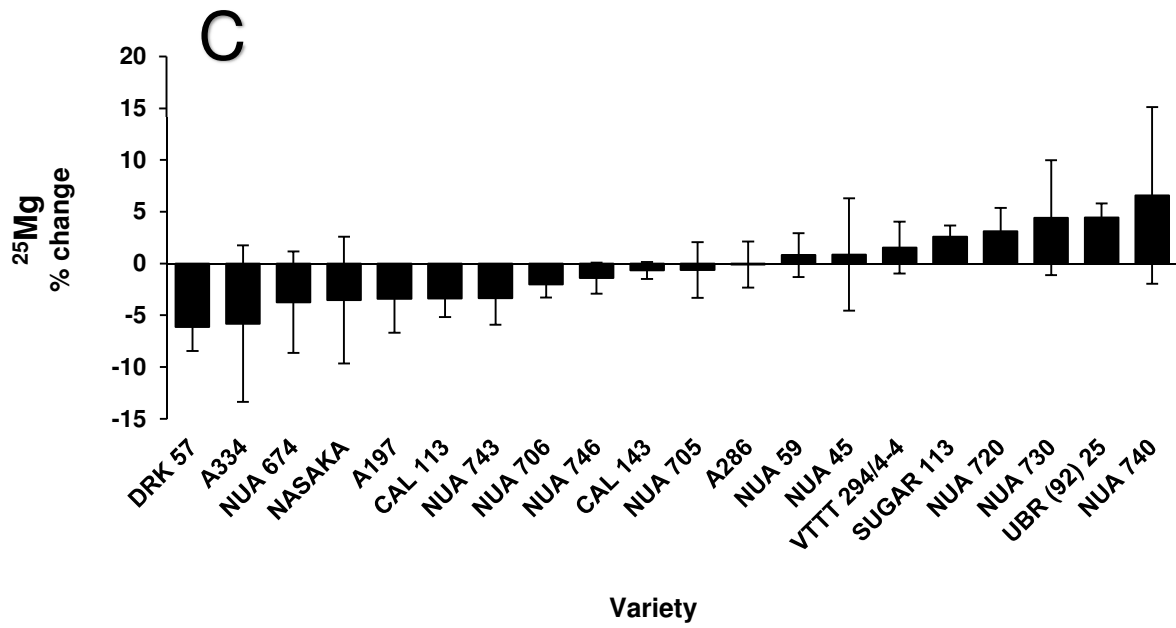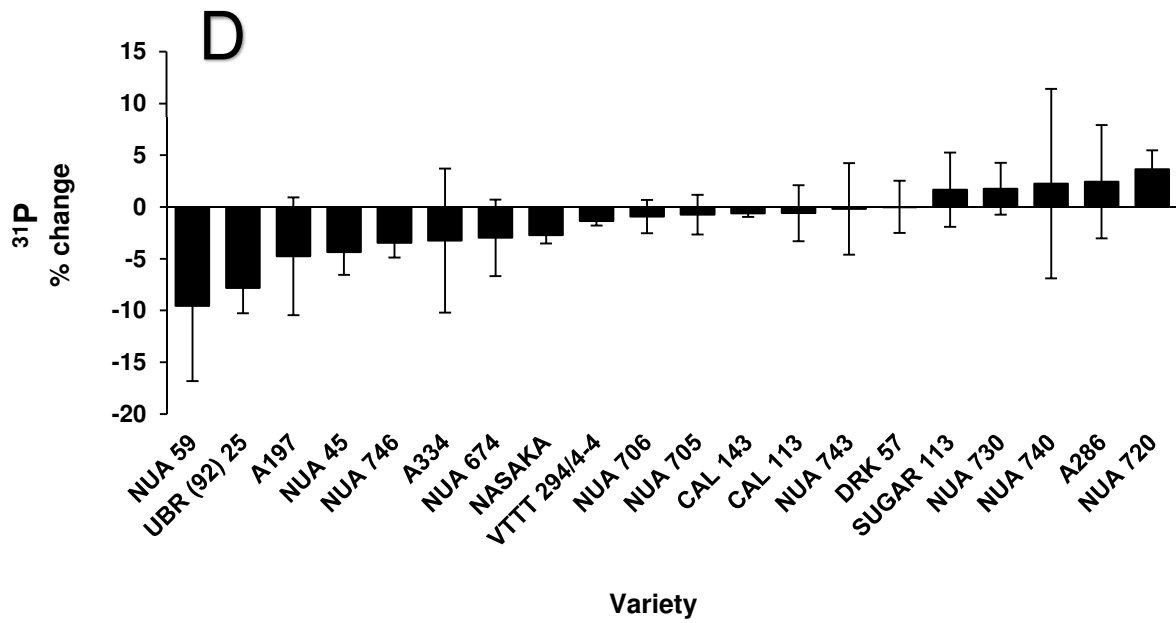

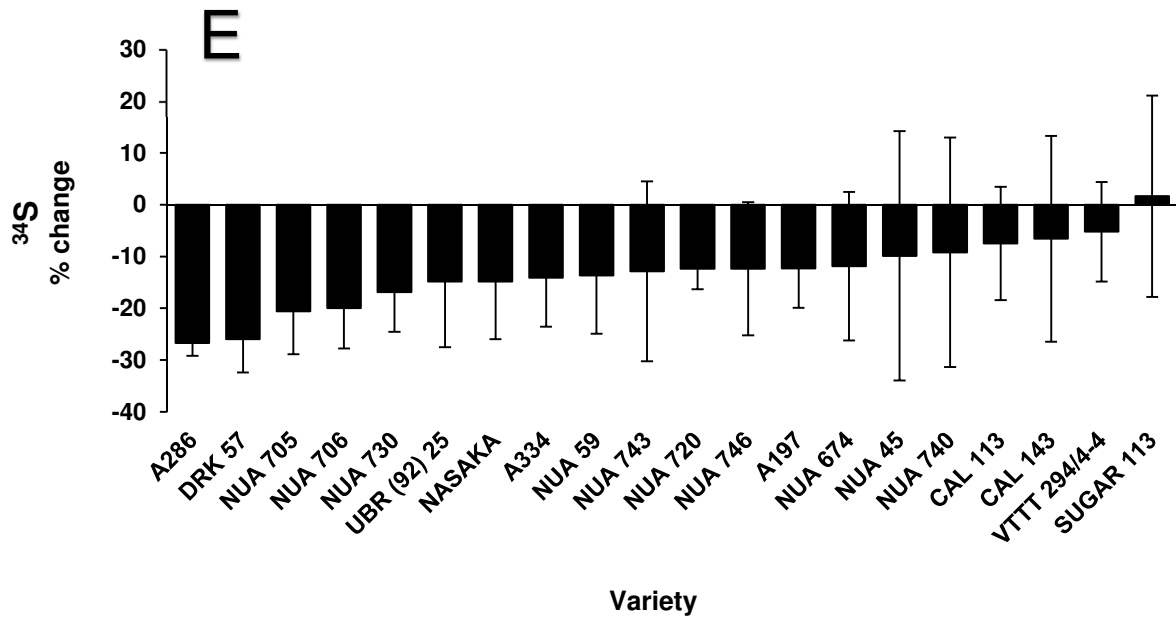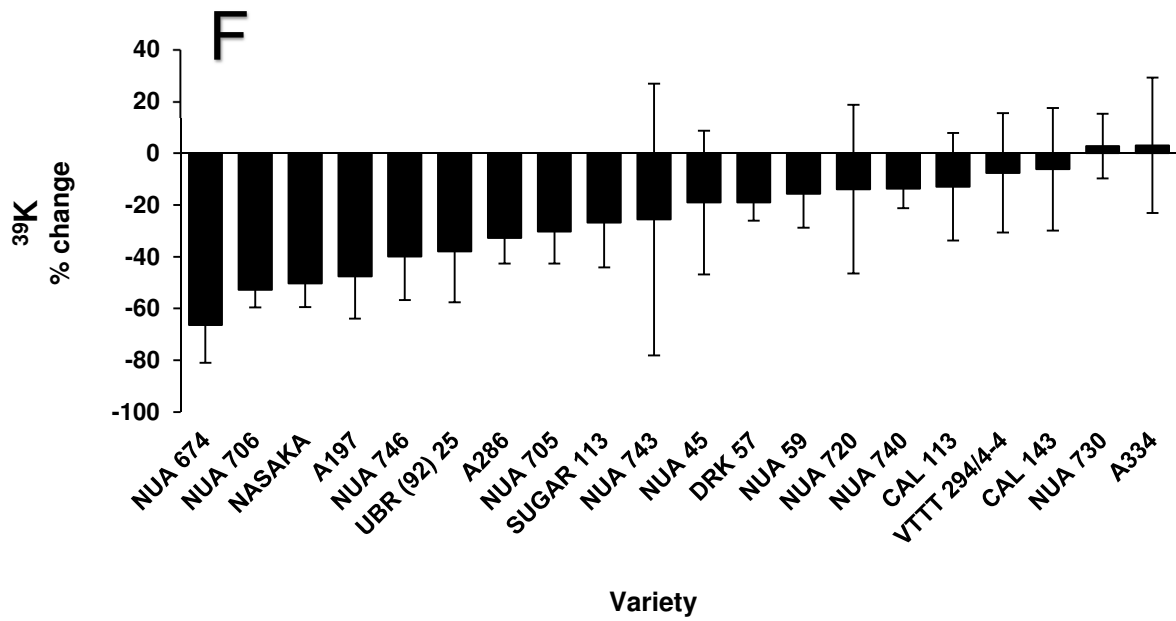



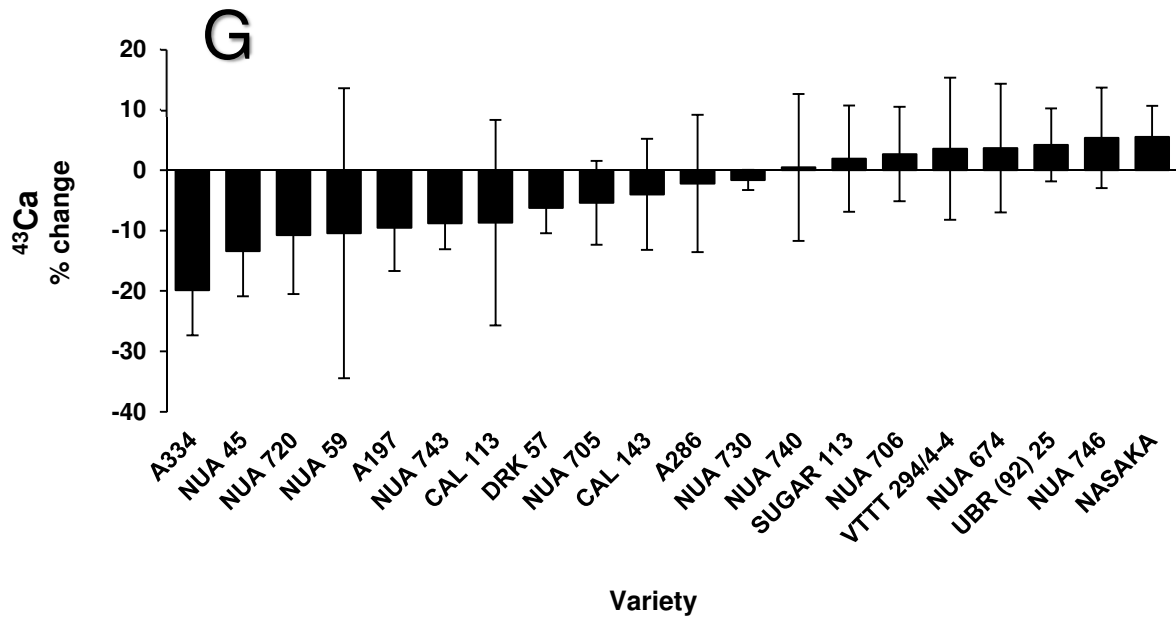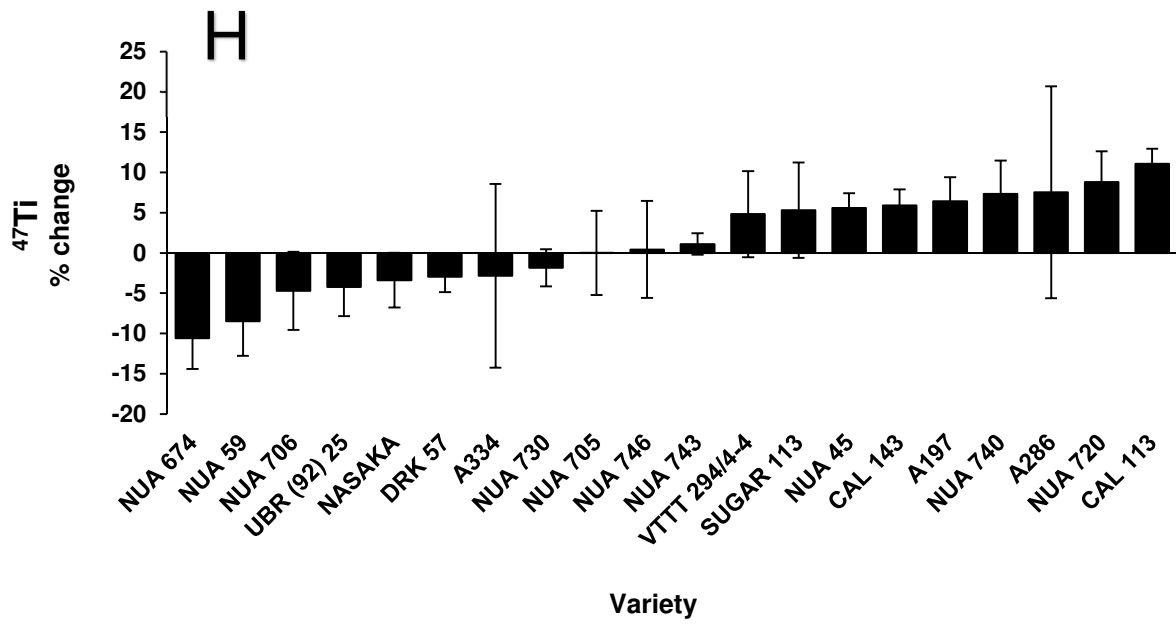

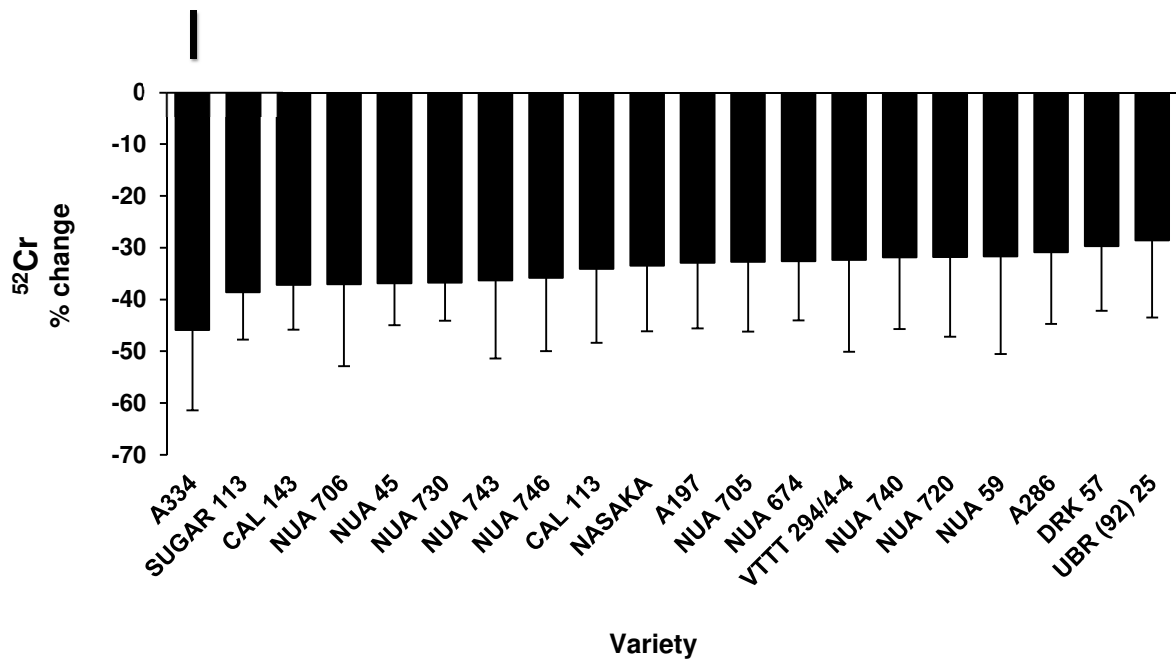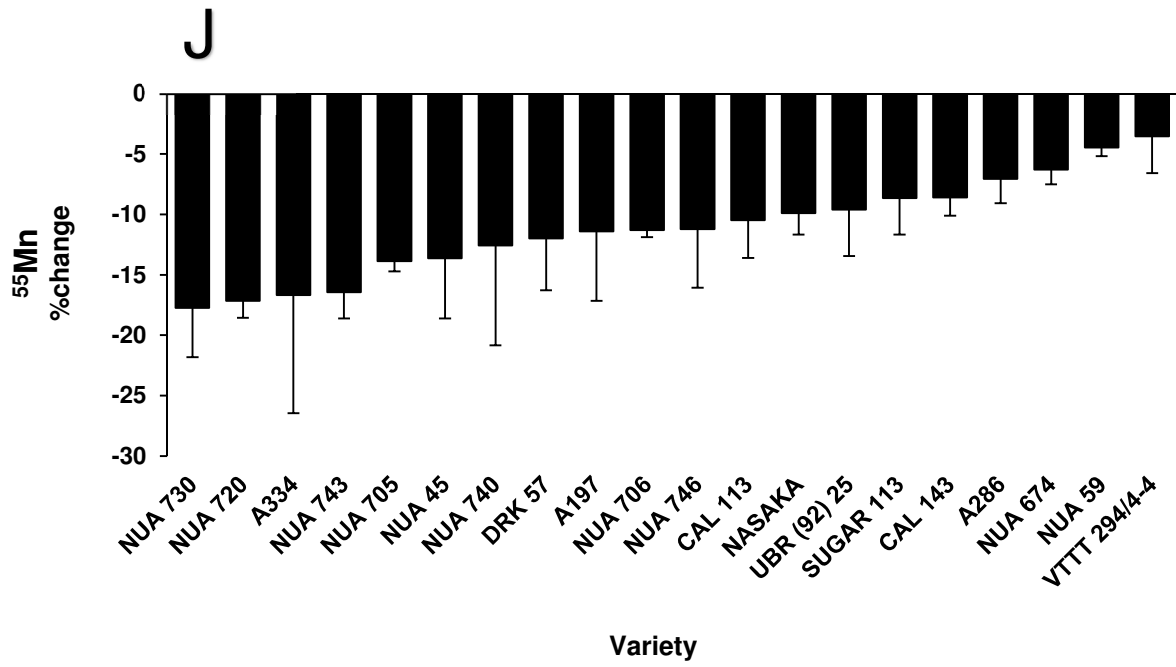

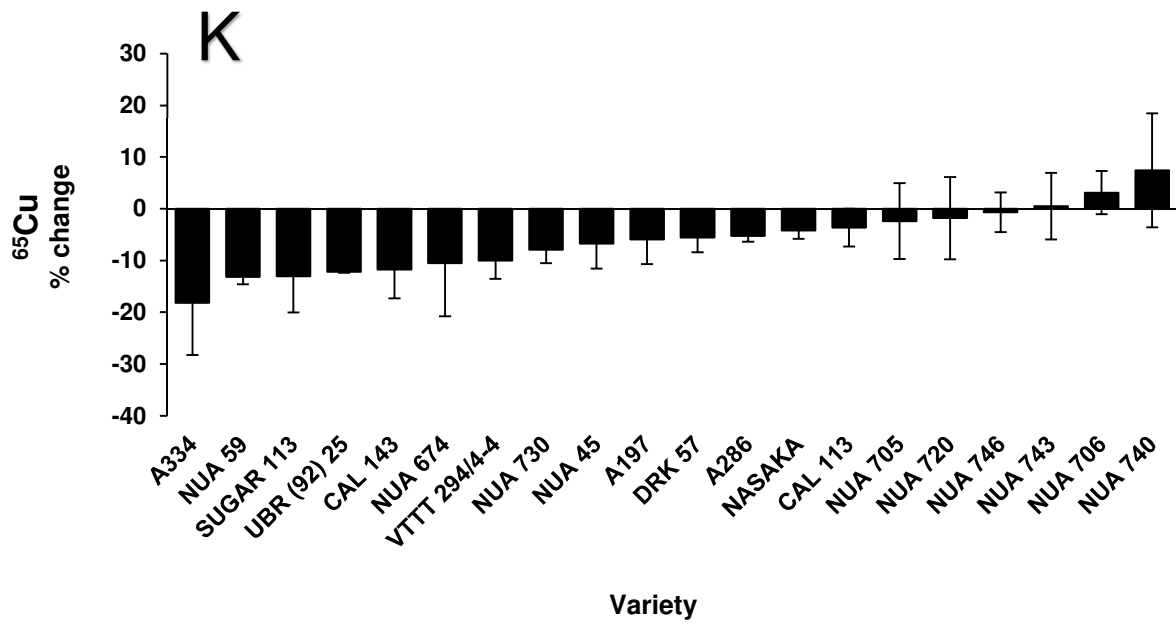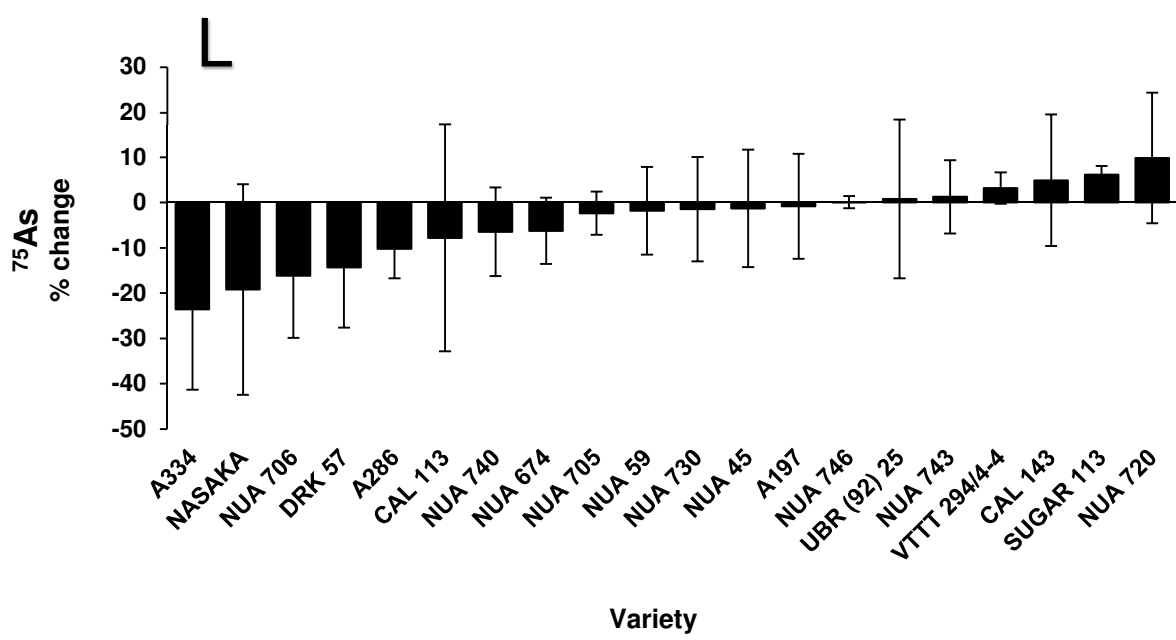

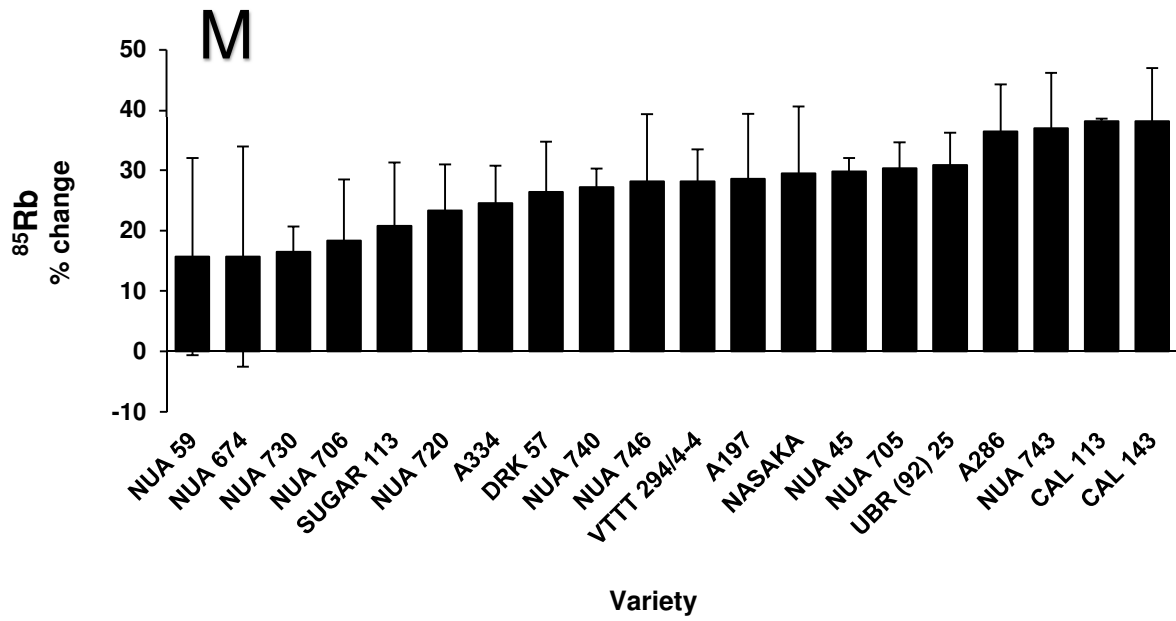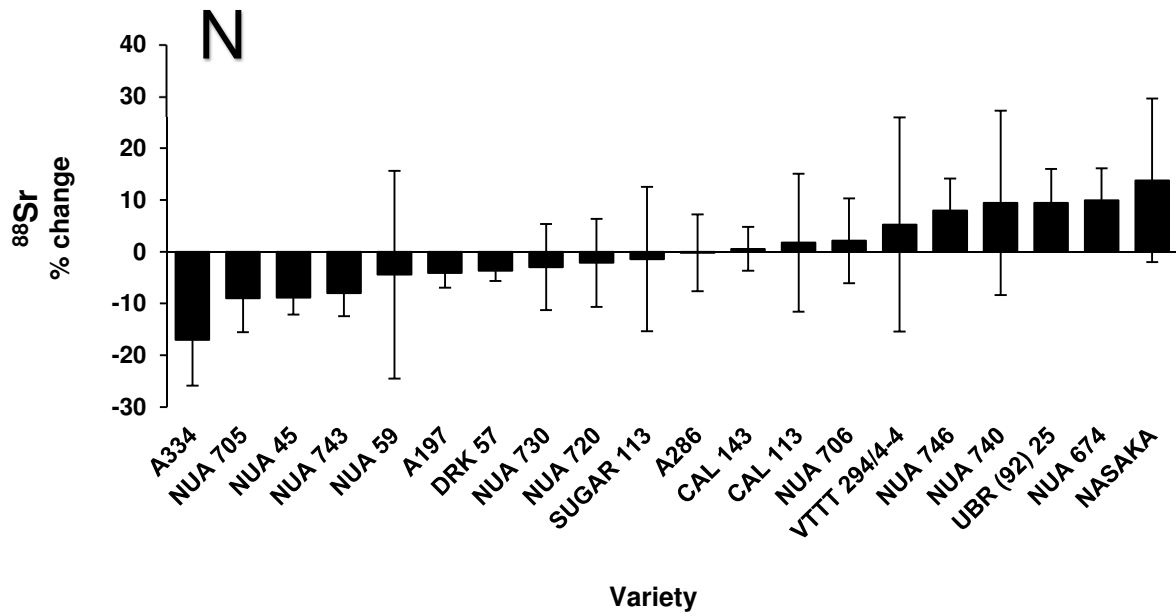

O

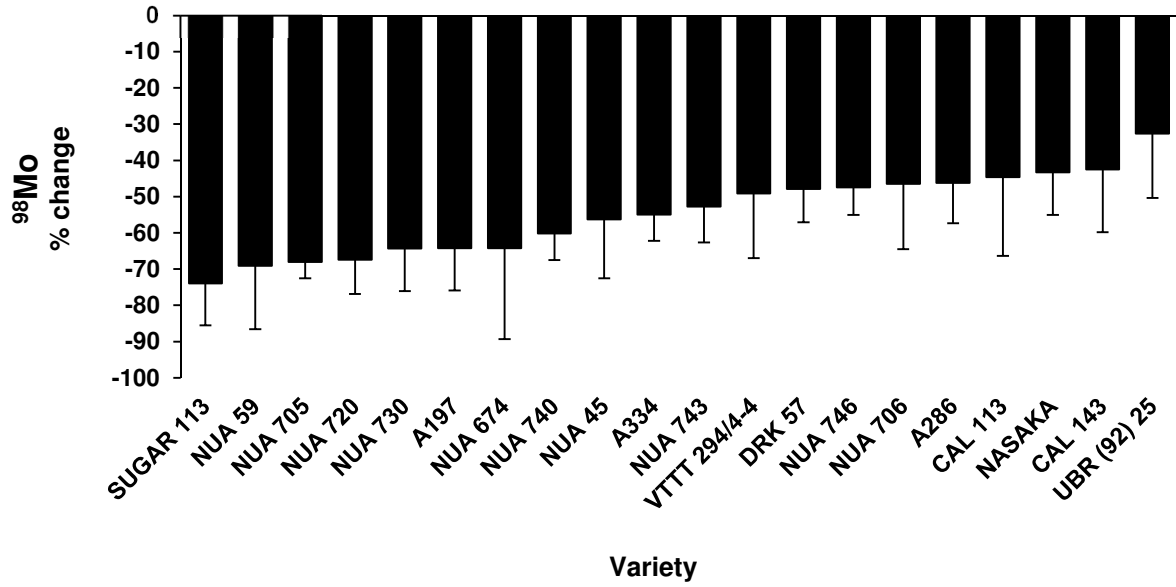

P

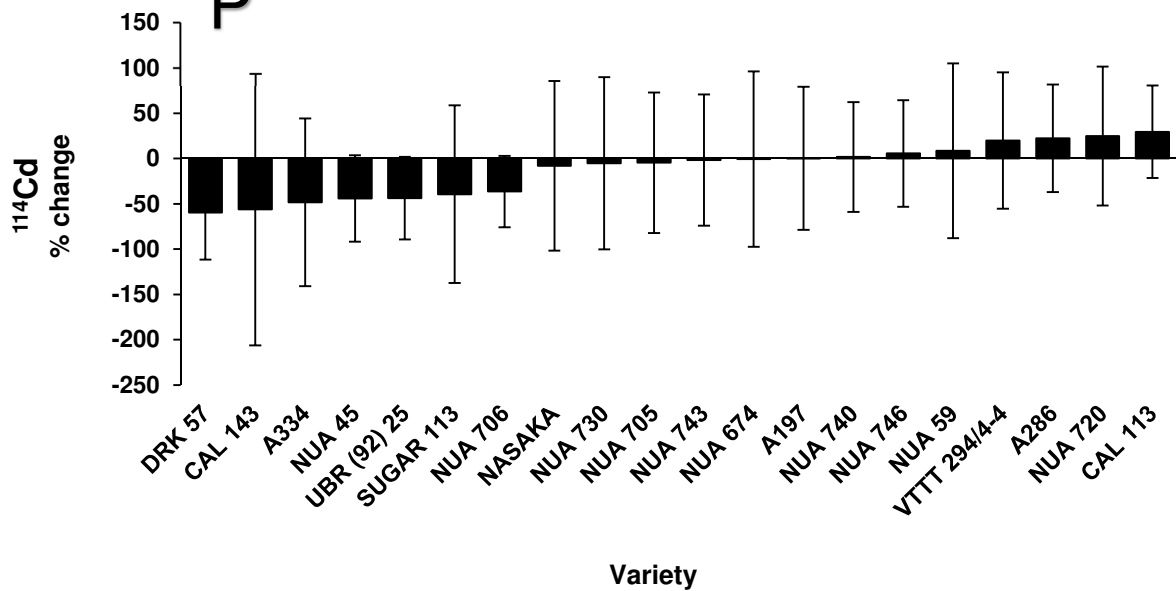

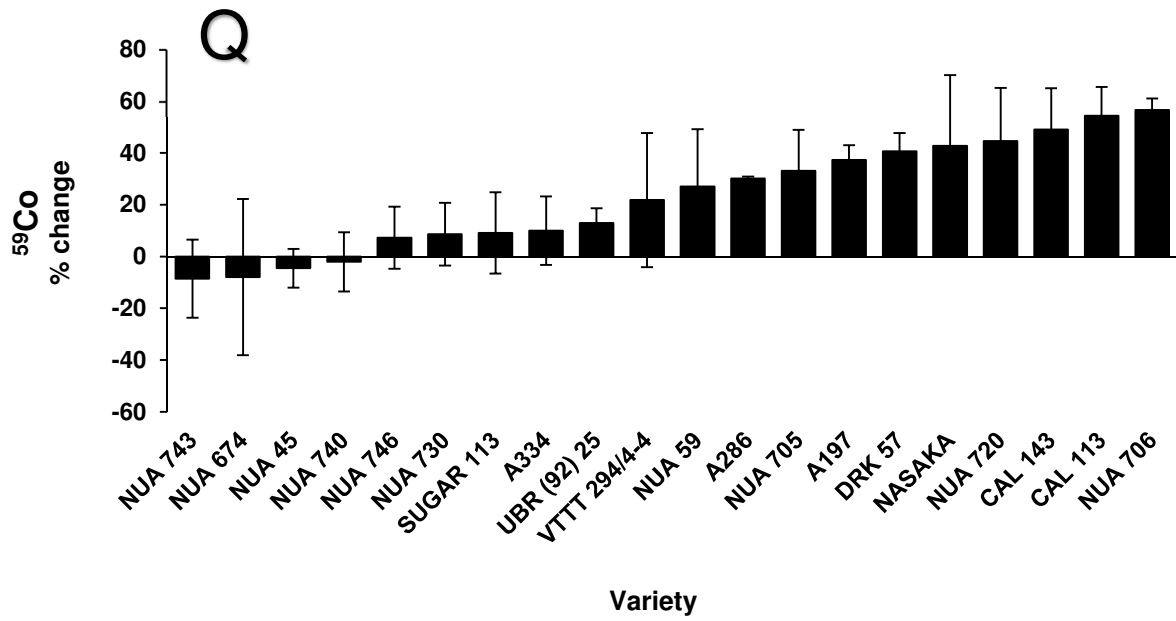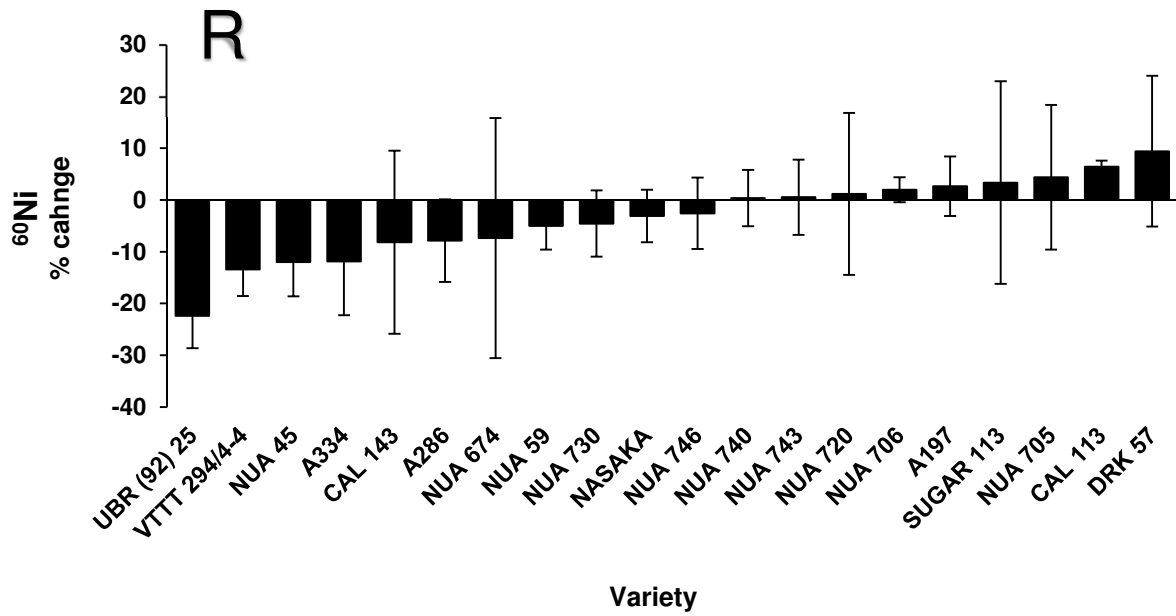

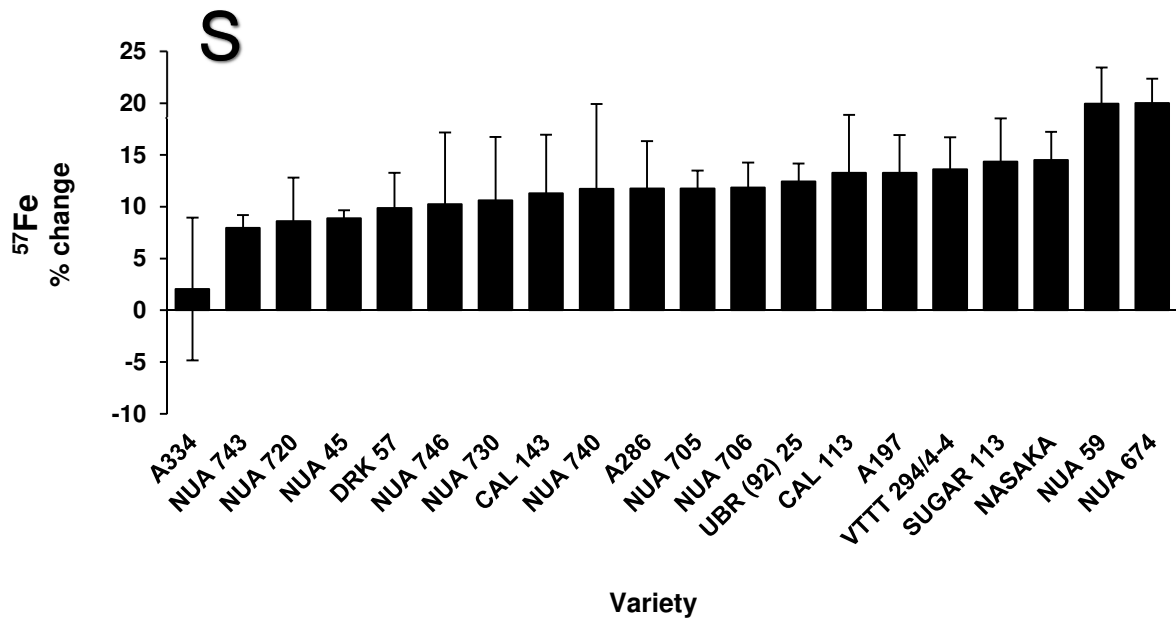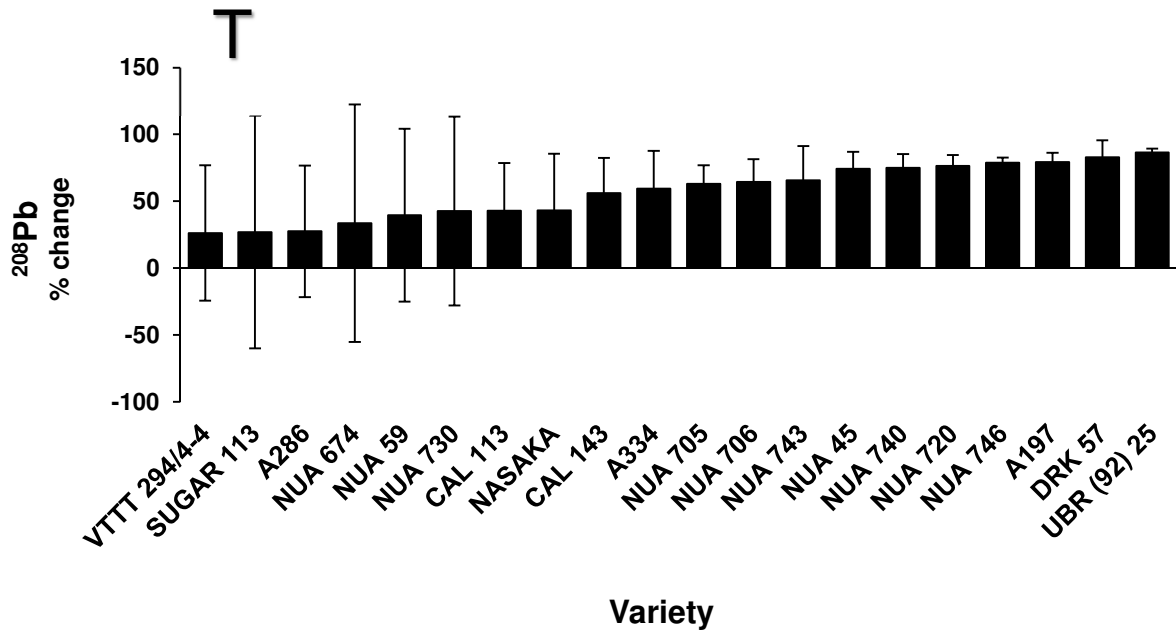

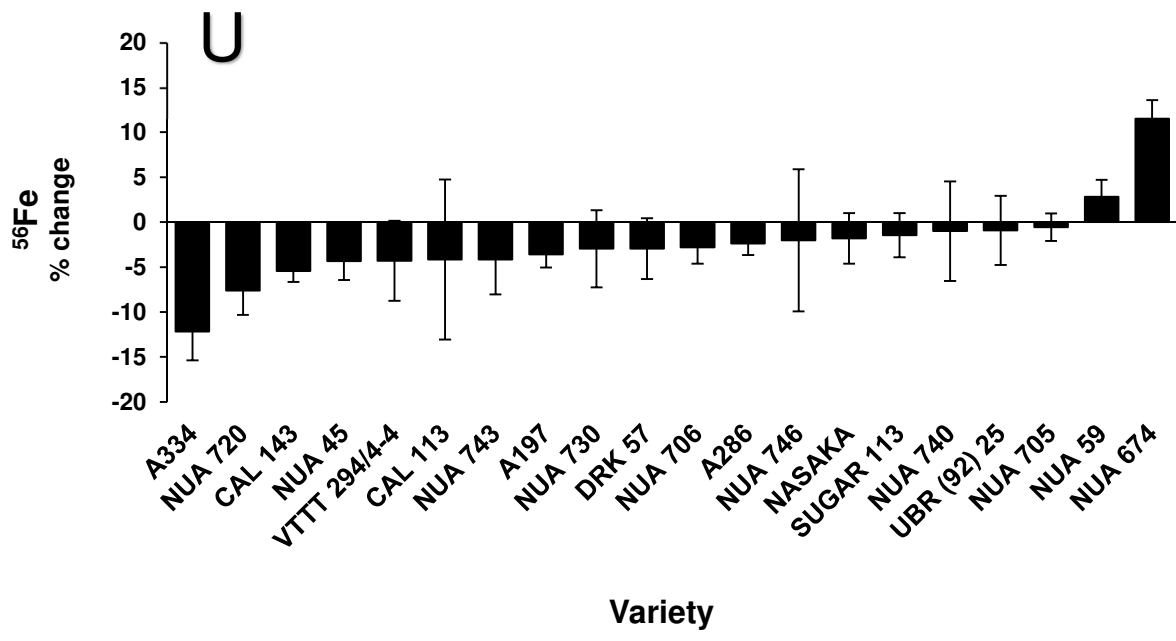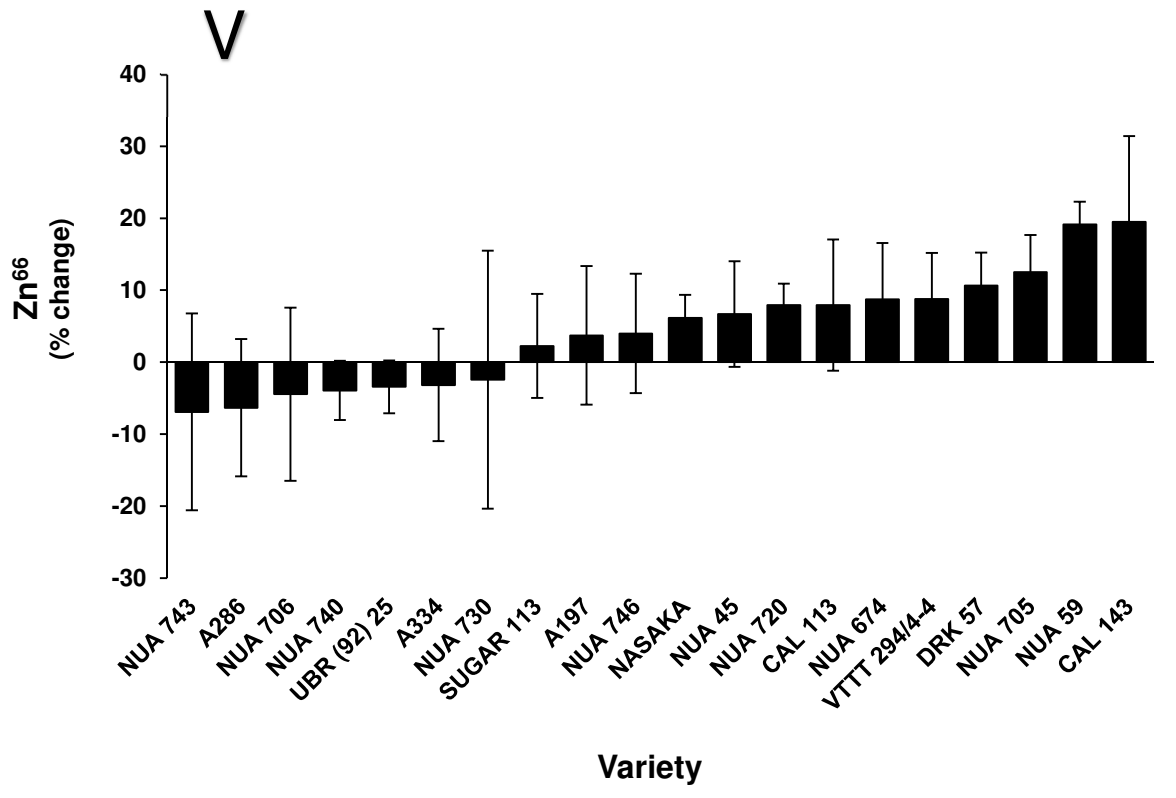



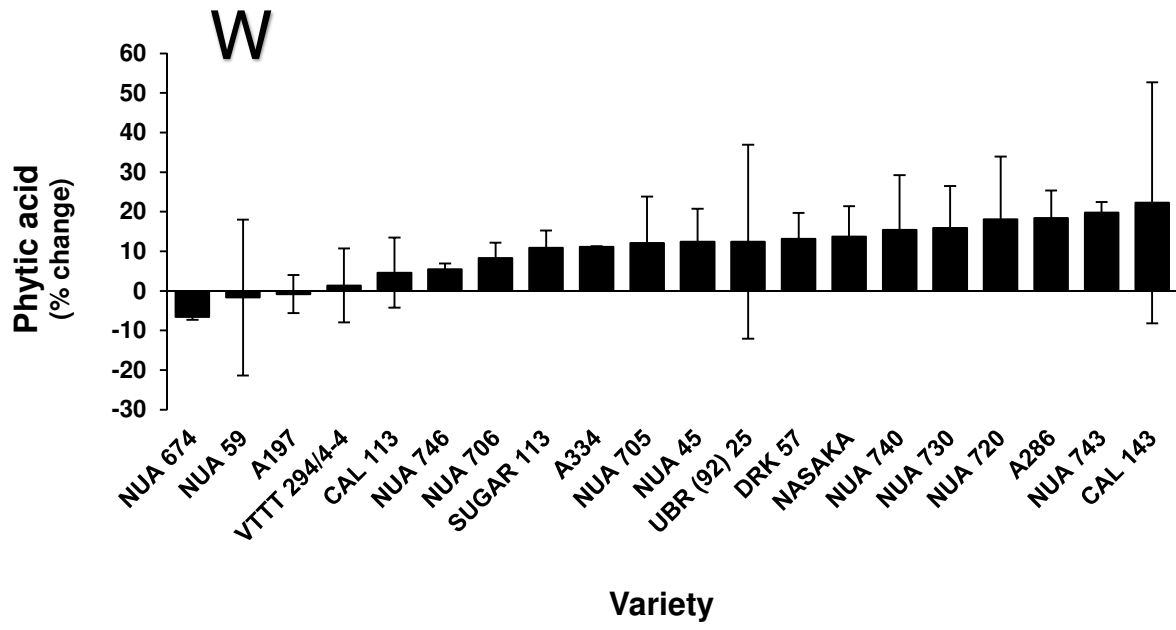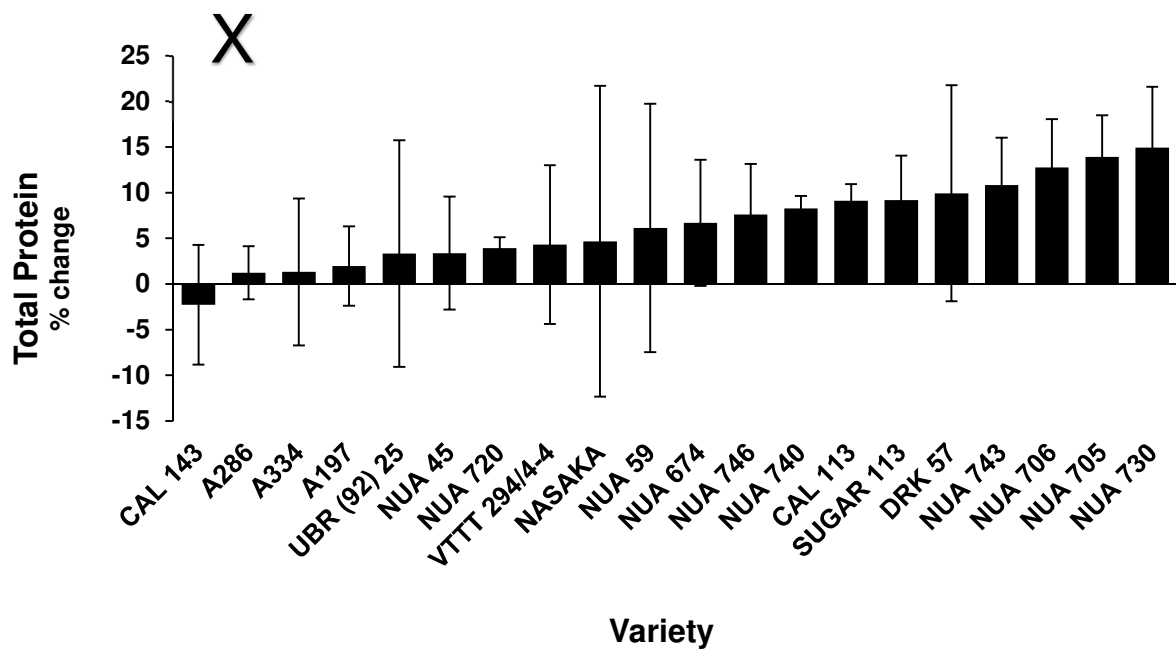

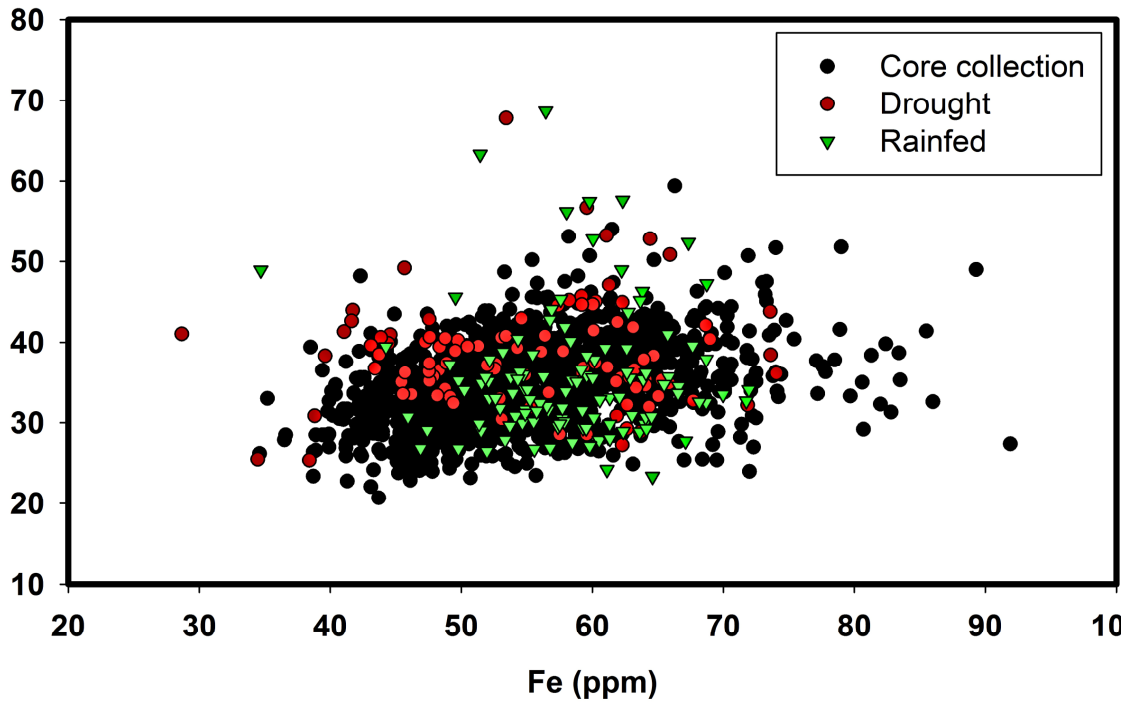

Supplement: 41598_2018_33952_MOESM1_ESM.pdf [file 41598_2018_33952_MOESM1_ESM.pdf]
