# Supplementary material for: Reduction in nutritional quality and growing area suitability of common bean under climate change induced drought stress in Africa
Source: PubMed Central journal article supplement (PMC6212502; doi:10.1038/s41598-018-33952-4), 2018-11-01

## **Supplementary Data & Information**

### **Reduction in nutritional quality and growing area suitability of common bean under climate change induced drought stress in Africa**

Marijke Hummel<sup>1</sup>, Brendan F. Hallahan<sup>1</sup>, Galina Brychkova<sup>1</sup>, Julian Ramirez-Villegas<sup>2</sup>, Veronica Guwela<sup>1</sup>, Bartholomew Chataika<sup>3</sup>, Edna Curley<sup>1</sup>, Peter C. McKeown<sup>1</sup>, Liam Morrison<sup>1</sup>, Elise Talsma<sup>2</sup>, Steve Beebe<sup>2</sup>, Andy Jarvis<sup>2</sup>, Rowland Chirwa<sup>3</sup>, and Charles Spillane<sup>1,\*</sup>

**Supplementary Information** | Detailed ICP-MS methodology

**Raw data file** | Yield and micronutrient levels.

**Supplementary Results File** | SPSS statistical output of all analyses

## **Supplementary Information**

### **Methods and Materials**

#### **ICP-MS analysis of elemental composition of common bean grains**

Bean powder (ground/milled) in Eppendorf tubes were transferred into Pyrex test tubes (16 x 100 mm). After weighing the appropriate number of samples (these masses were used to calculate the rest of the sample masses, trace metal grade nitric acid (J. T. Baker Instra-Analyzed; Avantor Performance Materials; Scientific & Chemical Supplies Ltd, Aberdeen, UK) spiked with indium internal standard was added to the tubes (1.20 mL per tube); hydrogen peroxide (1.20 mL per tube) (PrimaTrace analysis grade, 30%; Fisher Scientific, Loughborough, UK) was also added. The beans seed samples were left overnight to pre-digest. They were then digested in dry block heaters (DigiPREP MS, SCP Science; QMX Laboratories, Essex, UK) at 115°C for 4 hours. The digested samples were diluted to 11.5 mL with 18.2 MΩcm Milli-Q Direct water (Merck Millipore, Watford, UK) and aliquots transferred to 96-well deep well plates using adjustable multichannel pipette (Rainin; Anachem Ltd, Luton, UK) for analysis. Elemental analysis was performed with an inductively coupled plasma-mass spectrometry (ICP-MS) (PerkinElmer NexION 300D equipped with Elemental Scientific Inc. autosampler and Apex HF sample introduction system; PerkinElmer LAS Ltd, Seer Green, UK and Elemental Scientific Inc., Omaha, NE, USA, respectively) in the standard mode for all the elements except for iron which was measured using the standard and dynamic reaction modes (with ammonia gas). Twenty-two elements (B, Na, Mg, P, S, K, Ca, Ti, Cr, Mn, Fe, Co, Ni, Cu, Zn, As, Se, Rb, Sr, Mo, Cd and Pb) were monitored. Liquid reference material composed of pooled samples of the digested seed materials was prepared before the beginning of sample runs and was used throughout the whole seed samples runs. It was run after every ninth sample in all ICP-MS sample sets to correct for variation between and within ICP-MS analysis runs. Also included was reference material IPE sample 192 (String bean; Wageningen Evaluation Programs for Analytical Laboratories). The calibration standards (with indium internal standard and blanks) were prepared from single element standards (Inorganic Ventures; Essex Scientific Laboratory Supplies Ltd, Essex, UK) solutions. Sample concentrations were calculated using external calibration method within the instrument software. Further data processing was

performed using Microsoft Excel spreadsheet. Protocol is outlined in Danku et al. (2013)<sup>1</sup>.

## References

- 1 Danku, J. M., Lahner, B., Yakubova, E. & Salt, D. E. Large-scale plant ionomics. *Plant Mineral Nutrients: Methods and Protocols*, 255-276 (2013).

## SPSS Statistical Methods & Results

The following sections present the output from SPSS (version 21) for every statistical test performed on the data as described in the main text. 1) *k*-means clustering statistical analysis was carried out on weather data to determine if seasons could be justly grouped according to “rainfed” and “drought-stress” conditions. 2) An F-test was used to determine if the variation seen in yield, iron, zinc, lead and phytic acid across varieties could be attributed to genotype or the weather conditions during the field trials. 3) A one-way ANOVA was carried out to further validate the similarity in yield, iron, zinc, lead and phytic acid among varieties under both rainfed and drought-stress conditions. 4) A two-tailed independent samples t-test was carried out to analyse changes in yield and nutritional quality between rainfed and drought-stress conditions, when all bean varieties are taken as a single mixture. 5) A multiple linear regression statistical analysis was carried out to examine, in detail, which weather variable(s) can explain the changes in yield and nutritional quality.

### 1) *k*-means clustering statistical analysis

```
QUICK CLUSTER Rainfromfloweringdatetoharvest
MinTempfromfloweringdatetoharvest
    MaxTempfromfloweringdatetoharvest AvgTempfromfloweringdatetoharvest
/MISSING=LISTWISE
/CRITERIA=CLUSTER(2) MXITER(10) CONVERGE(0)
/METHOD=KMEANS(NOUPDATE)
/PRINT INITIAL.
```

### Quick Cluster

#### Notes

|                        |                                |                                                              |
|------------------------|--------------------------------|--------------------------------------------------------------|
| Output Created         |                                | 10-NOV-2017 17:18:51                                         |
| Comments               |                                |                                                              |
| Input                  | Data                           | C:\Users\0115647s\Desktop\brendan halaran\Brendah data 2.sav |
|                        | Active Dataset                 | DataSet2                                                     |
|                        | Filter                         | <none>                                                       |
|                        | Weight                         | <none>                                                       |
|                        | Split File                     | <none>                                                       |
|                        | N of Rows in Working Data File | 240                                                          |
| Missing Value Handling | Definition of Missing          | User-defined missing values are treated as missing.          |

|            |                    |                                                                                                                                                                                                                                                                                                  |
|------------|--------------------|--------------------------------------------------------------------------------------------------------------------------------------------------------------------------------------------------------------------------------------------------------------------------------------------------|
| Cases Used |                    | Statistics are based on cases with no missing values for any clustering variable used.                                                                                                                                                                                                           |
| Syntax     |                    | QUICK CLUSTER<br>Rainfromfloweringdatetoharvest<br>MinTempfromfloweringdatetoharvest<br><br>MaxTempfromfloweringdatetoharvest<br>AvgTempfromfloweringdatetoharvest<br><br>/MISSING=LISTWISE<br>/CRITERIA=CLUSTER(2)<br>MXITER(10) CONVERGE(0)<br><br>/METHOD=KMEANS(NOUPDATE)<br>/PRINT INITIAL. |
| Resources  | Processor Time     | 00:00:00.02                                                                                                                                                                                                                                                                                      |
|            | Elapsed Time       | 00:00:00.02                                                                                                                                                                                                                                                                                      |
|            | Workspace Required | 656 bytes                                                                                                                                                                                                                                                                                        |

### Initial Cluster Centers

|                                         | Cluster |       |
|-----------------------------------------|---------|-------|
|                                         | 1       | 2     |
| Rain from flowering date to harvest     | 106.40  | 5.90  |
| Min Temp from flowering date to harvest | 9.7     | 11.8  |
| Max Temp from flowering date to harvest | 30.1    | 34.9  |
| Avg Temp from flowering date to harvest | 21.57   | 22.89 |

### Iteration History<sup>a</sup>

| Iteration | Change in Cluster Centers |        |
|-----------|---------------------------|--------|
|           | 1                         | 2      |
| 1         | 20.683                    | 25.579 |
| 2         | .000                      | .000   |

a. Convergence achieved due to no or small change in cluster centers. The maximum absolute coordinate change for any center is .000. The current iteration is 2. The minimum distance between initial centers is 100.645.

### Final Cluster Centers

|                                         | Cluster |       |
|-----------------------------------------|---------|-------|
|                                         | 1       | 2     |
| Rain from flowering date to harvest     | 85.72   | 31.46 |
| Min Temp from flowering date to harvest | 9.7     | 11.3  |
| Max Temp from flowering date to harvest | 30.1    | 34.4  |
| Avg Temp from flowering date to harvest | 21.59   | 23.49 |

### Number of Cases in each

#### Cluster

|         |   |         |
|---------|---|---------|
| Cluster | 1 | 99.000  |
|         | 2 | 141.000 |
| Valid   |   | 240.000 |
| Missing |   | .000    |

```

TWOSTEP CLUSTER
  /CATEGORICAL VARIABLES=Rainfromfloweringdatetoharvest
MinTempfromfloweringdatetoharvest
  MaxTempfromfloweringdatetoharvest AvgTempfromfloweringdatetoharvest
Season
  /DISTANCE LIKELIHOOD
  /NUMCLUSTERS AUTO 2 BIC
  /HANDLENOISE 0
  /MEMALLOCATE 64
  /CRITERIA INITHRESHOLD(0) MXBRANCH(8) MXLEVEL(3)
  /VIEWMODEL DISPLAY=YES.

```

### TwoStep Cluster

#### Notes

|                        |                       |                                                                                      |
|------------------------|-----------------------|--------------------------------------------------------------------------------------|
| Output Created         |                       | 10-NOV-2017 17:22:39                                                                 |
| Comments               |                       |                                                                                      |
| Input                  | Data                  | C:\Users\0115647s\Desktop\brendan halaran\Brendah data 2.sav                         |
|                        | Active Dataset        | DataSet2                                                                             |
|                        | Filter                | <none>                                                                               |
|                        | Weight                | <none>                                                                               |
|                        | Split File            | <none>                                                                               |
| Missing Value Handling | Definition of Missing | User-defined missing values are treated as missing.                                  |
|                        | Cases Used            | Statistics are based on all cases with valid data for all variables in the analysis. |

|             |                |                                                                                                                                                                                                                                                                                                                                                                                                                                                        |
|-------------|----------------|--------------------------------------------------------------------------------------------------------------------------------------------------------------------------------------------------------------------------------------------------------------------------------------------------------------------------------------------------------------------------------------------------------------------------------------------------------|
| Syntax      |                | <p>TWOSTEP CLUSTER</p> <p>/CATEGORICAL</p> <p>VARIABLES=Rainfromfloweringdat<br/>etoharvest</p> <p>MinTempfromfloweringdatetoharve<br/>st</p> <p>MaxTempfromfloweringdatetoharv<br/>est</p> <p>AvgTempfromfloweringdatetoharve<br/>st Season</p> <p>/DISTANCE LIKELIHOOD</p> <p>/NUMCLUSTERS AUTO 2 BIC</p> <p>/HANDLENOISE 0</p> <p>/MEMALLOCATE 64</p> <p>/CRITERIA INITHRESHOLD(0)</p> <p>MXBRANCH(8) MXLEVEL(3)</p> <p>/VIEWMODEL DISPLAY=YES.</p> |
| Resources   | Processor Time | 00:00:00.06                                                                                                                                                                                                                                                                                                                                                                                                                                            |
|             | Elapsed Time   | 00:00:00.06                                                                                                                                                                                                                                                                                                                                                                                                                                            |
| Files Saved | Model          | C:\Users\0115647s\AppData\Local<br>\Temp\spss11888\tsctempm.24                                                                                                                                                                                                                                                                                                                                                                                         |

null : null

### Model Summary

|                  |         |
|------------------|---------|
| <b>Algorithm</b> | TwoStep |
| <b>Inputs</b>    | 5       |
| <b>Clusters</b>  | 2       |

### Cluster Quality

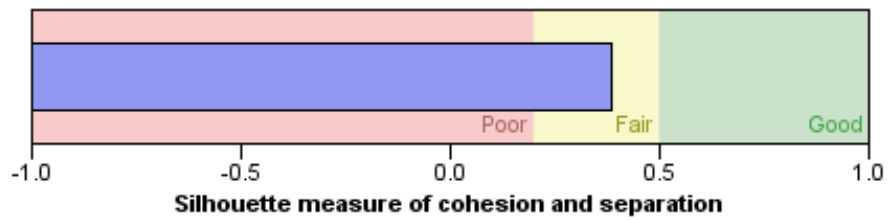



## 2) F-test statistical analysis

```

REGRESSION
  /DESCRIPTIVES MEAN STDDEV CORR SIG N
  /MISSING LISTWISE
  /STATISTICS COEFF OUTS CI(95) R ANOVA COLLIN TOL
  /CRITERIA=PIN(.05) POUT(.10)
  /NOORIGIN
  /DEPENDENT SQRT_Yield
  /METHOD=STEPWISE Variety Condition
  /SCATTERPLOT=(*ZRESID ,*ZPRED)
  /RESIDUALS HISTOGRAM(ZRESID) NORMPROB(ZRESID)
  /CASEWISE PLOT(ZRESID) OUTLIERS(3)
  /SAVE COOK ZRESID.
  
```

## Regression

### Notes

|                        |                                |                                                                                                           |
|------------------------|--------------------------------|-----------------------------------------------------------------------------------------------------------|
| Output Created         |                                | 27-NOV-2017 15:27:03                                                                                      |
| Comments               |                                |                                                                                                           |
| Input                  | Data                           | C:\Users\Brendan\Documents\Mi<br>cronutrients\Yield and<br>micronutirents<br>variety+condition+season.sav |
|                        | Active Dataset                 | DataSet1                                                                                                  |
|                        | Filter                         | <none>                                                                                                    |
|                        | Weight                         | <none>                                                                                                    |
|                        | Split File                     | <none>                                                                                                    |
|                        | N of Rows in Working Data File | 240                                                                                                       |
| Missing Value Handling | Definition of Missing          | User-defined missing values are<br>treated as missing.                                                    |
|                        | Cases Used                     | Statistics are based on cases<br>with no missing values for any<br>variable used.                         |

|                               |                                               |                                                                                                                                                                                                                                                                                                                                                                                                                |
|-------------------------------|-----------------------------------------------|----------------------------------------------------------------------------------------------------------------------------------------------------------------------------------------------------------------------------------------------------------------------------------------------------------------------------------------------------------------------------------------------------------------|
| Syntax                        |                                               | REGRESSION<br>/DESCRIPTIVES MEAN<br>STDDEV CORR SIG N<br>/MISSING LISTWISE<br>/STATISTICS COEFF OUTS<br>CI(95) R ANOVA COLLIN TOL<br>/CRITERIA=PIN(.05)<br>POUT(.10)<br>/NOORIGIN<br>/DEPENDENT SQRT_Yield<br>/METHOD=STEPWISE Variety<br>Condition<br>/SCATTERPLOT=(*ZRESID<br>,*ZPRED)<br>/RESIDUALS<br>HISTOGRAM(ZRESID)<br>NORMPROB(ZRESID)<br>/CASEWISE PLOT(ZRESID)<br>OUTLIERS(3)<br>/SAVE COOK ZRESID. |
| Resources                     | Processor Time                                | 00:00:02.92                                                                                                                                                                                                                                                                                                                                                                                                    |
|                               | Elapsed Time                                  | 00:00:03.95                                                                                                                                                                                                                                                                                                                                                                                                    |
|                               | Memory Required                               | 5632 bytes                                                                                                                                                                                                                                                                                                                                                                                                     |
|                               | Additional Memory Required for Residual Plots | 664 bytes                                                                                                                                                                                                                                                                                                                                                                                                      |
| Variables Created or Modified | ZRE_7                                         | Standardized Residual                                                                                                                                                                                                                                                                                                                                                                                          |
|                               | COO_7                                         | Cook's Distance                                                                                                                                                                                                                                                                                                                                                                                                |

### Descriptive Statistics

|            | Mean      | Std. Deviation | N   |
|------------|-----------|----------------|-----|
| SQRT_Yield | 23.809972 | 10.7317498     | 236 |
| Variety    | 10.42     | 5.768          | 236 |
| Condition  | 1.50      | .501           | 236 |

### Correlations

|                     |            | SQRT_Yield | Variety | Condition |
|---------------------|------------|------------|---------|-----------|
| Pearson Correlation | SQRT_Yield | 1.000      | -.096   | -.630     |
|                     | Variety    | -.096      | 1.000   | -.002     |
|                     | Condition  | -.630      | -.002   | 1.000     |
| Sig. (1-tailed)     | SQRT_Yield | .          | .071    | .000      |
|                     | Variety    | .071       | .       | .490      |

|   |            |      |      |     |
|---|------------|------|------|-----|
|   | Condition  | .000 | .490 | .   |
| N | SQRT_Yield | 236  | 236  | 236 |
|   | Variety    | 236  | 236  | 236 |
|   | Condition  | 236  | 236  | 236 |

### Variables Entered/Removed<sup>a</sup>

| Model | Variables Entered | Variables Removed | Method                                                                                      |
|-------|-------------------|-------------------|---------------------------------------------------------------------------------------------|
| 1     | Condition         | .                 | Stepwise (Criteria: Probability-of-F-to-enter <= .050, Probability-of-F-to-remove >= .100). |

a. Dependent Variable: SQRT\_Yield

```

REGRESSION
  /DESCRIPTIVES MEAN STDDEV CORR SIG N
  /MISSING LISTWISE
  /STATISTICS COEFF OUTS CI(95) R ANOVA COLLIN TOL
  /CRITERIA=PIN(.05) POUT(.10)
  /NOORIGIN
  /DEPENDENT Fe56_ppm
  /METHOD=STEPWISE Variety Condition
  /SCATTERPLOT=(*ZRESID ,*ZPRED)
  /RESIDUALS HISTOGRAM(ZRESID) NORMPROB(ZRESID)
  /CASEWISE PLOT(ZRESID) OUTLIERS(3)
  /SAVE COOK ZRESID.

```

## Regression

### Descriptive Statistics

|           | Mean      | Std. Deviation | N   |
|-----------|-----------|----------------|-----|
| Fe56_ppm  | 56.524989 | 7.8494808      | 230 |
| Variety   | 10.41     | 5.816          | 230 |
| Condition | 1.48      | .501           | 230 |

### Correlations

|                     |           | Fe56_ppm | Variety | Condition |
|---------------------|-----------|----------|---------|-----------|
| Pearson Correlation | Fe56_ppm  | 1.000    | -.021   | -.222     |
|                     | Variety   | -.021    | 1.000   | -.016     |
|                     | Condition | -.222    | -.016   | 1.000     |
| Sig. (1-tailed)     | Fe56_ppm  | .        | .378    | .000      |

|   |           |      |      |      |
|---|-----------|------|------|------|
|   | Variety   | .378 | .    | .407 |
|   | Condition | .000 | .407 | .    |
| N | Fe56_ppm  | 230  | 230  | 230  |
|   | Variety   | 230  | 230  | 230  |
|   | Condition | 230  | 230  | 230  |

### Variables Entered/Removed<sup>a</sup>

| Model | Variables Entered | Variables Removed | Method                                                                                      |
|-------|-------------------|-------------------|---------------------------------------------------------------------------------------------|
| 1     | Condition         | .                 | Stepwise (Criteria: Probability-of-F-to-enter <= .050, Probability-of-F-to-remove >= .100). |

a. Dependent Variable: Fe56\_ppm

### REGRESSION

```

/DESCRIPTIVES MEAN STDDEV CORR SIG N
/MISSING LISTWISE
/STATISTICS COEFF OUTS CI(95) R ANOVA COLLIN TOL
/CRITERIA=PIN(.05) POUT(.10)
/NOORIGIN
/DEPENDENT Zn66_ppm
/METHOD=STEPWISE Variety Condition
/SCATTERPLOT=(*ZRESID ,*ZPRED)
/RESIDUALS HISTOGRAM(ZRESID) NORMPROB(ZRESID)
/CASEWISE PLOT(ZRESID) OUTLIERS(3)
/SAVE COOK ZRESID.

```

## Regression

### Descriptive Statistics

|           | Mean      | Std. Deviation | N   |
|-----------|-----------|----------------|-----|
| Zn66_ppm  | 36.928831 | 8.1625681      | 227 |
| Variety   | 10.42     | 5.815          | 227 |
| Condition | 1.48      | .501           | 227 |

### Correlations

|                     |           | Zn66_ppm | Variety | Condition |
|---------------------|-----------|----------|---------|-----------|
| Pearson Correlation | Zn66_ppm  | 1.000    | -.128   | .203      |
|                     | Variety   | -.128    | 1.000   | -.006     |
|                     | Condition | .203     | -.006   | 1.000     |

|                 |           |      |      |      |
|-----------------|-----------|------|------|------|
| Sig. (1-tailed) | Zn66_ppm  | .    | .027 | .001 |
|                 | Variety   | .027 | .    | .462 |
|                 | Condition | .001 | .462 | .    |
| N               | Zn66_ppm  | 227  | 227  | 227  |
|                 | Variety   | 227  | 227  | 227  |
|                 | Condition | 227  | 227  | 227  |

### Variables Entered/Removed<sup>a</sup>

| Model | Variables Entered | Variables Removed | Method                                                                                      |
|-------|-------------------|-------------------|---------------------------------------------------------------------------------------------|
| 1     | Condition         | .                 | Stepwise (Criteria: Probability-of-F-to-enter <= .050, Probability-of-F-to-remove >= .100). |

a. Dependent Variable: Zn66\_ppm

```

REGRESSION
  /DESCRIPTIVES MEAN STDDEV CORR SIG N
  /MISSING LISTWISE
  /STATISTICS COEFF OUTS CI(95) R ANOVA COLLIN TOL
  /CRITERIA=PIN(.05) POUT(.10)
  /NOORIGIN
  /DEPENDENT LG10_Pb208
  /METHOD=STEPWISE Variety Condition
  /SCATTERPLOT=(*ZRESID ,*ZPRED)
  /RESIDUALS HISTOGRAM(ZRESID) NORMPROB(ZRESID)
  /CASEWISE PLOT(ZRESID) OUTLIERS(3)
  /SAVE COOK ZRESID.

```

## Regression

### Descriptive Statistics

|            | Mean    | Std. Deviation | N   |
|------------|---------|----------------|-----|
| LG10_Pb208 | -1.2540 | .52050         | 230 |
| Variety    | 10.41   | 5.816          | 230 |
| Condition  | 1.48    | .501           | 230 |

### Correlations

|                     |            | LG10_Pb208 | Variety | Condition |
|---------------------|------------|------------|---------|-----------|
| Pearson Correlation | LG10_Pb208 | 1.000      | .026    | .525      |
|                     | Variety    | .026       | 1.000   | -.016     |
|                     | Condition  | .525       | -.016   | 1.000     |

|                 |            |      |      |      |
|-----------------|------------|------|------|------|
| Sig. (1-tailed) | LG10_Pb208 | .    | .349 | .000 |
|                 | Variety    | .349 | .    | .407 |
|                 | Condition  | .000 | .407 | .    |
| N               | LG10_Pb208 | 230  | 230  | 230  |
|                 | Variety    | 230  | 230  | 230  |
|                 | Condition  | 230  | 230  | 230  |

### Variables Entered/Removed<sup>a</sup>

| Model | Variables Entered | Variables Removed | Method                                                                                      |
|-------|-------------------|-------------------|---------------------------------------------------------------------------------------------|
| 1     | Condition         | .                 | Stepwise (Criteria: Probability-of-F-to-enter <= .050, Probability-of-F-to-remove >= .100). |

a. Dependent Variable: LG10\_Pb208

```

REGRESSION
  /DESCRIPTIVES MEAN STDDEV CORR SIG N
  /MISSING LISTWISE
  /STATISTICS COEFF OUTS CI(95) R ANOVA COLLIN TOL
  /CRITERIA=PIN(.05) POUT(.10)
  /NOORIGIN
  /DEPENDENT Phytic_acid_percent
  /METHOD=STEPWISE Variety Condition
  /SCATTERPLOT=(*ZRESID ,*ZPRED)
  /RESIDUALS HISTOGRAM(ZRESID) NORMPROB(ZRESID)
  /CASEWISE PLOT(ZRESID) OUTLIERS(3)
  /SAVE COOK ZRESID.

```

## Regression

### Descriptive Statistics

|                     | Mean   | Std. Deviation | N   |
|---------------------|--------|----------------|-----|
| Phytic_acid_percent | 1.0544 | .31563         | 229 |
| Variety             | 10.44  | 5.818          | 229 |
| Condition           | 1.48   | .501           | 229 |

### Correlations

|                     |                     | Phytic_acid_percent | Variety | Condition |
|---------------------|---------------------|---------------------|---------|-----------|
| Pearson Correlation | Phytic_acid_percent | 1.000               | .038    | .310      |
|                     | Variety             | .038                | 1.000   | -.020     |
|                     | Condition           | .310                | -.020   | 1.000     |

|                 |                     |      |      |      |
|-----------------|---------------------|------|------|------|
| Sig. (1-tailed) | Phytic_acid_percent | .    | .285 | .000 |
|                 | Variety             | .285 | .    | .384 |
|                 | Condition           | .000 | .384 | .    |
| N               | Phytic_acid_percent | 229  | 229  | 229  |
|                 | Variety             | 229  | 229  | 229  |
|                 | Condition           | 229  | 229  | 229  |

### Variables Entered/Removed<sup>a</sup>

| Model | Variables Entered | Variables Removed | Method                                                                                      |
|-------|-------------------|-------------------|---------------------------------------------------------------------------------------------|
| 1     | Condition         | .                 | Stepwise (Criteria: Probability-of-F-to-enter <= .050, Probability-of-F-to-remove >= .100). |

a. Dependent Variable: Phytic\_acid\_percent

DATASET ACTIVATE DataSet1.

SAVE OUTFILE='C:\Users\Brendan\Documents\Micronutrients\Yield and micronutirents '+

'variety+condition+season.sav'

/COMPRESSED.

REGRESSION

/DESCRIPTIVES MEAN STDDEV CORR SIG N

/MISSING LISTWISE

/STATISTICS COEFF OUTS CI(95) R ANOVA

/CRITERIA=PIN(.05) POUT(.10)

/NOORIGIN

/DEPENDENT Total\_protein\_mg\_per\_g\_dw

/METHOD=STEPWISE Variety Condition

/SCATTERPLOT=(\*ZRESID ,\*ZPRED)

/RESIDUALS HISTOGRAM(ZRESID) NORMPROB(ZRESID).

## Regression

### Notes

Output Created

05-JUN-2018 12:05:37

Comments

|                        |                                                                                                                                                                                                                                                                                                                                                         |                                                                                                           |
|------------------------|---------------------------------------------------------------------------------------------------------------------------------------------------------------------------------------------------------------------------------------------------------------------------------------------------------------------------------------------------------|-----------------------------------------------------------------------------------------------------------|
| Input                  | Data                                                                                                                                                                                                                                                                                                                                                    | C:\Users\Brendan\Documents\Mi<br>cronutrients\Yield and<br>micronutirents<br>variety+condition+season.sav |
|                        | Active Dataset                                                                                                                                                                                                                                                                                                                                          | DataSet1                                                                                                  |
|                        | Filter                                                                                                                                                                                                                                                                                                                                                  | <none>                                                                                                    |
|                        | Weight                                                                                                                                                                                                                                                                                                                                                  | <none>                                                                                                    |
|                        | Split File                                                                                                                                                                                                                                                                                                                                              | <none>                                                                                                    |
|                        | N of Rows in Working Data File                                                                                                                                                                                                                                                                                                                          | 240                                                                                                       |
| Missing Value Handling | Definition of Missing                                                                                                                                                                                                                                                                                                                                   | User-defined missing values are<br>treated as missing.                                                    |
|                        | Cases Used                                                                                                                                                                                                                                                                                                                                              | Statistics are based on cases<br>with no missing values for any<br>variable used.                         |
| Syntax                 | REGRESSION<br>/DESCRIPTIVES MEAN<br>STDDEV CORR SIG N<br>/MISSING LISTWISE<br>/STATISTICS COEFF OUTS<br>CI(95) R ANOVA<br>/CRITERIA=PIN(.05)<br>POUT(.10)<br>/NOORIGIN<br>/DEPENDENT<br>Total_protein_mg_per_g_dw<br>/METHOD=STEPWISE Variety<br>Condition<br>/SCATTERPLOT=(*ZRESID<br>,*ZPRED)<br>/RESIDUALS<br>HISTOGRAM(ZRESID)<br>NORMPROB(ZRESID). |                                                                                                           |
| Resources              | Processor Time                                                                                                                                                                                                                                                                                                                                          | 00:00:01.55                                                                                               |
|                        | Elapsed Time                                                                                                                                                                                                                                                                                                                                            | 00:00:00.64                                                                                               |
|                        | Memory Required                                                                                                                                                                                                                                                                                                                                         | 6432 bytes                                                                                                |
|                        | Additional Memory Required for<br>Residual Plots                                                                                                                                                                                                                                                                                                        | 664 bytes                                                                                                 |

### Descriptive Statistics

|                           | Mean     | Std. Deviation | N   |
|---------------------------|----------|----------------|-----|
| Total_protein_mg_per_g_dw | 347.2791 | 76.44644       | 230 |



|           |       |       |     |
|-----------|-------|-------|-----|
| Variety   | 10.41 | 5.816 | 230 |
| Condition | 1.48  | .501  | 230 |

### Correlations

|                     |                           | Total_protein_mg_<br>per_g_dw | Variety | Condition |
|---------------------|---------------------------|-------------------------------|---------|-----------|
| Pearson Correlation | Total_protein_mg_per_g_dw | 1.000                         | .021    | .297      |
|                     | Variety                   | .021                          | 1.000   | -.016     |
|                     | Condition                 | .297                          | -.016   | 1.000     |
| Sig. (1-tailed)     | Total_protein_mg_per_g_dw | .                             | .378    | .000      |
|                     | Variety                   | .378                          | .       | .407      |
|                     | Condition                 | .000                          | .407    | .         |
| N                   | Total_protein_mg_per_g_dw | 230                           | 230     | 230       |
|                     | Variety                   | 230                           | 230     | 230       |
|                     | Condition                 | 230                           | 230     | 230       |

### Variables Entered/Removed<sup>a</sup>

| Model | Variables Entered | Variables Removed | Method                                                                                      |
|-------|-------------------|-------------------|---------------------------------------------------------------------------------------------|
| 1     | Condition         | .                 | Stepwise (Criteria: Probability-of-F-to-enter <= .050, Probability-of-F-to-remove >= .100). |

a. Dependent Variable: Total\_protein\_mg\_per\_g\_dw

## 3) One-way ANOVA

```

USE ALL.
COMPUTE filter_$=(Condition = 1).
VARIABLE LABELS filter_$ 'Condition = 1 (FILTER)'.
VALUE LABELS filter_$ 0 'Not Selected' 1 'Selected'.
FORMATS filter_$ (f1.0).
FILTER BY filter_$.
EXECUTE.
ONEWAY SQRT_Yield BY Variety
  /STATISTICS HOMOGENEITY
  /MISSING ANALYSIS
  /POSTHOC=DUKE TUKEY BONFERRONI ALPHA(0.05).

```

## Oneway

### Notes

|                        |                                                                                                                              |                                                                                                                 |
|------------------------|------------------------------------------------------------------------------------------------------------------------------|-----------------------------------------------------------------------------------------------------------------|
| Output Created         | 23-NOV-2017 18:20:18                                                                                                         |                                                                                                                 |
| Comments               |                                                                                                                              |                                                                                                                 |
| Input                  | Data                                                                                                                         | C:\Users\Brendan\Documents\Mi<br>cronutrients\Yield and<br>micronutirents<br>variety+condition+season.sav       |
|                        | Active Dataset                                                                                                               | DataSet1                                                                                                        |
|                        | Filter                                                                                                                       | Condition = 1 (FILTER)                                                                                          |
|                        | Weight                                                                                                                       | <none>                                                                                                          |
|                        | Split File                                                                                                                   | <none>                                                                                                          |
|                        | N of Rows in Working Data File                                                                                               | 120                                                                                                             |
| Missing Value Handling | Definition of Missing                                                                                                        | User-defined missing values are<br>treated as missing.                                                          |
|                        | Cases Used                                                                                                                   | Statistics for each analysis are<br>based on cases with no missing<br>data for any variable in the<br>analysis. |
| Syntax                 | ONEWAY SQRT_Yield BY<br>Variety<br>/STATISTICS HOMOGENEITY<br>/MISSING ANALYSIS<br>/POSTHOC=TUKEY<br>BONFERRONI ALPHA(0.05). |                                                                                                                 |
| Resources              | Processor Time                                                                                                               | 00:00:00.16                                                                                                     |
|                        | Elapsed Time                                                                                                                 | 00:00:00.31                                                                                                     |

### Test of Homogeneity of Variances

SQRT\_Yield

| Levene Statistic | df1 | df2 | Sig. |
|------------------|-----|-----|------|
| 1.116            | 19  | 99  | .348 |

### ANOVA

SQRT\_Yield

|                | Sum of Squares | df  | Mean Square | F     | Sig. |
|----------------|----------------|-----|-------------|-------|------|
| Between Groups | 1108.398       | 19  | 58.337      | 1.255 | .231 |
| Within Groups  | 4600.100       | 99  | 46.466      |       |      |
| Total          | 5708.499       | 118 |             |       |      |

```

USE ALL.
COMPUTE filter_$=(Condition = 2).
VARIABLE LABELS filter_$ 'Condition = 2 (FILTER)'.
VALUE LABELS filter_$ 0 'Not Selected' 1 'Selected'.
FORMATS filter_$ (f1.0).
FILTER BY filter_$.
EXECUTE.
ONEWAY SQRT_Yield BY Variety
  /STATISTICS HOMOGENEITY
  /MISSING ANALYSIS
  /POSTHOC=TUKEY BONFERRONI ALPHA(0.05).

```

## Oneway

### Test of Homogeneity of Variances

SQRT\_Yield

| Levene Statistic | df1 | df2 | Sig. |
|------------------|-----|-----|------|
| 4.222            | 19  | 97  | .000 |

### ANOVA

SQRT\_Yield

|                | Sum of Squares | df  | Mean Square | F     | Sig. |
|----------------|----------------|-----|-------------|-------|------|
| Between Groups | 2093.999       | 19  | 110.210     | 1.255 | .232 |
| Within Groups  | 8520.053       | 97  | 87.836      |       |      |
| Total          | 10614.052      | 116 |             |       |      |

```

USE ALL.
COMPUTE filter_$=(Condition = 1).
VARIABLE LABELS filter_$ 'Condition = 1 (FILTER)'.
VALUE LABELS filter_$ 0 'Not Selected' 1 'Selected'.
FORMATS filter_$ (f1.0).
FILTER BY filter_$.
EXECUTE.
ONEWAY Fe56_ppm BY Variety
  /STATISTICS HOMOGENEITY
  /MISSING ANALYSIS
  /POSTHOC=TUKEY BONFERRONI ALPHA(0.05).

```

## Oneway

### Notes

|                        |                                                                                                                         |                                                                                                                 |
|------------------------|-------------------------------------------------------------------------------------------------------------------------|-----------------------------------------------------------------------------------------------------------------|
| Comments               |                                                                                                                         |                                                                                                                 |
| Input                  | Data                                                                                                                    | C:\Users\Brendan\Documents\Mi<br>cronutrients\Yield and<br>micronutirents<br>variety+condition+season.sav       |
|                        | Active Dataset                                                                                                          | DataSet1                                                                                                        |
|                        | Filter                                                                                                                  | Condition = 1 (FILTER)                                                                                          |
|                        | Weight                                                                                                                  | <none>                                                                                                          |
|                        | Split File                                                                                                              | <none>                                                                                                          |
|                        | N of Rows in Working Data File                                                                                          | 120                                                                                                             |
| Missing Value Handling | Definition of Missing                                                                                                   | User-defined missing values are<br>treated as missing.                                                          |
|                        | Cases Used                                                                                                              | Statistics for each analysis are<br>based on cases with no missing<br>data for any variable in the<br>analysis. |
| Syntax                 | ONEWAY Fe56_ppm BY Variety<br>/STATISTICS HOMOGENEITY<br>/MISSING ANALYSIS<br>/POSTHOC=TUKEY<br>BONFERRONI ALPHA(0.05). |                                                                                                                 |
| Resources              | Processor Time                                                                                                          | 00:00:00.11                                                                                                     |
|                        | Elapsed Time                                                                                                            | 00:00:00.10                                                                                                     |

### Test of Homogeneity of Variances

Fe56\_ppm

| Levene Statistic | df1 | df2 | Sig. |
|------------------|-----|-----|------|
| 1.400            | 19  | 100 | .144 |

### ANOVA

Fe56\_ppm

|                | Sum of Squares | df  | Mean Square | F    | Sig. |
|----------------|----------------|-----|-------------|------|------|
| Between Groups | 680.420        | 19  | 35.812      | .926 | .553 |
| Within Groups  | 3865.692       | 100 | 38.657      |      |      |
| Total          | 4546.112       | 119 |             |      |      |

```
USE ALL.
COMPUTE filter_$=(Condition = 2).
VARIABLE LABELS filter_$ 'Condition = 2 (FILTER)'.

```

```

VALUE LABELS filter_$ 0 'Not Selected' 1 'Selected'.
FORMATS filter_$ (f1.0).
FILTER BY filter_$.
EXECUTE.
ONEWAY Fe56_ppm BY Variety
  /STATISTICS HOMOGENEITY
  /MISSING ANALYSIS
  /POSTHOC=TUKEY BONFERRONI ALPHA(0.05).

```

## Oneway

### Notes

|                        |                                |                                                                                                                         |
|------------------------|--------------------------------|-------------------------------------------------------------------------------------------------------------------------|
| Output Created         |                                | 23-NOV-2017 18:29:31                                                                                                    |
| Comments               |                                |                                                                                                                         |
| Input                  | Data                           | C:\Users\Brendan\Documents\Mi<br>cronutrients\Yield and<br>micronutirents<br>variety+condition+season.sav               |
|                        | Active Dataset                 | DataSet1                                                                                                                |
|                        | Filter                         | Condition = 2 (FILTER)                                                                                                  |
|                        | Weight                         | <none>                                                                                                                  |
|                        | Split File                     | <none>                                                                                                                  |
|                        | N of Rows in Working Data File | 120                                                                                                                     |
| Missing Value Handling | Definition of Missing          | User-defined missing values are<br>treated as missing.                                                                  |
|                        | Cases Used                     | Statistics for each analysis are<br>based on cases with no missing<br>data for any variable in the<br>analysis.         |
| Syntax                 |                                | ONEWAY Fe56_ppm BY Variety<br>/STATISTICS HOMOGENEITY<br>/MISSING ANALYSIS<br>/POSTHOC=TUKEY<br>BONFERRONI ALPHA(0.05). |
| Resources              | Processor Time                 | 00:00:00.09                                                                                                             |
|                        | Elapsed Time                   | 00:00:00.10                                                                                                             |

### Test of Homogeneity of Variances

Fe56\_ppm

| Levene Statistic | df1 | df2 | Sig. |
|------------------|-----|-----|------|
| 1.044            | 19  | 90  | .421 |

## ANOVA

Fe56\_ppm

|                | Sum of Squares | df  | Mean Square | F     | Sig. |
|----------------|----------------|-----|-------------|-------|------|
| Between Groups | 1627.978       | 19  | 85.683      | 1.065 | .399 |
| Within Groups  | 7237.926       | 90  | 80.421      |       |      |
| Total          | 8865.903       | 109 |             |       |      |

```
USE ALL.
COMPUTE filter_$=(Condition = 1).
VARIABLE LABELS filter_$ 'Condition = 1 (FILTER)'.
VALUE LABELS filter_$ 0 'Not Selected' 1 'Selected'.
FORMATS filter_$ (f1.0).
FILTER BY filter_$.
EXECUTE.
ONEWAY Zn66_ppm BY Variety
  /STATISTICS HOMOGENEITY
  /MISSING ANALYSIS
  /POSTHOC=TUKEY BONFERRONI ALPHA(0.05).
```

## Oneway

### Notes

|                        |                                |                                                                                                                 |
|------------------------|--------------------------------|-----------------------------------------------------------------------------------------------------------------|
| Output Created         |                                | 23-NOV-2017 18:30:56                                                                                            |
| Comments               |                                |                                                                                                                 |
| Input                  | Data                           | C:\Users\Brendan\Documents\Mi<br>cronutrients\Yield and<br>micronutirents<br>variety+condition+season.sav       |
|                        | Active Dataset                 | DataSet1                                                                                                        |
|                        | Filter                         | Condition = 1 (FILTER)                                                                                          |
|                        | Weight                         | <none>                                                                                                          |
|                        | Split File                     | <none>                                                                                                          |
|                        | N of Rows in Working Data File | 120                                                                                                             |
| Missing Value Handling | Definition of Missing          | User-defined missing values are<br>treated as missing.                                                          |
|                        | Cases Used                     | Statistics for each analysis are<br>based on cases with no missing<br>data for any variable in the<br>analysis. |

|           |                                                                                                                         |             |
|-----------|-------------------------------------------------------------------------------------------------------------------------|-------------|
| Syntax    | ONEWAY Zn66_ppm BY Variety<br>/STATISTICS HOMOGENEITY<br>/MISSING ANALYSIS<br>/POSTHOC=TUKEY<br>BONFERRONI ALPHA(0.05). |             |
| Resources | Processor Time                                                                                                          | 00:00:00.09 |
|           | Elapsed Time                                                                                                            | 00:00:00.11 |

### Test of Homogeneity of Variances

Zn66\_ppm

| Levene Statistic | df1 | df2 | Sig. |
|------------------|-----|-----|------|
| 1.496            | 19  | 99  | .103 |

### ANOVA

Zn66\_ppm

|                | Sum of Squares | df  | Mean Square | F     | Sig. |
|----------------|----------------|-----|-------------|-------|------|
| Between Groups | 1607.768       | 19  | 84.619      | 1.470 | .114 |
| Within Groups  | 5700.091       | 99  | 57.577      |       |      |
| Total          | 7307.859       | 118 |             |       |      |

```
USE ALL.
COMPUTE filter_$=(Condition = 2).
VARIABLE LABELS filter_$ 'Condition = 2 (FILTER)'.
VALUE LABELS filter_$ 0 'Not Selected' 1 'Selected'.
FORMATS filter_$ (f1.0).
FILTER BY filter_$.
EXECUTE.
ONEWAY Zn66_ppm BY Variety
  /STATISTICS HOMOGENEITY
  /MISSING ANALYSIS
  /POSTHOC=TUKEY BONFERRONI ALPHA(0.05).
```

## Oneway

### Test of Homogeneity of Variances

Zn66\_ppm

| Levene Statistic | df1 | df2 | Sig. |
|------------------|-----|-----|------|
| 4.179            | 19  | 88  | .000 |

### ANOVA

Zn66\_ppm

|  | Sum of Squares | df | Mean Square | F | Sig. |
|--|----------------|----|-------------|---|------|
|--|----------------|----|-------------|---|------|

|                |          |     |         |       |      |
|----------------|----------|-----|---------|-------|------|
| Between Groups | 2473.228 | 19  | 130.170 | 2.459 | .002 |
| Within Groups  | 4658.904 | 88  | 52.942  |       |      |
| Total          | 7132.132 | 107 |         |       |      |

## Post Hoc Tests

### Multiple Comparisons

Dependent Variable: Zn66\_ppm

|           |      | Mean Difference |              |              | 95% Confidence Interval |            |             |             |
|-----------|------|-----------------|--------------|--------------|-------------------------|------------|-------------|-------------|
|           |      | (I) Variety     | (J) Variety  | (I-J)        | Std. Error              | Sig.       | Lower Bound | Upper Bound |
| Tukey HSD | A197 | A286            |              | 2.1717947    | 4.4059165               | 1.000      | -13.928047  | 18.271637   |
|           |      | A334            |              | .0795760     | 4.2008765               | 1.000      | -15.271021  | 15.430173   |
|           |      | CAL113          |              | -5.6127554   | 4.2008765               | .998       | -20.963353  | 9.737842    |
|           |      | CAL 143         |              | -5.4637929   | 4.2008765               | .999       | -20.814390  | 9.886804    |
|           |      | DRK 57          |              | .4596262     | 4.2008765               | 1.000      | -14.890971  | 15.810223   |
|           |      | NASAKA          |              | 1.9688614    | 4.4059165               | 1.000      | -14.130981  | 18.068704   |
|           |      | NUA 45          |              | .3409424     | 4.2008765               | 1.000      | -15.009655  | 15.691540   |
|           |      | NUA 59          |              | -18.8178737* | 4.6967228               | .017       | -35.980363  | -1.655384   |
|           |      | NUA 674         |              | 2.8080257    | 5.1450020               | 1.000      | -15.992539  | 21.608591   |
|           |      | NUA 705         |              | -1.8747725   | 4.2008765               | 1.000      | -17.225370  | 13.475825   |
|           |      | NUA 706         |              | 2.9747204    | 4.4059165               | 1.000      | -13.125122  | 19.074563   |
|           |      | NUA 720         |              | .0319731     | 4.2008765               | 1.000      | -15.318624  | 15.382570   |
|           |      | NUA 730         |              | 3.6645309    | 4.4059165               | 1.000      | -12.435311  | 19.764373   |
|           |      | NUA 740         |              | 6.3014432    | 4.2008765               | .993       | -9.049154   | 21.652040   |
|           |      | NUA 743         |              | 3.7737121    | 4.2008765               | 1.000      | -11.576885  | 19.124309   |
|           |      | NUA 746         |              | .9219538     | 4.2008765               | 1.000      | -14.428643  | 16.272551   |
|           |      | SUGAR 113       |              | -.6618439    | 4.6967228               | 1.000      | -17.824333  | 16.500646   |
|           |      | UBT (92) 25     |              | 5.1238469    | 4.2008765               | 1.000      | -10.226750  | 20.474444   |
|           |      | VTTT 294/4-4    |              | .3075969     | 4.4059165               | 1.000      | -15.792245  | 16.407439   |
|           |      | A286            | A197         |              | -2.1717947              | 4.4059165  | 1.000       | -18.271637  |
| A334      |      |                 | -2.0922187   | 4.4059165    | 1.000                   | -18.192061 | 14.007623   |             |
| CAL113    |      |                 | -7.7845502   | 4.4059165    | .963                    | -23.884392 | 8.315292    |             |
| CAL 143   |      |                 | -7.6355877   | 4.4059165    | .970                    | -23.735430 | 8.464255    |             |
| DRK 57    |      |                 | -1.7121685   | 4.4059165    | 1.000                   | -17.812011 | 14.387674   |             |
| NASAKA    |      |                 | -.2029333    | 4.6018297    | 1.000                   | -17.018670 | 16.612803   |             |
| NUA 45    |      |                 | -1.8308523   | 4.4059165    | 1.000                   | -17.930694 | 14.268990   |             |
| NUA 59    |      |                 | -20.9896685* | 4.8809775    | .006                    | -38.825451 | -3.153886   |             |
| NUA 674   |      |                 | .6362310     | 5.3137352    | 1.000                   | -18.780909 | 20.053371   |             |
| NUA 705   |      |                 | -4.0465672   | 4.4059165    | 1.000                   | -20.146409 | 12.053275   |             |
| NUA 706   |      |                 | .8029256     | 4.6018297    | 1.000                   | -16.012811 | 17.618662   |             |



|        |              |              |           |       |            |           |
|--------|--------------|--------------|-----------|-------|------------|-----------|
|        | NUA 720      | -2.1398216   | 4.4059165 | 1.000 | -18.239664 | 13.960021 |
|        | NUA 730      | 1.4927362    | 4.6018297 | 1.000 | -15.323001 | 18.308473 |
|        | NUA 740      | 4.1296484    | 4.4059165 | 1.000 | -11.970194 | 20.229491 |
|        | NUA 743      | 1.6019173    | 4.4059165 | 1.000 | -14.497925 | 17.701760 |
|        | NUA 746      | -1.2498410   | 4.4059165 | 1.000 | -17.349683 | 14.850001 |
|        | SUGAR 113    | -2.8336386   | 4.8809775 | 1.000 | -20.669421 | 15.002144 |
|        | UBT (92) 25  | 2.9520522    | 4.4059165 | 1.000 | -13.147790 | 19.051894 |
|        | VTTT 294/4-4 | -1.8641978   | 4.6018297 | 1.000 | -18.679935 | 14.951539 |
| A334   | A197         | -.0795760    | 4.2008765 | 1.000 | -15.430173 | 15.271021 |
|        | A286         | 2.0922187    | 4.4059165 | 1.000 | -14.007623 | 18.192061 |
|        | CAL113       | -5.6923315   | 4.2008765 | .998  | -21.042929 | 9.658266  |
|        | CAL 143      | -5.5433690   | 4.2008765 | .999  | -20.893966 | 9.807228  |
|        | DRK 57       | .3800502     | 4.2008765 | 1.000 | -14.970547 | 15.730647 |
|        | NASAKA       | 1.8892854    | 4.4059165 | 1.000 | -14.210557 | 17.989128 |
|        | NUA 45       | .2613664     | 4.2008765 | 1.000 | -15.089231 | 15.611964 |
|        | NUA 59       | -18.8974498* | 4.6967228 | .016  | -36.059939 | -1.734960 |
|        | NUA 674      | 2.7284497    | 5.1450020 | 1.000 | -16.072116 | 21.529015 |
|        | NUA 705      | -1.9543485   | 4.2008765 | 1.000 | -17.304946 | 13.396249 |
|        | NUA 706      | 2.8951443    | 4.4059165 | 1.000 | -13.204698 | 18.994987 |
|        | NUA 720      | -.0476029    | 4.2008765 | 1.000 | -15.398200 | 15.302994 |
|        | NUA 730      | 3.5849549    | 4.4059165 | 1.000 | -12.514887 | 19.684797 |
|        | NUA 740      | 6.2218672    | 4.2008765 | .994  | -9.128730  | 21.572464 |
|        | NUA 743      | 3.6941360    | 4.2008765 | 1.000 | -11.656461 | 19.044733 |
|        | NUA 746      | .8423777     | 4.2008765 | 1.000 | -14.508219 | 16.192975 |
|        | SUGAR 113    | -.7414199    | 4.6967228 | 1.000 | -17.903909 | 16.421070 |
|        | UBT (92) 25  | 5.0442709    | 4.2008765 | 1.000 | -10.306326 | 20.394868 |
|        | VTTT 294/4-4 | .2280209     | 4.4059165 | 1.000 | -15.871821 | 16.327863 |
| CAL113 | A197         | 5.6127554    | 4.2008765 | .998  | -9.737842  | 20.963353 |
|        | A286         | 7.7845502    | 4.4059165 | .963  | -8.315292  | 23.884392 |
|        | A334         | 5.6923315    | 4.2008765 | .998  | -9.658266  | 21.042929 |
|        | CAL 143      | .1489625     | 4.2008765 | 1.000 | -15.201635 | 15.499560 |
|        | DRK 57       | 6.0723816    | 4.2008765 | .996  | -9.278216  | 21.422979 |
|        | NASAKA       | 7.5816168    | 4.4059165 | .972  | -8.518225  | 23.681459 |
|        | NUA 45       | 5.9536978    | 4.2008765 | .997  | -9.396899  | 21.304295 |
|        | NUA 59       | -13.2051183  | 4.6967228 | .366  | -30.367608 | 3.957371  |
|        | NUA 674      | 8.4207812    | 5.1450020 | .983  | -10.379784 | 27.221346 |
|        | NUA 705      | 3.7379830    | 4.2008765 | 1.000 | -11.612614 | 19.088580 |
|        | NUA 706      | 8.5874758    | 4.4059165 | .913  | -7.512366  | 24.687318 |
|        | NUA 720      | 5.6447286    | 4.2008765 | .998  | -9.705869  | 20.995326 |
|        | NUA 730      | 9.2772863    | 4.4059165 | .845  | -6.822556  | 25.377128 |

|         |              |              |           |       |            |           |
|---------|--------------|--------------|-----------|-------|------------|-----------|
|         | NUA 740      | 11.9141986   | 4.2008765 | .351  | -3.436399  | 27.264796 |
|         | NUA 743      | 9.3864675    | 4.2008765 | .771  | -5.964130  | 24.737065 |
|         | NUA 746      | 6.5347092    | 4.2008765 | .990  | -8.815888  | 21.885306 |
|         | SUGAR 113    | 4.9509116    | 4.6967228 | 1.000 | -12.211578 | 22.113401 |
|         | UBT (92) 25  | 10.7366023   | 4.2008765 | .546  | -4.613995  | 26.087200 |
|         | VTTT 294/4-4 | 5.9203523    | 4.4059165 | .998  | -10.179490 | 22.020195 |
| CAL 143 | A197         | 5.4637929    | 4.2008765 | .999  | -9.886804  | 20.814390 |
|         | A286         | 7.6355877    | 4.4059165 | .970  | -8.464255  | 23.735430 |
|         | A334         | 5.5433690    | 4.2008765 | .999  | -9.807228  | 20.893966 |
|         | CAL113       | -.1489625    | 4.2008765 | 1.000 | -15.499560 | 15.201635 |
|         | DRK 57       | 5.9234191    | 4.2008765 | .997  | -9.427178  | 21.274016 |
|         | NASAKA       | 7.4326544    | 4.4059165 | .977  | -8.667188  | 23.532497 |
|         | NUA 45       | 5.8047354    | 4.2008765 | .998  | -9.545862  | 21.155333 |
|         | NUA 59       | -13.3540808  | 4.6967228 | .346  | -30.516570 | 3.808409  |
|         | NUA 674      | 8.2718187    | 5.1450020 | .986  | -10.528747 | 27.072384 |
|         | NUA 705      | 3.5890205    | 4.2008765 | 1.000 | -11.761577 | 18.939618 |
|         | NUA 706      | 8.4385133    | 4.4059165 | .925  | -7.661329  | 24.538355 |
|         | NUA 720      | 5.4957661    | 4.2008765 | .999  | -9.854831  | 20.846363 |
|         | NUA 730      | 9.1283238    | 4.4059165 | .862  | -6.971518  | 25.228166 |
|         | NUA 740      | 11.7652361   | 4.2008765 | .373  | -3.585361  | 27.115833 |
|         | NUA 743      | 9.2375050    | 4.2008765 | .793  | -6.113092  | 24.588102 |
|         | NUA 746      | 6.3857467    | 4.2008765 | .992  | -8.964851  | 21.736344 |
|         | SUGAR 113    | 4.8019491    | 4.6967228 | 1.000 | -12.360540 | 21.964439 |
|         | UBT (92) 25  | 10.5876399   | 4.2008765 | .572  | -4.762957  | 25.938237 |
|         | VTTT 294/4-4 | 5.7713898    | 4.4059165 | .999  | -10.328452 | 21.871232 |
| DRK 57  | A197         | -.4596262    | 4.2008765 | 1.000 | -15.810223 | 14.890971 |
|         | A286         | 1.7121685    | 4.4059165 | 1.000 | -14.387674 | 17.812011 |
|         | A334         | -.3800502    | 4.2008765 | 1.000 | -15.730647 | 14.970547 |
|         | CAL113       | -6.0723816   | 4.2008765 | .996  | -21.422979 | 9.278216  |
|         | CAL 143      | -5.9234191   | 4.2008765 | .997  | -21.274016 | 9.427178  |
|         | NASAKA       | 1.5092352    | 4.4059165 | 1.000 | -14.590607 | 17.609077 |
|         | NUA 45       | -.1186838    | 4.2008765 | 1.000 | -15.469281 | 15.231913 |
|         | NUA 59       | -19.2774999* | 4.6967228 | .012  | -36.439989 | -2.115010 |
|         | NUA 674      | 2.3483995    | 5.1450020 | 1.000 | -16.452166 | 21.148965 |
|         | NUA 705      | -2.3343986   | 4.2008765 | 1.000 | -17.684996 | 13.016199 |
|         | NUA 706      | 2.5150942    | 4.4059165 | 1.000 | -13.584748 | 18.614936 |
|         | NUA 720      | -.4276531    | 4.2008765 | 1.000 | -15.778250 | 14.922944 |
|         | NUA 730      | 3.2049047    | 4.4059165 | 1.000 | -12.894937 | 19.304747 |
|         | NUA 740      | 5.8418170    | 4.2008765 | .997  | -9.508780  | 21.192414 |
|         | NUA 743      | 3.3140859    | 4.2008765 | 1.000 | -12.036511 | 18.664683 |

|        |              |              |           |       |            |           |
|--------|--------------|--------------|-----------|-------|------------|-----------|
|        | NUA 746      | .4623276     | 4.2008765 | 1.000 | -14.888270 | 15.812925 |
|        | SUGAR 113    | -1.1214700   | 4.6967228 | 1.000 | -18.283959 | 16.041019 |
|        | UBT (92) 25  | 4.6642207    | 4.2008765 | 1.000 | -10.686376 | 20.014818 |
|        | VTTT 294/4-4 | -.1520293    | 4.4059165 | 1.000 | -16.251871 | 15.947813 |
| NASAKA | A197         | -1.9688614   | 4.4059165 | 1.000 | -18.068704 | 14.130981 |
|        | A286         | .2029333     | 4.6018297 | 1.000 | -16.612803 | 17.018670 |
|        | A334         | -1.8892854   | 4.4059165 | 1.000 | -17.989128 | 14.210557 |
|        | CAL113       | -7.5816168   | 4.4059165 | .972  | -23.681459 | 8.518225  |
|        | CAL 143      | -7.4326544   | 4.4059165 | .977  | -23.532497 | 8.667188  |
|        | DRK 57       | -1.5092352   | 4.4059165 | 1.000 | -17.609077 | 14.590607 |
|        | NUA 45       | -1.6279190   | 4.4059165 | 1.000 | -17.727761 | 14.471923 |
|        | NUA 59       | -20.7867351* | 4.8809775 | .007  | -38.622517 | -2.950953 |
|        | NUA 674      | .8391643     | 5.3137352 | 1.000 | -18.577976 | 20.256305 |
|        | NUA 705      | -3.8436339   | 4.4059165 | 1.000 | -19.943476 | 12.256208 |
|        | NUA 706      | 1.0058590    | 4.6018297 | 1.000 | -15.809878 | 17.821596 |
|        | NUA 720      | -1.9368883   | 4.4059165 | 1.000 | -18.036730 | 14.162954 |
|        | NUA 730      | 1.6956695    | 4.6018297 | 1.000 | -15.120067 | 18.511406 |
|        | NUA 740      | 4.3325818    | 4.4059165 | 1.000 | -11.767260 | 20.432424 |
|        | NUA 743      | 1.8048506    | 4.4059165 | 1.000 | -14.294992 | 17.904693 |
|        | NUA 746      | -1.0469077   | 4.4059165 | 1.000 | -17.146750 | 15.052935 |
|        | SUGAR 113    | -2.6307053   | 4.8809775 | 1.000 | -20.466487 | 15.205077 |
|        | UBT (92) 25  | 3.1549855    | 4.4059165 | 1.000 | -12.944857 | 19.254828 |
|        | VTTT 294/4-4 | -1.6612645   | 4.6018297 | 1.000 | -18.477001 | 15.154472 |
| NUA 45 | A197         | -.3409424    | 4.2008765 | 1.000 | -15.691540 | 15.009655 |
|        | A286         | 1.8308523    | 4.4059165 | 1.000 | -14.268990 | 17.930694 |
|        | A334         | -.2613664    | 4.2008765 | 1.000 | -15.611964 | 15.089231 |
|        | CAL113       | -5.9536978   | 4.2008765 | .997  | -21.304295 | 9.396899  |
|        | CAL 143      | -5.8047354   | 4.2008765 | .998  | -21.155333 | 9.545862  |
|        | DRK 57       | .1186838     | 4.2008765 | 1.000 | -15.231913 | 15.469281 |
|        | NASAKA       | 1.6279190    | 4.4059165 | 1.000 | -14.471923 | 17.727761 |
|        | NUA 59       | -19.1588162* | 4.6967228 | .013  | -36.321306 | -1.996327 |
|        | NUA 674      | 2.4670833    | 5.1450020 | 1.000 | -16.333482 | 21.267649 |
|        | NUA 705      | -2.2157149   | 4.2008765 | 1.000 | -17.566312 | 13.134882 |
|        | NUA 706      | 2.6337779    | 4.4059165 | 1.000 | -13.466064 | 18.733620 |
|        | NUA 720      | -.3089693    | 4.2008765 | 1.000 | -15.659567 | 15.041628 |
|        | NUA 730      | 3.3235885    | 4.4059165 | 1.000 | -12.776254 | 19.423431 |
|        | NUA 740      | 5.9605008    | 4.2008765 | .997  | -9.390096  | 21.311098 |
|        | NUA 743      | 3.4327696    | 4.2008765 | 1.000 | -11.917828 | 18.783367 |
|        | NUA 746      | .5810113     | 4.2008765 | 1.000 | -14.769586 | 15.931609 |
|        | SUGAR 113    | -1.0027863   | 4.6967228 | 1.000 | -18.165276 | 16.159703 |

|         |              |              |           |       |            |           |
|---------|--------------|--------------|-----------|-------|------------|-----------|
|         | UBT (92) 25  | 4.7829045    | 4.2008765 | 1.000 | -10.567693 | 20.133502 |
|         | VTTT 294/4-4 | -.0333455    | 4.4059165 | 1.000 | -16.133188 | 16.066497 |
| NUA 59  | A197         | 18.8178737*  | 4.6967228 | .017  | 1.655384   | 35.980363 |
|         | A286         | 20.9896685*  | 4.8809775 | .006  | 3.153886   | 38.825451 |
|         | A334         | 18.8974498*  | 4.6967228 | .016  | 1.734960   | 36.059939 |
|         | CAL113       | 13.2051183   | 4.6967228 | .366  | -3.957371  | 30.367608 |
|         | CAL 143      | 13.3540808   | 4.6967228 | .346  | -3.808409  | 30.516570 |
|         | DRK 57       | 19.2774999*  | 4.6967228 | .012  | 2.115010   | 36.439989 |
|         | NASAKA       | 20.7867351*  | 4.8809775 | .007  | 2.950953   | 38.622517 |
|         | NUA 45       | 19.1588162*  | 4.6967228 | .013  | 1.996327   | 36.321306 |
|         | NUA 674      | 21.6258995*  | 5.5572373 | .025  | 1.318968   | 41.932831 |
|         | NUA 705      | 16.9431013   | 4.6967228 | .057  | -.219388   | 34.105591 |
|         | NUA 706      | 21.7925941*  | 4.8809775 | .004  | 3.956812   | 39.628376 |
|         | NUA 720      | 18.8498469*  | 4.6967228 | .017  | 1.687357   | 36.012336 |
|         | NUA 730      | 22.4824046*  | 4.8809775 | .002  | 4.646622   | 40.318187 |
|         | NUA 740      | 25.1193169*  | 4.6967228 | .000  | 7.956827   | 42.281806 |
|         | NUA 743      | 22.5915858*  | 4.6967228 | .001  | 5.429096   | 39.754075 |
|         | NUA 746      | 19.7398275*  | 4.6967228 | .009  | 2.577338   | 36.902317 |
|         | SUGAR 113    | 18.1560299   | 5.1450020 | .071  | -.644535   | 36.956595 |
|         | UBT (92) 25  | 23.9417206*  | 4.6967228 | .000  | 6.779231   | 41.104210 |
|         | VTTT 294/4-4 | 19.1254706*  | 4.8809775 | .023  | 1.289688   | 36.961253 |
| NUA 674 | A197         | -2.8080257   | 5.1450020 | 1.000 | -21.608591 | 15.992539 |
|         | A286         | -.6362310    | 5.3137352 | 1.000 | -20.053371 | 18.780909 |
|         | A334         | -2.7284497   | 5.1450020 | 1.000 | -21.529015 | 16.072116 |
|         | CAL113       | -8.4207812   | 5.1450020 | .983  | -27.221346 | 10.379784 |
|         | CAL 143      | -8.2718187   | 5.1450020 | .986  | -27.072384 | 10.528747 |
|         | DRK 57       | -2.3483995   | 5.1450020 | 1.000 | -21.148965 | 16.452166 |
|         | NASAKA       | -.8391643    | 5.3137352 | 1.000 | -20.256305 | 18.577976 |
|         | NUA 45       | -2.4670833   | 5.1450020 | 1.000 | -21.267649 | 16.333482 |
|         | NUA 59       | -21.6258995* | 5.5572373 | .025  | -41.932831 | -1.318968 |
|         | NUA 705      | -4.6827982   | 5.1450020 | 1.000 | -23.483363 | 14.117767 |
|         | NUA 706      | .1666946     | 5.3137352 | 1.000 | -19.250446 | 19.583835 |
|         | NUA 720      | -2.7760526   | 5.1450020 | 1.000 | -21.576618 | 16.024513 |
|         | NUA 730      | .8565052     | 5.3137352 | 1.000 | -18.560635 | 20.273645 |
|         | NUA 740      | 3.4934175    | 5.1450020 | 1.000 | -15.307148 | 22.293983 |
|         | NUA 743      | .9656863     | 5.1450020 | 1.000 | -17.834879 | 19.766252 |
|         | NUA 746      | -1.8860720   | 5.1450020 | 1.000 | -20.686637 | 16.914493 |
|         | SUGAR 113    | -3.4698696   | 5.5572373 | 1.000 | -23.776801 | 16.837062 |
|         | UBT (92) 25  | 2.3158212    | 5.1450020 | 1.000 | -16.484744 | 21.116386 |
|         | VTTT 294/4-4 | -2.5004288   | 5.3137352 | 1.000 | -21.917569 | 16.916711 |

|              |              |              |            |           |            |            |
|--------------|--------------|--------------|------------|-----------|------------|------------|
| NUA 705      | A197         | 1.8747725    | 4.2008765  | 1.000     | -13.475825 | 17.225370  |
|              | A286         | 4.0465672    | 4.4059165  | 1.000     | -12.053275 | 20.146409  |
|              | A334         | 1.9543485    | 4.2008765  | 1.000     | -13.396249 | 17.304946  |
|              | CAL113       | -3.7379830   | 4.2008765  | 1.000     | -19.088580 | 11.612614  |
|              | CAL 143      | -3.5890205   | 4.2008765  | 1.000     | -18.939618 | 11.761577  |
|              | DRK 57       | 2.3343986    | 4.2008765  | 1.000     | -13.016199 | 17.684996  |
|              | NASAKA       | 3.8436339    | 4.4059165  | 1.000     | -12.256208 | 19.943476  |
|              | NUA 45       | 2.2157149    | 4.2008765  | 1.000     | -13.134882 | 17.566312  |
|              | NUA 59       | -16.9431013  | 4.6967228  | .057      | -34.105591 | .219388    |
|              | NUA 674      | 4.6827982    | 5.1450020  | 1.000     | -14.117767 | 23.483363  |
|              | NUA 706      | 4.8494928    | 4.4059165  | 1.000     | -11.250349 | 20.949335  |
|              | NUA 720      | 1.9067456    | 4.2008765  | 1.000     | -13.443852 | 17.257343  |
|              | NUA 730      | 5.5393033    | 4.4059165  | .999      | -10.560539 | 21.639146  |
|              | NUA 740      | 8.1762156    | 4.2008765  | .914      | -7.174382  | 23.526813  |
|              | NUA 743      | 5.6484845    | 4.2008765  | .998      | -9.702113  | 20.999082  |
|              | NUA 746      | 2.7967262    | 4.2008765  | 1.000     | -12.553871 | 18.147323  |
|              | SUGAR 113    | 1.2129286    | 4.6967228  | 1.000     | -15.949561 | 18.375418  |
|              | UBT (92) 25  | 6.9986194    | 4.2008765  | .979      | -8.351978  | 22.349217  |
|              | VTTT 294/4-4 | 2.1823694    | 4.4059165  | 1.000     | -13.917473 | 18.282212  |
|              | NUA 706      | A197         | -2.9747204 | 4.4059165 | 1.000      | -19.074563 |
| A286         |              | -.8029256    | 4.6018297  | 1.000     | -17.618662 | 16.012811  |
| A334         |              | -2.8951443   | 4.4059165  | 1.000     | -18.994987 | 13.204698  |
| CAL113       |              | -8.5874758   | 4.4059165  | .913      | -24.687318 | 7.512366   |
| CAL 143      |              | -8.4385133   | 4.4059165  | .925      | -24.538355 | 7.661329   |
| DRK 57       |              | -2.5150942   | 4.4059165  | 1.000     | -18.614936 | 13.584748  |
| NASAKA       |              | -1.0058590   | 4.6018297  | 1.000     | -17.821596 | 15.809878  |
| NUA 45       |              | -2.6337779   | 4.4059165  | 1.000     | -18.733620 | 13.466064  |
| NUA 59       |              | -21.7925941* | 4.8809775  | .004      | -39.628376 | -3.956812  |
| NUA 674      |              | -.1666946    | 5.3137352  | 1.000     | -19.583835 | 19.250446  |
| NUA 705      |              | -4.8494928   | 4.4059165  | 1.000     | -20.949335 | 11.250349  |
| NUA 720      |              | -2.9427472   | 4.4059165  | 1.000     | -19.042589 | 13.157095  |
| NUA 730      |              | .6898105     | 4.6018297  | 1.000     | -16.125926 | 17.505547  |
| NUA 740      |              | 3.3267228    | 4.4059165  | 1.000     | -12.773119 | 19.426565  |
| NUA 743      |              | .7989917     | 4.4059165  | 1.000     | -15.300850 | 16.898834  |
| NUA 746      |              | -2.0527666   | 4.4059165  | 1.000     | -18.152609 | 14.047076  |
| SUGAR 113    |              | -3.6365642   | 4.8809775  | 1.000     | -21.472346 | 14.199218  |
| UBT (92) 25  |              | 2.1491265    | 4.4059165  | 1.000     | -13.950716 | 18.248969  |
| VTTT 294/4-4 |              | -2.6671235   | 4.6018297  | 1.000     | -19.482860 | 14.148613  |
| NUA 720      |              | A197         | -.0319731  | 4.2008765 | 1.000      | -15.382570 |
|              | A286         | 2.1398216    | 4.4059165  | 1.000     | -13.960021 | 18.239664  |

|         |              |              |           |       |            |           |
|---------|--------------|--------------|-----------|-------|------------|-----------|
|         | A334         | .0476029     | 4.2008765 | 1.000 | -15.302994 | 15.398200 |
|         | CAL113       | -5.6447286   | 4.2008765 | .998  | -20.995326 | 9.705869  |
|         | CAL 143      | -5.4957661   | 4.2008765 | .999  | -20.846363 | 9.854831  |
|         | DRK 57       | .4276531     | 4.2008765 | 1.000 | -14.922944 | 15.778250 |
|         | NASAKA       | 1.9368883    | 4.4059165 | 1.000 | -14.162954 | 18.036730 |
|         | NUA 45       | .3089693     | 4.2008765 | 1.000 | -15.041628 | 15.659567 |
|         | NUA 59       | -18.8498469* | 4.6967228 | .017  | -36.012336 | -1.687357 |
|         | NUA 674      | 2.7760526    | 5.1450020 | 1.000 | -16.024513 | 21.576618 |
|         | NUA 705      | -1.9067456   | 4.2008765 | 1.000 | -17.257343 | 13.443852 |
|         | NUA 706      | 2.9427472    | 4.4059165 | 1.000 | -13.157095 | 19.042589 |
|         | NUA 730      | 3.6325578    | 4.4059165 | 1.000 | -12.467284 | 19.732400 |
|         | NUA 740      | 6.2694701    | 4.2008765 | .994  | -9.081127  | 21.620067 |
|         | NUA 743      | 3.7417389    | 4.2008765 | 1.000 | -11.608858 | 19.092336 |
|         | NUA 746      | .8899806     | 4.2008765 | 1.000 | -14.460617 | 16.240578 |
|         | SUGAR 113    | -.6938170    | 4.6967228 | 1.000 | -17.856306 | 16.468672 |
|         | UBT (92) 25  | 5.0918738    | 4.2008765 | 1.000 | -10.258723 | 20.442471 |
|         | VTTT 294/4-4 | .2756238     | 4.4059165 | 1.000 | -15.824218 | 16.375466 |
| NUA 730 | A197         | -3.6645309   | 4.4059165 | 1.000 | -19.764373 | 12.435311 |
|         | A286         | -1.4927362   | 4.6018297 | 1.000 | -18.308473 | 15.323001 |
|         | A334         | -3.5849549   | 4.4059165 | 1.000 | -19.684797 | 12.514887 |
|         | CAL113       | -9.2772863   | 4.4059165 | .845  | -25.377128 | 6.822556  |
|         | CAL 143      | -9.1283238   | 4.4059165 | .862  | -25.228166 | 6.971518  |
|         | DRK 57       | -3.2049047   | 4.4059165 | 1.000 | -19.304747 | 12.894937 |
|         | NASAKA       | -1.6956695   | 4.6018297 | 1.000 | -18.511406 | 15.120067 |
|         | NUA 45       | -3.3235885   | 4.4059165 | 1.000 | -19.423431 | 12.776254 |
|         | NUA 59       | -22.4824046* | 4.8809775 | .002  | -40.318187 | -4.646622 |
|         | NUA 674      | -.8565052    | 5.3137352 | 1.000 | -20.273645 | 18.560635 |
|         | NUA 705      | -5.5393033   | 4.4059165 | .999  | -21.639146 | 10.560539 |
|         | NUA 706      | -.6898105    | 4.6018297 | 1.000 | -17.505547 | 16.125926 |
|         | NUA 720      | -3.6325578   | 4.4059165 | 1.000 | -19.732400 | 12.467284 |
|         | NUA 740      | 2.6369123    | 4.4059165 | 1.000 | -13.462930 | 18.736754 |
|         | NUA 743      | .1091812     | 4.4059165 | 1.000 | -15.990661 | 16.209023 |
|         | NUA 746      | -2.7425771   | 4.4059165 | 1.000 | -18.842419 | 13.357265 |
|         | SUGAR 113    | -4.3263747   | 4.8809775 | 1.000 | -22.162157 | 13.509407 |
|         | UBT (92) 25  | 1.4593160    | 4.4059165 | 1.000 | -14.640526 | 17.559158 |
|         | VTTT 294/4-4 | -3.3569340   | 4.6018297 | 1.000 | -20.172671 | 13.458803 |
| NUA 740 | A197         | -6.3014432   | 4.2008765 | .993  | -21.652040 | 9.049154  |
|         | A286         | -4.1296484   | 4.4059165 | 1.000 | -20.229491 | 11.970194 |
|         | A334         | -6.2218672   | 4.2008765 | .994  | -21.572464 | 9.128730  |
|         | CAL113       | -11.9141986  | 4.2008765 | .351  | -27.264796 | 3.436399  |

|         |              |              |           |       |            |           |
|---------|--------------|--------------|-----------|-------|------------|-----------|
|         | CAL 143      | -11.7652361  | 4.2008765 | .373  | -27.115833 | 3.585361  |
|         | DRK 57       | -5.8418170   | 4.2008765 | .997  | -21.192414 | 9.508780  |
|         | NASAKA       | -4.3325818   | 4.4059165 | 1.000 | -20.432424 | 11.767260 |
|         | NUA 45       | -5.9605008   | 4.2008765 | .997  | -21.311098 | 9.390096  |
|         | NUA 59       | -25.1193169* | 4.6967228 | .000  | -42.281806 | -7.956827 |
|         | NUA 674      | -3.4934175   | 5.1450020 | 1.000 | -22.293983 | 15.307148 |
|         | NUA 705      | -8.1762156   | 4.2008765 | .914  | -23.526813 | 7.174382  |
|         | NUA 706      | -3.3267228   | 4.4059165 | 1.000 | -19.426565 | 12.773119 |
|         | NUA 720      | -6.2694701   | 4.2008765 | .994  | -21.620067 | 9.081127  |
|         | NUA 730      | -2.6369123   | 4.4059165 | 1.000 | -18.736754 | 13.462930 |
|         | NUA 743      | -2.5277311   | 4.2008765 | 1.000 | -17.878328 | 12.822866 |
|         | NUA 746      | -5.3794894   | 4.2008765 | .999  | -20.730087 | 9.971108  |
|         | SUGAR 113    | -6.9632870   | 4.6967228 | .994  | -24.125776 | 10.199202 |
|         | UBT (92) 25  | -1.1775963   | 4.2008765 | 1.000 | -16.528193 | 14.173001 |
|         | VTTT 294/4-4 | -5.9938463   | 4.4059165 | .998  | -22.093688 | 10.105996 |
| NUA 743 | A197         | -3.7737121   | 4.2008765 | 1.000 | -19.124309 | 11.576885 |
|         | A286         | -1.6019173   | 4.4059165 | 1.000 | -17.701760 | 14.497925 |
|         | A334         | -3.6941360   | 4.2008765 | 1.000 | -19.044733 | 11.656461 |
|         | CAL113       | -9.3864675   | 4.2008765 | .771  | -24.737065 | 5.964130  |
|         | CAL 143      | -9.2375050   | 4.2008765 | .793  | -24.588102 | 6.113092  |
|         | DRK 57       | -3.3140859   | 4.2008765 | 1.000 | -18.664683 | 12.036511 |
|         | NASAKA       | -1.8048506   | 4.4059165 | 1.000 | -17.904693 | 14.294992 |
|         | NUA 45       | -3.4327696   | 4.2008765 | 1.000 | -18.783367 | 11.917828 |
|         | NUA 59       | -22.5915858* | 4.6967228 | .001  | -39.754075 | -5.429096 |
|         | NUA 674      | -.9656863    | 5.1450020 | 1.000 | -19.766252 | 17.834879 |
|         | NUA 705      | -5.6484845   | 4.2008765 | .998  | -20.999082 | 9.702113  |
|         | NUA 706      | -.7989917    | 4.4059165 | 1.000 | -16.898834 | 15.300850 |
|         | NUA 720      | -3.7417389   | 4.2008765 | 1.000 | -19.092336 | 11.608858 |
|         | NUA 730      | -.1091812    | 4.4059165 | 1.000 | -16.209023 | 15.990661 |
|         | NUA 740      | 2.5277311    | 4.2008765 | 1.000 | -12.822866 | 17.878328 |
|         | NUA 746      | -2.8517583   | 4.2008765 | 1.000 | -18.202356 | 12.498839 |
|         | SUGAR 113    | -4.4355559   | 4.6967228 | 1.000 | -21.598045 | 12.726934 |
|         | UBT (92) 25  | 1.3501349    | 4.2008765 | 1.000 | -14.000462 | 16.700732 |
|         | VTTT 294/4-4 | -3.4661152   | 4.4059165 | 1.000 | -19.565957 | 12.633727 |
| NUA 746 | A197         | -.9219538    | 4.2008765 | 1.000 | -16.272551 | 14.428643 |
|         | A286         | 1.2498410    | 4.4059165 | 1.000 | -14.850001 | 17.349683 |
|         | A334         | -.8423777    | 4.2008765 | 1.000 | -16.192975 | 14.508219 |
|         | CAL113       | -6.5347092   | 4.2008765 | .990  | -21.885306 | 8.815888  |
|         | CAL 143      | -6.3857467   | 4.2008765 | .992  | -21.736344 | 8.964851  |
|         | DRK 57       | -.4623276    | 4.2008765 | 1.000 | -15.812925 | 14.888270 |

|             |              |              |           |       |            |           |
|-------------|--------------|--------------|-----------|-------|------------|-----------|
|             | NASAKA       | 1.0469077    | 4.4059165 | 1.000 | -15.052935 | 17.146750 |
|             | NUA 45       | -.5810113    | 4.2008765 | 1.000 | -15.931609 | 14.769586 |
|             | NUA 59       | -19.7398275* | 4.6967228 | .009  | -36.902317 | -2.577338 |
|             | NUA 674      | 1.8860720    | 5.1450020 | 1.000 | -16.914493 | 20.686637 |
|             | NUA 705      | -2.7967262   | 4.2008765 | 1.000 | -18.147323 | 12.553871 |
|             | NUA 706      | 2.0527666    | 4.4059165 | 1.000 | -14.047076 | 18.152609 |
|             | NUA 720      | -.8899806    | 4.2008765 | 1.000 | -16.240578 | 14.460617 |
|             | NUA 730      | 2.7425771    | 4.4059165 | 1.000 | -13.357265 | 18.842419 |
|             | NUA 740      | 5.3794894    | 4.2008765 | .999  | -9.971108  | 20.730087 |
|             | NUA 743      | 2.8517583    | 4.2008765 | 1.000 | -12.498839 | 18.202356 |
|             | SUGAR 113    | -1.5837976   | 4.6967228 | 1.000 | -18.746287 | 15.578692 |
|             | UBT (92) 25  | 4.2018931    | 4.2008765 | 1.000 | -11.148704 | 19.552490 |
|             | VTTT 294/4-4 | -.6143569    | 4.4059165 | 1.000 | -16.714199 | 15.485485 |
| SUGAR 113   | A197         | .6618439     | 4.6967228 | 1.000 | -16.500646 | 17.824333 |
|             | A286         | 2.8336386    | 4.8809775 | 1.000 | -15.002144 | 20.669421 |
|             | A334         | .7414199     | 4.6967228 | 1.000 | -16.421070 | 17.903909 |
|             | CAL113       | -4.9509116   | 4.6967228 | 1.000 | -22.113401 | 12.211578 |
|             | CAL 143      | -4.8019491   | 4.6967228 | 1.000 | -21.964439 | 12.360540 |
|             | DRK 57       | 1.1214700    | 4.6967228 | 1.000 | -16.041019 | 18.283959 |
|             | NASAKA       | 2.6307053    | 4.8809775 | 1.000 | -15.205077 | 20.466487 |
|             | NUA 45       | 1.0027863    | 4.6967228 | 1.000 | -16.159703 | 18.165276 |
|             | NUA 59       | -18.1560299  | 5.1450020 | .071  | -36.956595 | .644535   |
|             | NUA 674      | 3.4698696    | 5.5572373 | 1.000 | -16.837062 | 23.776801 |
|             | NUA 705      | -1.2129286   | 4.6967228 | 1.000 | -18.375418 | 15.949561 |
|             | NUA 706      | 3.6365642    | 4.8809775 | 1.000 | -14.199218 | 21.472346 |
|             | NUA 720      | .6938170     | 4.6967228 | 1.000 | -16.468672 | 17.856306 |
|             | NUA 730      | 4.3263747    | 4.8809775 | 1.000 | -13.509407 | 22.162157 |
|             | NUA 740      | 6.9632870    | 4.6967228 | .994  | -10.199202 | 24.125776 |
|             | NUA 743      | 4.4355559    | 4.6967228 | 1.000 | -12.726934 | 21.598045 |
|             | NUA 746      | 1.5837976    | 4.6967228 | 1.000 | -15.578692 | 18.746287 |
|             | UBT (92) 25  | 5.7856908    | 4.6967228 | .999  | -11.376799 | 22.948180 |
|             | VTTT 294/4-4 | .9694408     | 4.8809775 | 1.000 | -16.866341 | 18.805223 |
| UBT (92) 25 | A197         | -5.1238469   | 4.2008765 | 1.000 | -20.474444 | 10.226750 |
|             | A286         | -2.9520522   | 4.4059165 | 1.000 | -19.051894 | 13.147790 |
|             | A334         | -5.0442709   | 4.2008765 | 1.000 | -20.394868 | 10.306326 |
|             | CAL113       | -10.7366023  | 4.2008765 | .546  | -26.087200 | 4.613995  |
|             | CAL 143      | -10.5876399  | 4.2008765 | .572  | -25.938237 | 4.762957  |
|             | DRK 57       | -4.6642207   | 4.2008765 | 1.000 | -20.014818 | 10.686376 |
|             | NASAKA       | -3.1549855   | 4.4059165 | 1.000 | -19.254828 | 12.944857 |
|             | NUA 45       | -4.7829045   | 4.2008765 | 1.000 | -20.133502 | 10.567693 |



|                 |              |              |           |       |            |           |
|-----------------|--------------|--------------|-----------|-------|------------|-----------|
|                 | NUA 59       | -23.9417206* | 4.6967228 | .000  | -41.104210 | -6.779231 |
|                 | NUA 674      | -2.3158212   | 5.1450020 | 1.000 | -21.116386 | 16.484744 |
|                 | NUA 705      | -6.9986194   | 4.2008765 | .979  | -22.349217 | 8.351978  |
|                 | NUA 706      | -2.1491265   | 4.4059165 | 1.000 | -18.248969 | 13.950716 |
|                 | NUA 720      | -5.0918738   | 4.2008765 | 1.000 | -20.442471 | 10.258723 |
|                 | NUA 730      | -1.4593160   | 4.4059165 | 1.000 | -17.559158 | 14.640526 |
|                 | NUA 740      | 1.1775963    | 4.2008765 | 1.000 | -14.173001 | 16.528193 |
|                 | NUA 743      | -1.3501349   | 4.2008765 | 1.000 | -16.700732 | 14.000462 |
|                 | NUA 746      | -4.2018931   | 4.2008765 | 1.000 | -19.552490 | 11.148704 |
|                 | SUGAR 113    | -5.7856908   | 4.6967228 | .999  | -22.948180 | 11.376799 |
|                 | VTTT 294/4-4 | -4.8162500   | 4.4059165 | 1.000 | -20.916092 | 11.283592 |
| VTTT 294/4-4    | A197         | -.3075969    | 4.4059165 | 1.000 | -16.407439 | 15.792245 |
|                 | A286         | 1.8641978    | 4.6018297 | 1.000 | -14.951539 | 18.679935 |
|                 | A334         | -.2280209    | 4.4059165 | 1.000 | -16.327863 | 15.871821 |
|                 | CAL113       | -5.9203523   | 4.4059165 | .998  | -22.020195 | 10.179490 |
|                 | CAL 143      | -5.7713898   | 4.4059165 | .999  | -21.871232 | 10.328452 |
|                 | DRK 57       | .1520293     | 4.4059165 | 1.000 | -15.947813 | 16.251871 |
|                 | NASAKA       | 1.6612645    | 4.6018297 | 1.000 | -15.154472 | 18.477001 |
|                 | NUA 45       | .0333455     | 4.4059165 | 1.000 | -16.066497 | 16.133188 |
|                 | NUA 59       | -19.1254706* | 4.8809775 | .023  | -36.961253 | -1.289688 |
|                 | NUA 674      | 2.5004288    | 5.3137352 | 1.000 | -16.916711 | 21.917569 |
|                 | NUA 705      | -2.1823694   | 4.4059165 | 1.000 | -18.282212 | 13.917473 |
|                 | NUA 706      | 2.6671235    | 4.6018297 | 1.000 | -14.148613 | 19.482860 |
|                 | NUA 720      | -.2756238    | 4.4059165 | 1.000 | -16.375466 | 15.824218 |
|                 | NUA 730      | 3.3569340    | 4.6018297 | 1.000 | -13.458803 | 20.172671 |
|                 | NUA 740      | 5.9938463    | 4.4059165 | .998  | -10.105996 | 22.093688 |
|                 | NUA 743      | 3.4661152    | 4.4059165 | 1.000 | -12.633727 | 19.565957 |
|                 | NUA 746      | .6143569     | 4.4059165 | 1.000 | -15.485485 | 16.714199 |
|                 | SUGAR 113    | -.9694408    | 4.8809775 | 1.000 | -18.805223 | 16.866341 |
|                 | UBT (92) 25  | 4.8162500    | 4.4059165 | 1.000 | -11.283592 | 20.916092 |
| Bonferroni A197 | A286         | 2.1717947    | 4.4059165 | 1.000 | -14.584244 | 18.927834 |
|                 | A334         | .0795760     | 4.2008765 | 1.000 | -15.896680 | 16.055832 |
|                 | CAL113       | -5.6127554   | 4.2008765 | 1.000 | -21.589012 | 10.363501 |
|                 | CAL 143      | -5.4637929   | 4.2008765 | 1.000 | -21.440049 | 10.512463 |
|                 | DRK 57       | .4596262     | 4.2008765 | 1.000 | -15.516630 | 16.435883 |
|                 | NASAKA       | 1.9688614    | 4.4059165 | 1.000 | -14.787178 | 18.724900 |
|                 | NUA 45       | .3409424     | 4.2008765 | 1.000 | -15.635314 | 16.317199 |
|                 | NUA 59       | -18.8178737* | 4.6967228 | .024  | -36.679871 | -.955876  |
|                 | NUA 674      | 2.8080257    | 5.1450020 | 1.000 | -16.758812 | 22.374864 |
|                 | NUA 705      | -1.8747725   | 4.2008765 | 1.000 | -17.851029 | 14.101484 |

|      |              |              |           |       |            |           |
|------|--------------|--------------|-----------|-------|------------|-----------|
|      | NUA 706      | 2.9747204    | 4.4059165 | 1.000 | -13.781319 | 19.730759 |
|      | NUA 720      | .0319731     | 4.2008765 | 1.000 | -15.944283 | 16.008229 |
|      | NUA 730      | 3.6645309    | 4.4059165 | 1.000 | -13.091508 | 20.420570 |
|      | NUA 740      | 6.3014432    | 4.2008765 | 1.000 | -9.674813  | 22.277700 |
|      | NUA 743      | 3.7737121    | 4.2008765 | 1.000 | -12.202544 | 19.749968 |
|      | NUA 746      | .9219538     | 4.2008765 | 1.000 | -15.054303 | 16.898210 |
|      | SUGAR 113    | -.6618439    | 4.6967228 | 1.000 | -18.523841 | 17.200154 |
|      | UBT (92) 25  | 5.1238469    | 4.2008765 | 1.000 | -10.852409 | 21.100103 |
|      | VTTT 294/4-4 | .3075969     | 4.4059165 | 1.000 | -16.448442 | 17.063636 |
| A286 | A197         | -2.1717947   | 4.4059165 | 1.000 | -18.927834 | 14.584244 |
|      | A334         | -2.0922187   | 4.4059165 | 1.000 | -18.848258 | 14.663820 |
|      | CAL113       | -7.7845502   | 4.4059165 | 1.000 | -24.540589 | 8.971489  |
|      | CAL 143      | -7.6355877   | 4.4059165 | 1.000 | -24.391627 | 9.120451  |
|      | DRK 57       | -1.7121685   | 4.4059165 | 1.000 | -18.468208 | 15.043871 |
|      | NASAKA       | -.2029333    | 4.6018297 | 1.000 | -17.704045 | 17.298179 |
|      | NUA 45       | -1.8308523   | 4.4059165 | 1.000 | -18.586891 | 14.925187 |
|      | NUA 59       | -20.9896685* | 4.8809775 | .008  | -39.552401 | -2.426936 |
|      | NUA 674      | .6362310     | 5.3137352 | 1.000 | -19.572312 | 20.844774 |
|      | NUA 705      | -4.0465672   | 4.4059165 | 1.000 | -20.802606 | 12.709472 |
|      | NUA 706      | .8029256     | 4.6018297 | 1.000 | -16.698186 | 18.304038 |
|      | NUA 720      | -2.1398216   | 4.4059165 | 1.000 | -18.895861 | 14.616217 |
|      | NUA 730      | 1.4927362    | 4.6018297 | 1.000 | -16.008376 | 18.993848 |
|      | NUA 740      | 4.1296484    | 4.4059165 | 1.000 | -12.626391 | 20.885687 |
|      | NUA 743      | 1.6019173    | 4.4059165 | 1.000 | -15.154122 | 18.357956 |
|      | NUA 746      | -1.2498410   | 4.4059165 | 1.000 | -18.005880 | 15.506198 |
|      | SUGAR 113    | -2.8336386   | 4.8809775 | 1.000 | -21.396371 | 15.729094 |
|      | UBT (92) 25  | 2.9520522    | 4.4059165 | 1.000 | -13.803987 | 19.708091 |
|      | VTTT 294/4-4 | -1.8641978   | 4.6018297 | 1.000 | -19.365310 | 15.636914 |
| A334 | A197         | -.0795760    | 4.2008765 | 1.000 | -16.055832 | 15.896680 |
|      | A286         | 2.0922187    | 4.4059165 | 1.000 | -14.663820 | 18.848258 |
|      | CAL113       | -5.6923315   | 4.2008765 | 1.000 | -21.668588 | 10.283925 |
|      | CAL 143      | -5.5433690   | 4.2008765 | 1.000 | -21.519625 | 10.432887 |
|      | DRK 57       | .3800502     | 4.2008765 | 1.000 | -15.596206 | 16.356307 |
|      | NASAKA       | 1.8892854    | 4.4059165 | 1.000 | -14.866754 | 18.645324 |
|      | NUA 45       | .2613664     | 4.2008765 | 1.000 | -15.714890 | 16.237623 |
|      | NUA 59       | -18.8974498* | 4.6967228 | .023  | -36.759447 | -1.035452 |
|      | NUA 674      | 2.7284497    | 5.1450020 | 1.000 | -16.838388 | 22.295288 |
|      | NUA 705      | -1.9543485   | 4.2008765 | 1.000 | -17.930605 | 14.021908 |
|      | NUA 706      | 2.8951443    | 4.4059165 | 1.000 | -13.860895 | 19.651183 |
|      | NUA 720      | -.0476029    | 4.2008765 | 1.000 | -16.023859 | 15.928653 |

|         |              |             |           |       |            |           |
|---------|--------------|-------------|-----------|-------|------------|-----------|
|         | NUA 730      | 3.5849549   | 4.4059165 | 1.000 | -13.171084 | 20.340994 |
|         | NUA 740      | 6.2218672   | 4.2008765 | 1.000 | -9.754389  | 22.198124 |
|         | NUA 743      | 3.6941360   | 4.2008765 | 1.000 | -12.282120 | 19.670392 |
|         | NUA 746      | .8423777    | 4.2008765 | 1.000 | -15.133879 | 16.818634 |
|         | SUGAR 113    | -.7414199   | 4.6967228 | 1.000 | -18.603418 | 17.120578 |
|         | UBT (92) 25  | 5.0442709   | 4.2008765 | 1.000 | -10.931985 | 21.020527 |
|         | VTTT 294/4-4 | .2280209    | 4.4059165 | 1.000 | -16.528018 | 16.984060 |
| CAL113  | A197         | 5.6127554   | 4.2008765 | 1.000 | -10.363501 | 21.589012 |
|         | A286         | 7.7845502   | 4.4059165 | 1.000 | -8.971489  | 24.540589 |
|         | A334         | 5.6923315   | 4.2008765 | 1.000 | -10.283925 | 21.668588 |
|         | CAL 143      | .1489625    | 4.2008765 | 1.000 | -15.827294 | 16.125219 |
|         | DRK 57       | 6.0723816   | 4.2008765 | 1.000 | -9.903875  | 22.048638 |
|         | NASAKA       | 7.5816168   | 4.4059165 | 1.000 | -9.174422  | 24.337656 |
|         | NUA 45       | 5.9536978   | 4.2008765 | 1.000 | -10.022559 | 21.929954 |
|         | NUA 59       | -13.2051183 | 4.6967228 | 1.000 | -31.067116 | 4.656879  |
|         | NUA 674      | 8.4207812   | 5.1450020 | 1.000 | -11.146057 | 27.987619 |
|         | NUA 705      | 3.7379830   | 4.2008765 | 1.000 | -12.238273 | 19.714239 |
|         | NUA 706      | 8.5874758   | 4.4059165 | 1.000 | -8.168563  | 25.343515 |
|         | NUA 720      | 5.6447286   | 4.2008765 | 1.000 | -10.331528 | 21.620985 |
|         | NUA 730      | 9.2772863   | 4.4059165 | 1.000 | -7.478753  | 26.033325 |
|         | NUA 740      | 11.9141986  | 4.2008765 | 1.000 | -4.062058  | 27.890455 |
|         | NUA 743      | 9.3864675   | 4.2008765 | 1.000 | -6.589789  | 25.362724 |
|         | NUA 746      | 6.5347092   | 4.2008765 | 1.000 | -9.441547  | 22.510966 |
|         | SUGAR 113    | 4.9509116   | 4.6967228 | 1.000 | -12.911086 | 22.812909 |
|         | UBT (92) 25  | 10.7366023  | 4.2008765 | 1.000 | -5.239654  | 26.712859 |
|         | VTTT 294/4-4 | 5.9203523   | 4.4059165 | 1.000 | -10.835687 | 22.676391 |
| CAL 143 | A197         | 5.4637929   | 4.2008765 | 1.000 | -10.512463 | 21.440049 |
|         | A286         | 7.6355877   | 4.4059165 | 1.000 | -9.120451  | 24.391627 |
|         | A334         | 5.5433690   | 4.2008765 | 1.000 | -10.432887 | 21.519625 |
|         | CAL113       | -.1489625   | 4.2008765 | 1.000 | -16.125219 | 15.827294 |
|         | DRK 57       | 5.9234191   | 4.2008765 | 1.000 | -10.052837 | 21.899676 |
|         | NASAKA       | 7.4326544   | 4.4059165 | 1.000 | -9.323385  | 24.188693 |
|         | NUA 45       | 5.8047354   | 4.2008765 | 1.000 | -10.171521 | 21.780992 |
|         | NUA 59       | -13.3540808 | 4.6967228 | 1.000 | -31.216078 | 4.507917  |
|         | NUA 674      | 8.2718187   | 5.1450020 | 1.000 | -11.295019 | 27.838657 |
|         | NUA 705      | 3.5890205   | 4.2008765 | 1.000 | -12.387236 | 19.565277 |
|         | NUA 706      | 8.4385133   | 4.4059165 | 1.000 | -8.317526  | 25.194552 |
|         | NUA 720      | 5.4957661   | 4.2008765 | 1.000 | -10.480490 | 21.472022 |
|         | NUA 730      | 9.1283238   | 4.4059165 | 1.000 | -7.627715  | 25.884363 |
|         | NUA 740      | 11.7652361  | 4.2008765 | 1.000 | -4.211020  | 27.741492 |

|        |              |              |           |       |            |           |
|--------|--------------|--------------|-----------|-------|------------|-----------|
|        | NUA 743      | 9.2375050    | 4.2008765 | 1.000 | -6.738751  | 25.213761 |
|        | NUA 746      | 6.3857467    | 4.2008765 | 1.000 | -9.590510  | 22.362003 |
|        | SUGAR 113    | 4.8019491    | 4.6967228 | 1.000 | -13.060049 | 22.663947 |
|        | UBT (92) 25  | 10.5876399   | 4.2008765 | 1.000 | -5.388617  | 26.563896 |
|        | VTTT 294/4-4 | 5.7713898    | 4.4059165 | 1.000 | -10.984649 | 22.527429 |
| DRK 57 | A197         | -.4596262    | 4.2008765 | 1.000 | -16.435883 | 15.516630 |
|        | A286         | 1.7121685    | 4.4059165 | 1.000 | -15.043871 | 18.468208 |
|        | A334         | -.3800502    | 4.2008765 | 1.000 | -16.356307 | 15.596206 |
|        | CAL113       | -6.0723816   | 4.2008765 | 1.000 | -22.048638 | 9.903875  |
|        | CAL 143      | -5.9234191   | 4.2008765 | 1.000 | -21.899676 | 10.052837 |
|        | NASAKA       | 1.5092352    | 4.4059165 | 1.000 | -15.246804 | 18.265274 |
|        | NUA 45       | -.1186838    | 4.2008765 | 1.000 | -16.094940 | 15.857573 |
|        | NUA 59       | -19.2774999* | 4.6967228 | .017  | -37.139498 | -1.415502 |
|        | NUA 674      | 2.3483995    | 5.1450020 | 1.000 | -17.218439 | 21.915238 |
|        | NUA 705      | -2.3343986   | 4.2008765 | 1.000 | -18.310655 | 13.641858 |
|        | NUA 706      | 2.5150942    | 4.4059165 | 1.000 | -14.240945 | 19.271133 |
|        | NUA 720      | -.4276531    | 4.2008765 | 1.000 | -16.403909 | 15.548603 |
|        | NUA 730      | 3.2049047    | 4.4059165 | 1.000 | -13.551134 | 19.960944 |
|        | NUA 740      | 5.8418170    | 4.2008765 | 1.000 | -10.134439 | 21.818073 |
|        | NUA 743      | 3.3140859    | 4.2008765 | 1.000 | -12.662171 | 19.290342 |
|        | NUA 746      | .4623276     | 4.2008765 | 1.000 | -15.513929 | 16.438584 |
|        | SUGAR 113    | -1.1214700   | 4.6967228 | 1.000 | -18.983468 | 16.740528 |
|        | UBT (92) 25  | 4.6642207    | 4.2008765 | 1.000 | -11.312036 | 20.640477 |
|        | VTTT 294/4-4 | -.1520293    | 4.4059165 | 1.000 | -16.908068 | 16.604010 |
| NASAKA | A197         | -1.9688614   | 4.4059165 | 1.000 | -18.724900 | 14.787178 |
|        | A286         | .2029333     | 4.6018297 | 1.000 | -17.298179 | 17.704045 |
|        | A334         | -1.8892854   | 4.4059165 | 1.000 | -18.645324 | 14.866754 |
|        | CAL113       | -7.5816168   | 4.4059165 | 1.000 | -24.337656 | 9.174422  |
|        | CAL 143      | -7.4326544   | 4.4059165 | 1.000 | -24.188693 | 9.323385  |
|        | DRK 57       | -1.5092352   | 4.4059165 | 1.000 | -18.265274 | 15.246804 |
|        | NUA 45       | -1.6279190   | 4.4059165 | 1.000 | -18.383958 | 15.128120 |
|        | NUA 59       | -20.7867351* | 4.8809775 | .010  | -39.349468 | -2.224003 |
|        | NUA 674      | .8391643     | 5.3137352 | 1.000 | -19.369379 | 21.047708 |
|        | NUA 705      | -3.8436339   | 4.4059165 | 1.000 | -20.599673 | 12.912405 |
|        | NUA 706      | 1.0058590    | 4.6018297 | 1.000 | -16.495253 | 18.506971 |
|        | NUA 720      | -1.9368883   | 4.4059165 | 1.000 | -18.692927 | 14.819151 |
|        | NUA 730      | 1.6956695    | 4.6018297 | 1.000 | -15.805443 | 19.196781 |
|        | NUA 740      | 4.3325818    | 4.4059165 | 1.000 | -12.423457 | 21.088621 |
|        | NUA 743      | 1.8048506    | 4.4059165 | 1.000 | -14.951188 | 18.560890 |
|        | NUA 746      | -1.0469077   | 4.4059165 | 1.000 | -17.802947 | 15.709131 |

|              |              |              |            |           |            |            |
|--------------|--------------|--------------|------------|-----------|------------|------------|
| NUA 45       | SUGAR 113    | -2.6307053   | 4.8809775  | 1.000     | -21.193438 | 15.932027  |
|              | UBT (92) 25  | 3.1549855    | 4.4059165  | 1.000     | -13.601054 | 19.911025  |
|              | VTTT 294/4-4 | -1.6612645   | 4.6018297  | 1.000     | -19.162377 | 15.839847  |
|              | A197         | -.3409424    | 4.2008765  | 1.000     | -16.317199 | 15.635314  |
|              | A286         | 1.8308523    | 4.4059165  | 1.000     | -14.925187 | 18.586891  |
|              | A334         | -.2613664    | 4.2008765  | 1.000     | -16.237623 | 15.714890  |
|              | CAL113       | -5.9536978   | 4.2008765  | 1.000     | -21.929954 | 10.022559  |
|              | CAL 143      | -5.8047354   | 4.2008765  | 1.000     | -21.780992 | 10.171521  |
|              | DRK 57       | .1186838     | 4.2008765  | 1.000     | -15.857573 | 16.094940  |
|              | NASAKA       | 1.6279190    | 4.4059165  | 1.000     | -15.128120 | 18.383958  |
|              | NUA 59       | -19.1588162* | 4.6967228  | .019      | -37.020814 | -1.296819  |
|              | NUA 674      | 2.4670833    | 5.1450020  | 1.000     | -17.099755 | 22.033921  |
|              | NUA 705      | -2.2157149   | 4.2008765  | 1.000     | -18.191971 | 13.760541  |
|              | NUA 706      | 2.6337779    | 4.4059165  | 1.000     | -14.122261 | 19.389817  |
|              | NUA 720      | -.3089693    | 4.2008765  | 1.000     | -16.285226 | 15.667287  |
|              | NUA 730      | 3.3235885    | 4.4059165  | 1.000     | -13.432451 | 20.079628  |
|              | NUA 740      | 5.9605008    | 4.2008765  | 1.000     | -10.015756 | 21.936757  |
|              | NUA 743      | 3.4327696    | 4.2008765  | 1.000     | -12.543487 | 19.409026  |
|              | NUA 746      | .5810113     | 4.2008765  | 1.000     | -15.395245 | 16.557268  |
|              | NUA 59       | SUGAR 113    | -1.0027863 | 4.6967228 | 1.000      | -18.864784 |
| UBT (92) 25  |              | 4.7829045    | 4.2008765  | 1.000     | -11.193352 | 20.759161  |
| VTTT 294/4-4 |              | -.0333455    | 4.4059165  | 1.000     | -16.789385 | 16.722694  |
| A197         |              | 18.8178737*  | 4.6967228  | .024      | .955876    | 36.679871  |
| A286         |              | 20.9896685*  | 4.8809775  | .008      | 2.426936   | 39.552401  |
| A334         |              | 18.8974498*  | 4.6967228  | .023      | 1.035452   | 36.759447  |
| CAL113       |              | 13.2051183   | 4.6967228  | 1.000     | -4.656879  | 31.067116  |
| CAL 143      |              | 13.3540808   | 4.6967228  | 1.000     | -4.507917  | 31.216078  |
| DRK 57       |              | 19.2774999*  | 4.6967228  | .017      | 1.415502   | 37.139498  |
| NASAKA       |              | 20.7867351*  | 4.8809775  | .010      | 2.224003   | 39.349468  |
| NUA 45       |              | 19.1588162*  | 4.6967228  | .019      | 1.296819   | 37.020814  |
| NUA 674      |              | 21.6258995*  | 5.5572373  | .037      | .491299    | 42.760500  |
| NUA 705      |              | 16.9431013   | 4.6967228  | .097      | -.918896   | 34.805099  |
| NUA 706      |              | 21.7925941*  | 4.8809775  | .004      | 3.229862   | 40.355327  |
| NUA 720      |              | 18.8498469*  | 4.6967228  | .024      | .987849    | 36.711844  |
| NUA 730      |              | 22.4824046*  | 4.8809775  | .003      | 3.919672   | 41.045137  |
| NUA 740      |              | 25.1193169*  | 4.6967228  | .000      | 7.257319   | 42.981315  |
| NUA 743      |              | 22.5915858*  | 4.6967228  | .001      | 4.729588   | 40.453583  |
| NUA 746      |              | 19.7398275*  | 4.6967228  | .012      | 1.877830   | 37.601825  |
| SUGAR 113    |              | 18.1560299   | 5.1450020  | .127      | -1.410808  | 37.722868  |
| UBT (92) 25  | 23.9417206*  | 4.6967228    | .000       | 6.079723  | 41.803718  |            |

|             |              |              |            |           |            |            |           |
|-------------|--------------|--------------|------------|-----------|------------|------------|-----------|
|             | VTTT 294/4-4 | 19.1254706*  | 4.8809775  | .033      | .562738    | 37.688203  |           |
| NUA 674     | A197         | -2.8080257   | 5.1450020  | 1.000     | -22.374864 | 16.758812  |           |
|             | A286         | -.6362310    | 5.3137352  | 1.000     | -20.844774 | 19.572312  |           |
|             | A334         | -2.7284497   | 5.1450020  | 1.000     | -22.295288 | 16.838388  |           |
|             | CAL113       | -8.4207812   | 5.1450020  | 1.000     | -27.987619 | 11.146057  |           |
|             | CAL 143      | -8.2718187   | 5.1450020  | 1.000     | -27.838657 | 11.295019  |           |
|             | DRK 57       | -2.3483995   | 5.1450020  | 1.000     | -21.915238 | 17.218439  |           |
|             | NASAKA       | -.8391643    | 5.3137352  | 1.000     | -21.047708 | 19.369379  |           |
|             | NUA 45       | -2.4670833   | 5.1450020  | 1.000     | -22.033921 | 17.099755  |           |
|             | NUA 59       | -21.6258995* | 5.5572373  | .037      | -42.760500 | -.491299   |           |
|             | NUA 705      | -4.6827982   | 5.1450020  | 1.000     | -24.249636 | 14.884040  |           |
|             | NUA 706      | .1666946     | 5.3137352  | 1.000     | -20.041849 | 20.375238  |           |
|             | NUA 720      | -2.7760526   | 5.1450020  | 1.000     | -22.342891 | 16.790785  |           |
|             | NUA 730      | .8565052     | 5.3137352  | 1.000     | -19.352038 | 21.065049  |           |
|             | NUA 740      | 3.4934175    | 5.1450020  | 1.000     | -16.073421 | 23.060256  |           |
|             | NUA 743      | .9656863     | 5.1450020  | 1.000     | -18.601152 | 20.532524  |           |
|             | NUA 746      | -1.8860720   | 5.1450020  | 1.000     | -21.452910 | 17.680766  |           |
|             | SUGAR 113    | -3.4698696   | 5.5572373  | 1.000     | -24.604470 | 17.664731  |           |
|             | UBT (92) 25  | 2.3158212    | 5.1450020  | 1.000     | -17.251017 | 21.882659  |           |
|             |              | VTTT 294/4-4 | -2.5004288 | 5.3137352 | 1.000      | -22.708972 | 17.708115 |
|             | NUA 705      | A197         | 1.8747725  | 4.2008765 | 1.000      | -14.101484 | 17.851029 |
| A286        |              | 4.0465672    | 4.4059165  | 1.000     | -12.709472 | 20.802606  |           |
| A334        |              | 1.9543485    | 4.2008765  | 1.000     | -14.021908 | 17.930605  |           |
| CAL113      |              | -3.7379830   | 4.2008765  | 1.000     | -19.714239 | 12.238273  |           |
| CAL 143     |              | -3.5890205   | 4.2008765  | 1.000     | -19.565277 | 12.387236  |           |
| DRK 57      |              | 2.3343986    | 4.2008765  | 1.000     | -13.641858 | 18.310655  |           |
| NASAKA      |              | 3.8436339    | 4.4059165  | 1.000     | -12.912405 | 20.599673  |           |
| NUA 45      |              | 2.2157149    | 4.2008765  | 1.000     | -13.760541 | 18.191971  |           |
| NUA 59      |              | -16.9431013  | 4.6967228  | .097      | -34.805099 | .918896    |           |
| NUA 674     |              | 4.6827982    | 5.1450020  | 1.000     | -14.884040 | 24.249636  |           |
| NUA 706     |              | 4.8494928    | 4.4059165  | 1.000     | -11.906546 | 21.605532  |           |
| NUA 720     |              | 1.9067456    | 4.2008765  | 1.000     | -14.069511 | 17.883002  |           |
| NUA 730     |              | 5.5393033    | 4.4059165  | 1.000     | -11.216736 | 22.295342  |           |
| NUA 740     |              | 8.1762156    | 4.2008765  | 1.000     | -7.800041  | 24.152472  |           |
| NUA 743     |              | 5.6484845    | 4.2008765  | 1.000     | -10.327772 | 21.624741  |           |
| NUA 746     |              | 2.7967262    | 4.2008765  | 1.000     | -13.179530 | 18.772983  |           |
| SUGAR 113   |              | 1.2129286    | 4.6967228  | 1.000     | -16.649069 | 19.074926  |           |
| UBT (92) 25 |              | 6.9986194    | 4.2008765  | 1.000     | -8.977637  | 22.974876  |           |
|             |              | VTTT 294/4-4 | 2.1823694  | 4.4059165 | 1.000      | -14.573670 | 18.938408 |
| NUA 706     |              | A197         | -2.9747204 | 4.4059165 | 1.000      | -19.730759 | 13.781319 |

|         |              |              |           |       |            |           |
|---------|--------------|--------------|-----------|-------|------------|-----------|
|         | A286         | -0.8029256   | 4.6018297 | 1.000 | -18.304038 | 16.698186 |
|         | A334         | -2.8951443   | 4.4059165 | 1.000 | -19.651183 | 13.860895 |
|         | CAL113       | -8.5874758   | 4.4059165 | 1.000 | -25.343515 | 8.168563  |
|         | CAL 143      | -8.4385133   | 4.4059165 | 1.000 | -25.194552 | 8.317526  |
|         | DRK 57       | -2.5150942   | 4.4059165 | 1.000 | -19.271133 | 14.240945 |
|         | NASAKA       | -1.0058590   | 4.6018297 | 1.000 | -18.506971 | 16.495253 |
|         | NUA 45       | -2.6337779   | 4.4059165 | 1.000 | -19.389817 | 14.122261 |
|         | NUA 59       | -21.7925941* | 4.8809775 | .004  | -40.355327 | -3.229862 |
|         | NUA 674      | -.1666946    | 5.3137352 | 1.000 | -20.375238 | 20.041849 |
|         | NUA 705      | -4.8494928   | 4.4059165 | 1.000 | -21.605532 | 11.906546 |
|         | NUA 720      | -2.9427472   | 4.4059165 | 1.000 | -19.698786 | 13.813292 |
|         | NUA 730      | .6898105     | 4.6018297 | 1.000 | -16.811301 | 18.190923 |
|         | NUA 740      | 3.3267228    | 4.4059165 | 1.000 | -13.429316 | 20.082762 |
|         | NUA 743      | .7989917     | 4.4059165 | 1.000 | -15.957047 | 17.555031 |
|         | NUA 746      | -2.0527666   | 4.4059165 | 1.000 | -18.808806 | 14.703272 |
|         | SUGAR 113    | -3.6365642   | 4.8809775 | 1.000 | -22.199297 | 14.926168 |
|         | UBT (92) 25  | 2.1491265    | 4.4059165 | 1.000 | -14.606913 | 18.905166 |
|         | VTTT 294/4-4 | -2.6671235   | 4.6018297 | 1.000 | -20.168235 | 14.833989 |
| NUA 720 | A197         | -.0319731    | 4.2008765 | 1.000 | -16.008229 | 15.944283 |
|         | A286         | 2.1398216    | 4.4059165 | 1.000 | -14.616217 | 18.895861 |
|         | A334         | .0476029     | 4.2008765 | 1.000 | -15.928653 | 16.023859 |
|         | CAL113       | -5.6447286   | 4.2008765 | 1.000 | -21.620985 | 10.331528 |
|         | CAL 143      | -5.4957661   | 4.2008765 | 1.000 | -21.472022 | 10.480490 |
|         | DRK 57       | .4276531     | 4.2008765 | 1.000 | -15.548603 | 16.403909 |
|         | NASAKA       | 1.9368883    | 4.4059165 | 1.000 | -14.819151 | 18.692927 |
|         | NUA 45       | .3089693     | 4.2008765 | 1.000 | -15.667287 | 16.285226 |
|         | NUA 59       | -18.8498469* | 4.6967228 | .024  | -36.711844 | -.987849  |
|         | NUA 674      | 2.7760526    | 5.1450020 | 1.000 | -16.790785 | 22.342891 |
|         | NUA 705      | -1.9067456   | 4.2008765 | 1.000 | -17.883002 | 14.069511 |
|         | NUA 706      | 2.9427472    | 4.4059165 | 1.000 | -13.813292 | 19.698786 |
|         | NUA 730      | 3.6325578    | 4.4059165 | 1.000 | -13.123481 | 20.388597 |
|         | NUA 740      | 6.2694701    | 4.2008765 | 1.000 | -9.706786  | 22.245726 |
|         | NUA 743      | 3.7417389    | 4.2008765 | 1.000 | -12.234517 | 19.717995 |
|         | NUA 746      | .8899806     | 4.2008765 | 1.000 | -15.086276 | 16.866237 |
|         | SUGAR 113    | -.6938170    | 4.6967228 | 1.000 | -18.555815 | 17.168181 |
|         | UBT (92) 25  | 5.0918738    | 4.2008765 | 1.000 | -10.884383 | 21.068130 |
|         | VTTT 294/4-4 | .2756238     | 4.4059165 | 1.000 | -16.480415 | 17.031663 |
| NUA 730 | A197         | -3.6645309   | 4.4059165 | 1.000 | -20.420570 | 13.091508 |
|         | A286         | -1.4927362   | 4.6018297 | 1.000 | -18.993848 | 16.008376 |
|         | A334         | -3.5849549   | 4.4059165 | 1.000 | -20.340994 | 13.171084 |

|         |              |              |           |       |            |           |
|---------|--------------|--------------|-----------|-------|------------|-----------|
|         | CAL113       | -9.2772863   | 4.4059165 | 1.000 | -26.033325 | 7.478753  |
|         | CAL 143      | -9.1283238   | 4.4059165 | 1.000 | -25.884363 | 7.627715  |
|         | DRK 57       | -3.2049047   | 4.4059165 | 1.000 | -19.960944 | 13.551134 |
|         | NASAKA       | -1.6956695   | 4.6018297 | 1.000 | -19.196781 | 15.805443 |
|         | NUA 45       | -3.3235885   | 4.4059165 | 1.000 | -20.079628 | 13.432451 |
|         | NUA 59       | -22.4824046* | 4.8809775 | .003  | -41.045137 | -3.919672 |
|         | NUA 674      | -.8565052    | 5.3137352 | 1.000 | -21.065049 | 19.352038 |
|         | NUA 705      | -5.5393033   | 4.4059165 | 1.000 | -22.295342 | 11.216736 |
|         | NUA 706      | -.6898105    | 4.6018297 | 1.000 | -18.190923 | 16.811301 |
|         | NUA 720      | -3.6325578   | 4.4059165 | 1.000 | -20.388597 | 13.123481 |
|         | NUA 740      | 2.6369123    | 4.4059165 | 1.000 | -14.119127 | 19.392951 |
|         | NUA 743      | .1091812     | 4.4059165 | 1.000 | -16.646858 | 16.865220 |
|         | NUA 746      | -2.7425771   | 4.4059165 | 1.000 | -19.498616 | 14.013462 |
|         | SUGAR 113    | -4.3263747   | 4.8809775 | 1.000 | -22.889107 | 14.236358 |
|         | UBT (92) 25  | 1.4593160    | 4.4059165 | 1.000 | -15.296723 | 18.215355 |
|         | VTTT 294/4-4 | -3.3569340   | 4.6018297 | 1.000 | -20.858046 | 14.144178 |
| NUA 740 | A197         | -6.3014432   | 4.2008765 | 1.000 | -22.277700 | 9.674813  |
|         | A286         | -4.1296484   | 4.4059165 | 1.000 | -20.885687 | 12.626391 |
|         | A334         | -6.2218672   | 4.2008765 | 1.000 | -22.198124 | 9.754389  |
|         | CAL113       | -11.9141986  | 4.2008765 | 1.000 | -27.890455 | 4.062058  |
|         | CAL 143      | -11.7652361  | 4.2008765 | 1.000 | -27.741492 | 4.211020  |
|         | DRK 57       | -5.8418170   | 4.2008765 | 1.000 | -21.818073 | 10.134439 |
|         | NASAKA       | -4.3325818   | 4.4059165 | 1.000 | -21.088621 | 12.423457 |
|         | NUA 45       | -5.9605008   | 4.2008765 | 1.000 | -21.936757 | 10.015756 |
|         | NUA 59       | -25.1193169* | 4.6967228 | .000  | -42.981315 | -7.257319 |
|         | NUA 674      | -3.4934175   | 5.1450020 | 1.000 | -23.060256 | 16.073421 |
|         | NUA 705      | -8.1762156   | 4.2008765 | 1.000 | -24.152472 | 7.800041  |
|         | NUA 706      | -3.3267228   | 4.4059165 | 1.000 | -20.082762 | 13.429316 |
|         | NUA 720      | -6.2694701   | 4.2008765 | 1.000 | -22.245726 | 9.706786  |
|         | NUA 730      | -2.6369123   | 4.4059165 | 1.000 | -19.392951 | 14.119127 |
|         | NUA 743      | -2.5277311   | 4.2008765 | 1.000 | -18.503987 | 13.448525 |
|         | NUA 746      | -5.3794894   | 4.2008765 | 1.000 | -21.355746 | 10.596767 |
|         | SUGAR 113    | -6.9632870   | 4.6967228 | 1.000 | -24.825285 | 10.898711 |
|         | UBT (92) 25  | -1.1775963   | 4.2008765 | 1.000 | -17.153853 | 14.798660 |
|         | VTTT 294/4-4 | -5.9938463   | 4.4059165 | 1.000 | -22.749885 | 10.762193 |
| NUA 743 | A197         | -3.7737121   | 4.2008765 | 1.000 | -19.749968 | 12.202544 |
|         | A286         | -1.6019173   | 4.4059165 | 1.000 | -18.357956 | 15.154122 |
|         | A334         | -3.6941360   | 4.2008765 | 1.000 | -19.670392 | 12.282120 |
|         | CAL113       | -9.3864675   | 4.2008765 | 1.000 | -25.362724 | 6.589789  |
|         | CAL 143      | -9.2375050   | 4.2008765 | 1.000 | -25.213761 | 6.738751  |



|           |              |              |           |       |            |           |
|-----------|--------------|--------------|-----------|-------|------------|-----------|
|           | DRK 57       | -3.3140859   | 4.2008765 | 1.000 | -19.290342 | 12.662171 |
|           | NASAKA       | -1.8048506   | 4.4059165 | 1.000 | -18.560890 | 14.951188 |
|           | NUA 45       | -3.4327696   | 4.2008765 | 1.000 | -19.409026 | 12.543487 |
|           | NUA 59       | -22.5915858* | 4.6967228 | .001  | -40.453583 | -4.729588 |
|           | NUA 674      | -.9656863    | 5.1450020 | 1.000 | -20.532524 | 18.601152 |
|           | NUA 705      | -5.6484845   | 4.2008765 | 1.000 | -21.624741 | 10.327772 |
|           | NUA 706      | -.7989917    | 4.4059165 | 1.000 | -17.555031 | 15.957047 |
|           | NUA 720      | -3.7417389   | 4.2008765 | 1.000 | -19.717995 | 12.234517 |
|           | NUA 730      | -.1091812    | 4.4059165 | 1.000 | -16.865220 | 16.646858 |
|           | NUA 740      | 2.5277311    | 4.2008765 | 1.000 | -13.448525 | 18.503987 |
|           | NUA 746      | -2.8517583   | 4.2008765 | 1.000 | -18.828015 | 13.124498 |
|           | SUGAR 113    | -4.4355559   | 4.6967228 | 1.000 | -22.297554 | 13.426442 |
|           | UBT (92) 25  | 1.3501349    | 4.2008765 | 1.000 | -14.626122 | 17.326391 |
|           | VTTT 294/4-4 | -3.4661152   | 4.4059165 | 1.000 | -20.222154 | 13.289924 |
| NUA 746   | A197         | -.9219538    | 4.2008765 | 1.000 | -16.898210 | 15.054303 |
|           | A286         | 1.2498410    | 4.4059165 | 1.000 | -15.506198 | 18.005880 |
|           | A334         | -.8423777    | 4.2008765 | 1.000 | -16.818634 | 15.133879 |
|           | CAL113       | -6.5347092   | 4.2008765 | 1.000 | -22.510966 | 9.441547  |
|           | CAL 143      | -6.3857467   | 4.2008765 | 1.000 | -22.362003 | 9.590510  |
|           | DRK 57       | -.4623276    | 4.2008765 | 1.000 | -16.438584 | 15.513929 |
|           | NASAKA       | 1.0469077    | 4.4059165 | 1.000 | -15.709131 | 17.802947 |
|           | NUA 45       | -.5810113    | 4.2008765 | 1.000 | -16.557268 | 15.395245 |
|           | NUA 59       | -19.7398275* | 4.6967228 | .012  | -37.601825 | -1.877830 |
|           | NUA 674      | 1.8860720    | 5.1450020 | 1.000 | -17.680766 | 21.452910 |
|           | NUA 705      | -2.7967262   | 4.2008765 | 1.000 | -18.772983 | 13.179530 |
|           | NUA 706      | 2.0527666    | 4.4059165 | 1.000 | -14.703272 | 18.808806 |
|           | NUA 720      | -.8899806    | 4.2008765 | 1.000 | -16.866237 | 15.086276 |
|           | NUA 730      | 2.7425771    | 4.4059165 | 1.000 | -14.013462 | 19.498616 |
|           | NUA 740      | 5.3794894    | 4.2008765 | 1.000 | -10.596767 | 21.355746 |
|           | NUA 743      | 2.8517583    | 4.2008765 | 1.000 | -13.124498 | 18.828015 |
|           | SUGAR 113    | -1.5837976   | 4.6967228 | 1.000 | -19.445795 | 16.278200 |
|           | UBT (92) 25  | 4.2018931    | 4.2008765 | 1.000 | -11.774363 | 20.178150 |
|           | VTTT 294/4-4 | -.6143569    | 4.4059165 | 1.000 | -17.370396 | 16.141682 |
| SUGAR 113 | A197         | .6618439     | 4.6967228 | 1.000 | -17.200154 | 18.523841 |
|           | A286         | 2.8336386    | 4.8809775 | 1.000 | -15.729094 | 21.396371 |
|           | A334         | .7414199     | 4.6967228 | 1.000 | -17.120578 | 18.603418 |
|           | CAL113       | -4.9509116   | 4.6967228 | 1.000 | -22.812909 | 12.911086 |
|           | CAL 143      | -4.8019491   | 4.6967228 | 1.000 | -22.663947 | 13.060049 |
|           | DRK 57       | 1.1214700    | 4.6967228 | 1.000 | -16.740528 | 18.983468 |
|           | NASAKA       | 2.6307053    | 4.8809775 | 1.000 | -15.932027 | 21.193438 |

|              |              |              |           |       |            |           |
|--------------|--------------|--------------|-----------|-------|------------|-----------|
|              | NUA 45       | 1.0027863    | 4.6967228 | 1.000 | -16.859211 | 18.864784 |
|              | NUA 59       | -18.1560299  | 5.1450020 | .127  | -37.722868 | 1.410808  |
|              | NUA 674      | 3.4698696    | 5.5572373 | 1.000 | -17.664731 | 24.604470 |
|              | NUA 705      | -1.2129286   | 4.6967228 | 1.000 | -19.074926 | 16.649069 |
|              | NUA 706      | 3.6365642    | 4.8809775 | 1.000 | -14.926168 | 22.199297 |
|              | NUA 720      | .6938170     | 4.6967228 | 1.000 | -17.168181 | 18.555815 |
|              | NUA 730      | 4.3263747    | 4.8809775 | 1.000 | -14.236358 | 22.889107 |
|              | NUA 740      | 6.9632870    | 4.6967228 | 1.000 | -10.898711 | 24.825285 |
|              | NUA 743      | 4.4355559    | 4.6967228 | 1.000 | -13.426442 | 22.297554 |
|              | NUA 746      | 1.5837976    | 4.6967228 | 1.000 | -16.278200 | 19.445795 |
|              | UBT (92) 25  | 5.7856908    | 4.6967228 | 1.000 | -12.076307 | 23.647688 |
|              | VTTT 294/4-4 | .9694408     | 4.8809775 | 1.000 | -17.593292 | 19.532173 |
| UBT (92) 25  | A197         | -5.1238469   | 4.2008765 | 1.000 | -21.100103 | 10.852409 |
|              | A286         | -2.9520522   | 4.4059165 | 1.000 | -19.708091 | 13.803987 |
|              | A334         | -5.0442709   | 4.2008765 | 1.000 | -21.020527 | 10.931985 |
|              | CAL113       | -10.7366023  | 4.2008765 | 1.000 | -26.712859 | 5.239654  |
|              | CAL 143      | -10.5876399  | 4.2008765 | 1.000 | -26.563896 | 5.388617  |
|              | DRK 57       | -4.6642207   | 4.2008765 | 1.000 | -20.640477 | 11.312036 |
|              | NASAKA       | -3.1549855   | 4.4059165 | 1.000 | -19.911025 | 13.601054 |
|              | NUA 45       | -4.7829045   | 4.2008765 | 1.000 | -20.759161 | 11.193352 |
|              | NUA 59       | -23.9417206* | 4.6967228 | .000  | -41.803718 | -6.079723 |
|              | NUA 674      | -2.3158212   | 5.1450020 | 1.000 | -21.882659 | 17.251017 |
|              | NUA 705      | -6.9986194   | 4.2008765 | 1.000 | -22.974876 | 8.977637  |
|              | NUA 706      | -2.1491265   | 4.4059165 | 1.000 | -18.905166 | 14.606913 |
|              | NUA 720      | -5.0918738   | 4.2008765 | 1.000 | -21.068130 | 10.884383 |
|              | NUA 730      | -1.4593160   | 4.4059165 | 1.000 | -18.215355 | 15.296723 |
|              | NUA 740      | 1.1775963    | 4.2008765 | 1.000 | -14.798660 | 17.153853 |
|              | NUA 743      | -1.3501349   | 4.2008765 | 1.000 | -17.326391 | 14.626122 |
|              | NUA 746      | -4.2018931   | 4.2008765 | 1.000 | -20.178150 | 11.774363 |
|              | SUGAR 113    | -5.7856908   | 4.6967228 | 1.000 | -23.647688 | 12.076307 |
|              | VTTT 294/4-4 | -4.8162500   | 4.4059165 | 1.000 | -21.572289 | 11.939789 |
| VTTT 294/4-4 | A197         | -.3075969    | 4.4059165 | 1.000 | -17.063636 | 16.448442 |
|              | A286         | 1.8641978    | 4.6018297 | 1.000 | -15.636914 | 19.365310 |
|              | A334         | -.2280209    | 4.4059165 | 1.000 | -16.984060 | 16.528018 |
|              | CAL113       | -5.9203523   | 4.4059165 | 1.000 | -22.676391 | 10.835687 |
|              | CAL 143      | -5.7713898   | 4.4059165 | 1.000 | -22.527429 | 10.984649 |
|              | DRK 57       | .1520293     | 4.4059165 | 1.000 | -16.604010 | 16.908068 |
|              | NASAKA       | 1.6612645    | 4.6018297 | 1.000 | -15.839847 | 19.162377 |
|              | NUA 45       | .0333455     | 4.4059165 | 1.000 | -16.722694 | 16.789385 |
|              | NUA 59       | -19.1254706* | 4.8809775 | .033  | -37.688203 | -.562738  |

|             |            |           |       |            |           |
|-------------|------------|-----------|-------|------------|-----------|
| NUA 674     | 2.5004288  | 5.3137352 | 1.000 | -17.708115 | 22.708972 |
| NUA 705     | -2.1823694 | 4.4059165 | 1.000 | -18.938408 | 14.573670 |
| NUA 706     | 2.6671235  | 4.6018297 | 1.000 | -14.833989 | 20.168235 |
| NUA 720     | -.2756238  | 4.4059165 | 1.000 | -17.031663 | 16.480415 |
| NUA 730     | 3.3569340  | 4.6018297 | 1.000 | -14.144178 | 20.858046 |
| NUA 740     | 5.9938463  | 4.4059165 | 1.000 | -10.762193 | 22.749885 |
| NUA 743     | 3.4661152  | 4.4059165 | 1.000 | -13.289924 | 20.222154 |
| NUA 746     | .6143569   | 4.4059165 | 1.000 | -16.141682 | 17.370396 |
| SUGAR 113   | -.9694408  | 4.8809775 | 1.000 | -19.532173 | 17.593292 |
| UBT (92) 25 | 4.8162500  | 4.4059165 | 1.000 | -11.939789 | 21.572289 |

\*. The mean difference is significant at the 0.05 level.

## Homogeneous Subsets

### Zn66\_ppm

|                          | Variety      | N | Subset for alpha = 0.05 |           |
|--------------------------|--------------|---|-------------------------|-----------|
|                          |              |   | 1                       | 2         |
| Tukey HSD <sup>a,b</sup> | NUA 740      | 6 | 32.455731               |           |
|                          | UBT (92) 25  | 6 | 33.633328               |           |
|                          | NUA 743      | 6 | 34.983463               |           |
|                          | NUA 730      | 5 | 35.092644               |           |
|                          | NUA 706      | 5 | 35.782454               |           |
|                          | NUA 674      | 3 | 35.949149               |           |
|                          | A286         | 5 | 36.585380               |           |
|                          | NASAKA       | 5 | 36.788313               |           |
|                          | NUA 746      | 6 | 37.835221               |           |
|                          | DRK 57       | 6 | 38.297548               |           |
|                          | NUA 45       | 6 | 38.416232               |           |
|                          | VTTT 294/4-4 | 5 | 38.449578               |           |
|                          | A334         | 6 | 38.677599               |           |
|                          | NUA 720      | 6 | 38.725201               |           |
|                          | A197         | 6 | 38.757175               |           |
|                          | SUGAR 113    | 4 | 39.419018               |           |
|                          | NUA 705      | 6 | 40.631947               |           |
|                          | CAL 143      | 6 | 44.220968               | 44.220968 |
|                          | CAL113       | 6 | 44.369930               | 44.369930 |
|                          | NUA 59       | 4 |                         | 57.575048 |
| Sig.                     |              |   | .481                    | .275      |

Means for groups in homogeneous subsets are displayed.

- a. Uses Harmonic Mean Sample Size = 5.217.
- b. The group sizes are unequal. The harmonic mean of the group sizes is used. Type I error levels are not guaranteed.

```

USE ALL.
COMPUTE filter_$=(Condition = 1).
VARIABLE LABELS filter_$ 'Condition = 1 (FILTER)'.
VALUE LABELS filter_$ 0 'Not Selected' 1 'Selected'.
FORMATS filter_$ (f1.0).
FILTER BY filter_$.
EXECUTE.
ONEWAY LG10_Pb208 BY Variety
  /STATISTICS HOMOGENEITY
  /MISSING ANALYSIS
  /POSTHOC=TUKEY BONFERRONI ALPHA(0.05).

```

## Oneway

### Notes

|                        |                                                                                                                              |                                                                                                                 |
|------------------------|------------------------------------------------------------------------------------------------------------------------------|-----------------------------------------------------------------------------------------------------------------|
| Output Created         |                                                                                                                              | 23-NOV-2017 18:36:09                                                                                            |
| Comments               |                                                                                                                              |                                                                                                                 |
| Input                  | Data                                                                                                                         | C:\Users\Brendan\Documents\Mi<br>cronutrients\Yield and<br>micronutirents<br>variety+condition+season.sav       |
|                        | Active Dataset                                                                                                               | DataSet1                                                                                                        |
|                        | Filter                                                                                                                       | Condition = 1 (FILTER)                                                                                          |
|                        | Weight                                                                                                                       | <none>                                                                                                          |
|                        | Split File                                                                                                                   | <none>                                                                                                          |
|                        | N of Rows in Working Data File                                                                                               | 120                                                                                                             |
| Missing Value Handling | Definition of Missing                                                                                                        | User-defined missing values are<br>treated as missing.                                                          |
|                        | Cases Used                                                                                                                   | Statistics for each analysis are<br>based on cases with no missing<br>data for any variable in the<br>analysis. |
| Syntax                 | ONEWAY LG10_Pb208 BY<br>Variety<br>/STATISTICS HOMOGENEITY<br>/MISSING ANALYSIS<br>/POSTHOC=TUKEY<br>BONFERRONI ALPHA(0.05). |                                                                                                                 |
| Resources              | Processor Time                                                                                                               | 00:00:00.09                                                                                                     |
|                        | Elapsed Time                                                                                                                 | 00:00:00.10                                                                                                     |

## Test of Homogeneity of Variances

LG10\_Pb208

| Levene Statistic | df1 | df2 | Sig. |
|------------------|-----|-----|------|
| 1.464            | 19  | 100 | .116 |

## ANOVA

LG10\_Pb208

|                | Sum of Squares | df  | Mean Square | F    | Sig. |
|----------------|----------------|-----|-------------|------|------|
| Between Groups | 1.273          | 19  | .067        | .818 | .682 |
| Within Groups  | 8.195          | 100 | .082        |      |      |
| Total          | 9.468          | 119 |             |      |      |

```
USE ALL.
COMPUTE filter_$=(Condition = 2).
VARIABLE LABELS filter_$ 'Condition = 2 (FILTER)'.
VALUE LABELS filter_$ 0 'Not Selected' 1 'Selected'.
FORMATS filter_$ (f1.0).
FILTER BY filter_$.
EXECUTE.
ONEWAY LG10_Pb208 BY Variety
  /STATISTICS HOMOGENEITY
  /MISSING ANALYSIS
  /POSTHOC=TUKEY BONFERRONI ALPHA(0.05).
```

## Oneway

### Notes

|                        |                                |                                                                                                           |
|------------------------|--------------------------------|-----------------------------------------------------------------------------------------------------------|
| Output Created         |                                | 23-NOV-2017 18:37:21                                                                                      |
| Comments               |                                |                                                                                                           |
| Input                  | Data                           | C:\Users\Brendan\Documents\Mi<br>cronutrients\Yield and<br>micronutirents<br>variety+condition+season.sav |
|                        | Active Dataset                 | DataSet1                                                                                                  |
|                        | Filter                         | Condition = 2 (FILTER)                                                                                    |
|                        | Weight                         | <none>                                                                                                    |
|                        | Split File                     | <none>                                                                                                    |
|                        | N of Rows in Working Data File | 120                                                                                                       |
| Missing Value Handling | Definition of Missing          | User-defined missing values are<br>treated as missing.                                                    |

|            |                |                                                                                                                           |
|------------|----------------|---------------------------------------------------------------------------------------------------------------------------|
| Cases Used |                | Statistics for each analysis are based on cases with no missing data for any variable in the analysis.                    |
| Syntax     |                | ONEWAY LG10_Pb208 BY Variety<br>/STATISTICS HOMOGENEITY<br>/MISSING ANALYSIS<br>/POSTHOC=TUKEY<br>BONFERRONI ALPHA(0.05). |
| Resources  | Processor Time | 00:00:00.14                                                                                                               |
|            | Elapsed Time   | 00:00:00.10                                                                                                               |

### Test of Homogeneity of Variances

LG10\_Pb208

| Levene Statistic | df1 | df2 | Sig. |
|------------------|-----|-----|------|
| .469             | 19  | 90  | .969 |

### ANOVA

LG10\_Pb208

|                | Sum of Squares | df  | Mean Square | F    | Sig.  |
|----------------|----------------|-----|-------------|------|-------|
| Between Groups | 1.402          | 19  | .074        | .195 | 1.000 |
| Within Groups  | 34.068         | 90  | .379        |      |       |
| Total          | 35.470         | 109 |             |      |       |

```
USE ALL.
COMPUTE filter_$=(Condition = 1).
VARIABLE LABELS filter_$ 'Condition = 1 (FILTER)'.
VALUE LABELS filter_$ 0 'Not Selected' 1 'Selected'.
FORMATS filter_$ (f1.0).
FILTER BY filter_$.
EXECUTE.
ONEWAY Phytic_acid_percent BY Variety
  /STATISTICS HOMOGENEITY
  /MISSING ANALYSIS
  /POSTHOC=TUKEY BONFERRONI ALPHA(0.05).
```

### Oneway

#### Test of Homogeneity of Variances

Phytic\_acid\_percent

| Levene Statistic | df1 | df2 | Sig. |
|------------------|-----|-----|------|
| 1.398            | 19  | 99  | .146 |

## ANOVA

Phytic\_acid\_percent

|                | Sum of Squares | df  | Mean Square | F    | Sig. |
|----------------|----------------|-----|-------------|------|------|
| Between Groups | 1.690          | 19  | .089        | .879 | .609 |
| Within Groups  | 10.020         | 99  | .101        |      |      |
| Total          | 11.710         | 118 |             |      |      |

```
USE ALL.
COMPUTE filter_$=(Condition = 2).
VARIABLE LABELS filter_$ 'Condition = 2 (FILTER)'.
VALUE LABELS filter_$ 0 'Not Selected' 1 'Selected'.
FORMATS filter_$ (f1.0).
FILTER BY filter_$.
EXECUTE.
ONEWAY Phytic_acid_percent BY Variety
  /STATISTICS HOMOGENEITY
  /MISSING ANALYSIS
  /POSTHOC=TUKEY BONFERRONI ALPHA(0.05).
```

## Oneway

### Notes

|                        |                                |                                                                                                                 |
|------------------------|--------------------------------|-----------------------------------------------------------------------------------------------------------------|
| Output Created         |                                | 23-NOV-2017 18:41:09                                                                                            |
| Comments               |                                |                                                                                                                 |
| Input                  | Data                           | C:\Users\Brendan\Documents\Mi<br>cronutrients\Yield and<br>micronutirents<br>variety+condition+season.sav       |
|                        | Active Dataset                 | DataSet1                                                                                                        |
|                        | Filter                         | Condition = 2 (FILTER)                                                                                          |
|                        | Weight                         | <none>                                                                                                          |
|                        | Split File                     | <none>                                                                                                          |
|                        | N of Rows in Working Data File | 120                                                                                                             |
| Missing Value Handling | Definition of Missing          | User-defined missing values are<br>treated as missing.                                                          |
|                        | Cases Used                     | Statistics for each analysis are<br>based on cases with no missing<br>data for any variable in the<br>analysis. |

|           |                                                                                                                                       |
|-----------|---------------------------------------------------------------------------------------------------------------------------------------|
| Syntax    | ONEWAY Phytic_acid_percent<br>BY Variety<br>/STATISTICS HOMOGENEITY<br>/MISSING ANALYSIS<br>/POSTHOC=TUKEY<br>BONFERRONI ALPHA(0.05). |
| Resources | Processor Time 00:00:00.08<br>Elapsed Time 00:00:00.10                                                                                |

### Test of Homogeneity of Variances

Phytic\_acid\_percent

| Levene Statistic | df1 | df2 | Sig. |
|------------------|-----|-----|------|
| 1.515            | 19  | 90  | .099 |

### ANOVA

Phytic\_acid\_percent

|                | Sum of Squares | df  | Mean Square | F     | Sig. |
|----------------|----------------|-----|-------------|-------|------|
| Between Groups | 2.041          | 19  | .107        | 1.425 | .135 |
| Within Groups  | 6.784          | 90  | .075        |       |      |
| Total          | 8.826          | 109 |             |       |      |

```
USE ALL.
COMPUTE filter_$=(Condition = 1).
VARIABLE LABELS filter_$ 'Condition = 1 (FILTER)'.
VALUE LABELS filter_$ 0 'Not Selected' 1 'Selected'.
FORMATS filter_$ (f1.0).
FILTER BY filter_$.
EXECUTE.
ONEWAY Total_protein_mg_per_g_dw BY Variety
  /STATISTICS HOMOGENEITY
  /MISSING ANALYSIS
  /POSTHOC=TUKEY ALPHA(0.05).
```

### Oneway

#### Notes

|                |                      |
|----------------|----------------------|
| Output Created | 05-JUN-2018 12:14:27 |
| Comments       |                      |



|                        |                                |                                                                                                                                     |
|------------------------|--------------------------------|-------------------------------------------------------------------------------------------------------------------------------------|
| Input                  | Data                           | C:\Users\Brendan\Documents\Mi<br>cronutrients\Yield and<br>micronutirents<br>variety+condition+season.sav                           |
|                        | Active Dataset                 | DataSet1                                                                                                                            |
|                        | Filter                         | Condition = 1 (FILTER)                                                                                                              |
|                        | Weight                         | <none>                                                                                                                              |
|                        | Split File                     | <none>                                                                                                                              |
|                        | N of Rows in Working Data File | 120                                                                                                                                 |
| Missing Value Handling | Definition of Missing          | User-defined missing values are<br>treated as missing.                                                                              |
|                        | Cases Used                     | Statistics for each analysis are<br>based on cases with no missing<br>data for any variable in the<br>analysis.                     |
| Syntax                 |                                | ONEWAY<br>Total_protein_mg_per_g_dw BY<br>Variety<br>/STATISTICS HOMOGENEITY<br>/MISSING ANALYSIS<br>/POSTHOC=TUKEY<br>ALPHA(0.05). |
| Resources              | Processor Time                 | 00:00:00.13                                                                                                                         |
|                        | Elapsed Time                   | 00:00:00.27                                                                                                                         |

### Test of Homogeneity of Variances

Total\_protein\_mg\_per\_g\_dw

| Levene Statistic | df1 | df2 | Sig. |
|------------------|-----|-----|------|
| .776             | 19  | 100 | .729 |

### ANOVA

Total\_protein\_mg\_per\_g\_dw

|                | Sum of Squares | df  | Mean Square | F    | Sig. |
|----------------|----------------|-----|-------------|------|------|
| Between Groups | 87453.353      | 19  | 4602.808    | .890 | .596 |
| Within Groups  | 517161.686     | 100 | 5171.617    |      |      |
| Total          | 604615.039     | 119 |             |      |      |

```

USE ALL.
COMPUTE filter_$=(Condition = 2).
VARIABLE LABELS filter_$ 'Condition = 2 (FILTER)'.
VALUE LABELS filter_$ 0 'Not Selected' 1 'Selected'.
FORMATS filter_$ (f1.0).
FILTER BY filter_$.
EXECUTE.
ONEWAY Total_protein_mg_per_g_dw BY Variety
  /STATISTICS HOMOGENEITY
  /MISSING ANALYSIS
  /POSTHOC=TUKEY ALPHA(0.05).

```

## Oneway

### Notes

|                        |                                                                                                                                     |                                                                                                                 |
|------------------------|-------------------------------------------------------------------------------------------------------------------------------------|-----------------------------------------------------------------------------------------------------------------|
| Output Created         |                                                                                                                                     | 05-JUN-2018 12:14:58                                                                                            |
| Comments               |                                                                                                                                     |                                                                                                                 |
| Input                  | Data                                                                                                                                | C:\Users\Brendan\Documents\Mi<br>cronutrients\Yield and<br>micronutirents<br>variety+condition+season.sav       |
|                        | Active Dataset                                                                                                                      | DataSet1                                                                                                        |
|                        | Filter                                                                                                                              | Condition = 2 (FILTER)                                                                                          |
|                        | Weight                                                                                                                              | <none>                                                                                                          |
|                        | Split File                                                                                                                          | <none>                                                                                                          |
|                        | N of Rows in Working Data File                                                                                                      | 120                                                                                                             |
| Missing Value Handling | Definition of Missing                                                                                                               | User-defined missing values are<br>treated as missing.                                                          |
|                        | Cases Used                                                                                                                          | Statistics for each analysis are<br>based on cases with no missing<br>data for any variable in the<br>analysis. |
| Syntax                 | ONEWAY<br>Total_protein_mg_per_g_dw BY<br>Variety<br>/STATISTICS HOMOGENEITY<br>/MISSING ANALYSIS<br>/POSTHOC=TUKEY<br>ALPHA(0.05). |                                                                                                                 |
| Resources              | Processor Time                                                                                                                      | 00:00:00.06                                                                                                     |
|                        | Elapsed Time                                                                                                                        | 00:00:00.08                                                                                                     |

### Test of Homogeneity of Variances

Total\_protein\_mg\_per\_g\_dw

| Levene Statistic | df1 | df2 | Sig. |
|------------------|-----|-----|------|
| 1.962            | 19  | 90  | .018 |

### ANOVA

Total\_protein\_mg\_per\_g\_dw

|                | Sum of Squares | df  | Mean Square | F    | Sig. |
|----------------|----------------|-----|-------------|------|------|
| Between Groups | 86000.983      | 19  | 4526.368    | .770 | .736 |
| Within Groups  | 529360.208     | 90  | 5881.780    |      |      |
| Total          | 615361.191     | 109 |             |      |      |

#### 4) Two-tailed independent samples t-test statistical analysis

```
GET
  FILE='C:\Users\Brendan\Documents\Micronutrients\Yield and micronutirents
variety+condition+season.sav'.
DATASET NAME DataSet1 WINDOW=FRONT.
T-TEST GROUPS=Condition(1 2)
  /MISSING=ANALYSIS
  /VARIABLES=SQRT_Yield
  /CRITERIA=CI(.95).
```

#### T-Test

[DataSet1] C:\Users\Brendan\Documents\Micronutrients\Yield and  
micronutirents variety+condition+season.sav

#### Group Statistics

|            | Condition | N   | Mean      | Std. Deviation | Std. Error Mean |
|------------|-----------|-----|-----------|----------------|-----------------|
| SQRT_Yield | Rainfed   | 119 | 30.499820 | 6.9553653      | .6375973        |
|            | Drought   | 117 | 17.005767 | 9.5655866      | .8843388        |

## Independent Samples Test

|            |                             | Levene's Test for Equality of Variances |      |        |         |                 | t-test for Equality of Means |                       | 95% Confidence Interval of the Difference |            |
|------------|-----------------------------|-----------------------------------------|------|--------|---------|-----------------|------------------------------|-----------------------|-------------------------------------------|------------|
|            |                             | F                                       | Sig. | t      | df      | Sig. (2-tailed) | Mean Difference              | Std. Error Difference | Lower                                     | Upper      |
| SQRT_Yield | Equal variances assumed     | 15.801                                  | .000 | 12.410 | 234     | .000            | 13.4940526                   | 1.0873658             | 11.3517749                                | 15.6363303 |
|            | Equal variances not assumed |                                         |      | 12.377 | 211.707 | .000            | 13.4940526                   | 1.0902226             | 11.3449701                                | 15.6431351 |

```
T-TEST GROUPS=Condition(1 2)
/MISSING=ANALYSIS
/VARIABLES=Fe56_ppm
/CRITERIA=CI(.95).
```

## T-Test

### Group Statistics

|          | Condition | N   | Mean      | Std. Deviation | Std. Error Mean |
|----------|-----------|-----|-----------|----------------|-----------------|
| Fe56_ppm | Rainfed   | 120 | 58.192493 | 6.1808271      | .5642297        |
|          | Drought   | 110 | 54.705894 | 9.0187895      | .8599078        |

## Independent Samples Test

|          |                             | Levene's Test for Equality of Variances |      | t-test for Equality of Means |         |                 |                 |                       |                                           |           |
|----------|-----------------------------|-----------------------------------------|------|------------------------------|---------|-----------------|-----------------|-----------------------|-------------------------------------------|-----------|
|          |                             | F                                       | Sig. | t                            | df      | Sig. (2-tailed) | Mean Difference | Std. Error Difference | 95% Confidence Interval of the Difference |           |
|          |                             |                                         |      |                              |         |                 |                 |                       | Lower                                     | Upper     |
| Fe56_ppm | Equal variances assumed     | 25.032                                  | .000 | 3.444                        | 228     | .001            | 3.4865990       | 1.0124103             | 1.4917223                                 | 5.4814757 |
|          | Equal variances not assumed |                                         |      | 3.390                        | 190.686 | .001            | 3.4865990       | 1.0284924             | 1.4579154                                 | 5.5152826 |

```
T-TEST GROUPS=Condition(1 2)
/MISSING=ANALYSIS
/VARIABLES=Zn66_ppm
/CRITERIA=CI(.95).
```

## T-Test

### Group Statistics

|          | Condition | N   | Mean      | Std. Deviation | Std. Error Mean |
|----------|-----------|-----|-----------|----------------|-----------------|
| Zn66_ppm | Rainfed   | 119 | 35.357169 | 7.8696258      | .7214074        |
|          | Drought   | 108 | 38.660570 | 8.1642780      | .7856080        |

## Independent Samples Test

|          |                             | Levene's Test for Equality of Variances |      | t-test for Equality of Means |         |                 |                 |                       |                                           |            |
|----------|-----------------------------|-----------------------------------------|------|------------------------------|---------|-----------------|-----------------|-----------------------|-------------------------------------------|------------|
|          |                             | F                                       | Sig. | t                            | df      | Sig. (2-tailed) | Mean Difference | Std. Error Difference | 95% Confidence Interval of the Difference |            |
|          |                             |                                         |      |                              |         |                 |                 |                       | Lower                                     | Upper      |
| Zn66_ppm | Equal variances assumed     | .332                                    | .565 | -3.103                       | 225     | .002            | -3.3034019      | 1.0646817             | -5.4014246                                | -1.2053793 |
|          | Equal variances not assumed |                                         |      | -3.097                       | 221.026 | .002            | -3.3034019      | 1.0665874             | -5.4053844                                | -1.2014195 |

```
T-TEST GROUPS=Condition(1 2)
/MISSING=ANALYSIS
/VARIABLES=LG10_Pb208
/CRITERIA=CI(.95).
```

## T-Test

### Group Statistics

|            | Condition | N   | Mean    | Std. Deviation | Std. Error Mean |
|------------|-----------|-----|---------|----------------|-----------------|
| LG10_Pb208 | Rainfed   | 120 | -1.5150 | .28207         | .02575          |
|            | Drought   | 110 | -.9692  | .57045         | .05439          |

## Independent Samples Test

|            |                             | Levene's Test for Equality of Variances |      | t-test for Equality of Means |         |                 |                 |                       |                                           |         |
|------------|-----------------------------|-----------------------------------------|------|------------------------------|---------|-----------------|-----------------|-----------------------|-------------------------------------------|---------|
|            |                             | F                                       | Sig. | t                            | df      | Sig. (2-tailed) | Mean Difference | Std. Error Difference | 95% Confidence Interval of the Difference |         |
|            |                             |                                         |      |                              |         |                 |                 |                       | Lower                                     | Upper   |
| LG10_Pb208 | Equal variances assumed     | 74.321                                  | .000 | -9.315                       | 228     | .000            | -.54589         | .05860                | -.66136                                   | -.43042 |
|            | Equal variances not assumed |                                         |      | -9.071                       | 156.151 | .000            | -.54589         | .06018                | -.66475                                   | -.42702 |

```
T-TEST GROUPS=Condition(1 2)
/MISSING=ANALYSIS
/VARIABLES=Phytic_acid_percent
/CRITERIA=CI(.95).
```

## T-Test

### Group Statistics

|                     | Condition | N   | Mean   | Std. Deviation | Std. Error Mean |
|---------------------|-----------|-----|--------|----------------|-----------------|
| Phytic_acid_percent | Rainfed   | 119 | .9607  | .31502         | .02888          |
|                     | Drought   | 110 | 1.1559 | .28455         | .02713          |



## Independent Samples Test

|                     |                             | Levene's Test for<br>Equality of Variances |      | t-test for Equality of Means |         |                 |                    |                          |                                              |         |
|---------------------|-----------------------------|--------------------------------------------|------|------------------------------|---------|-----------------|--------------------|--------------------------|----------------------------------------------|---------|
|                     |                             | F                                          | Sig. | t                            | df      | Sig. (2-tailed) | Mean<br>Difference | Std. Error<br>Difference | 95% Confidence Interval of the<br>Difference |         |
|                     |                             |                                            |      |                              |         |                 |                    |                          | Lower                                        | Upper   |
| Phytic_acid_percent | Equal variances assumed     | .675                                       | .412 | -4.907                       | 227     | .000            | -.19519            | .03978                   | -.27358                                      | -.11680 |
|                     | Equal variances not assumed |                                            |      | -4.926                       | 226.883 | .000            | -.19519            | .03962                   | -.27327                                      | -.11711 |

```
T-TEST GROUPS=Condition(1 2)
/MISSING=ANALYSIS
/VARIABLES=Total_protein_mg_per_g_dw
/CRITERIA=CI (.95) .
```

## T-Test

### Notes

Output Created

05-JUN-2018 12:07:11

Comments

|                        |                                |                                                                                                                                     |
|------------------------|--------------------------------|-------------------------------------------------------------------------------------------------------------------------------------|
| Input                  | Data                           | C:\Users\Brendan\Documents\Mi<br>cronutrients\Yield and<br>micronutirents<br>variety+condition+season.sav                           |
|                        | Active Dataset                 | DataSet1                                                                                                                            |
|                        | Filter                         | <none>                                                                                                                              |
|                        | Weight                         | <none>                                                                                                                              |
|                        | Split File                     | <none>                                                                                                                              |
|                        | N of Rows in Working Data File | 240                                                                                                                                 |
| Missing Value Handling | Definition of Missing          | User defined missing values are<br>treated as missing.                                                                              |
|                        | Cases Used                     | Statistics for each analysis are<br>based on the cases with no<br>missing or out-of-range data for<br>any variable in the analysis. |
| Syntax                 |                                | T-TEST GROUPS=Condition(1<br>2)<br>/MISSING=ANALYSIS<br><br>/VARIABLES=Total_protein_mg_<br>per_g_dw<br>/CRITERIA=CI(.95).          |
| Resources              | Processor Time                 | 00:00:00.02                                                                                                                         |
|                        | Elapsed Time                   | 00:00:00.22                                                                                                                         |

### Group Statistics

|                           | Condition | N   | Mean     | Std. Deviation | Std. Error Mean |
|---------------------------|-----------|-----|----------|----------------|-----------------|
| Total_protein_mg_per_g_dw | Rainfed   | 120 | 325.5642 | 71.27972       | 6.50692         |
|                           | Drought   | 110 | 370.9681 | 75.13665       | 7.16400         |

### Independent Samples Test

|                           |                             | Levene's Test for Equality of Variances |      | t-test for Equality of Means |         |                 |                 |                       |                                           |           |
|---------------------------|-----------------------------|-----------------------------------------|------|------------------------------|---------|-----------------|-----------------|-----------------------|-------------------------------------------|-----------|
|                           |                             | F                                       | Sig. | t                            | df      | Sig. (2-tailed) | Mean Difference | Std. Error Difference | 95% Confidence Interval of the Difference |           |
|                           |                             |                                         |      |                              |         |                 |                 |                       | Lower                                     | Upper     |
| Total_protein_mg_per_g_dw | Equal variances assumed     | .074                                    | .786 | -4.702                       | 228     | .000            | -45.40393       | 9.65573               | -64.42981                                 | -26.37805 |
|                           | Equal variances not assumed |                                         |      | -4.691                       | 223.623 | .000            | -45.40393       | 9.67796               | -64.47560                                 | -26.33227 |

## 5) Multiple linear regression statistical analysis

```

REGRESSION
  /DESCRIPTIVES MEAN STDDEV CORR SIG N
  /MISSING LISTWISE
  /STATISTICS COEFF OUTS CI(95) R ANOVA COLLIN TOL
  /CRITERIA=PIN(.05) POUT(.10)
  /NOORIGIN
  /DEPENDENT SQRT_Yield
  /METHOD=STEPWISE Avg_Rain_Flowering_to_harvest Min_Temp_Flowering_to_harvest
    Max_Temp_Flowering_to_harvest Avg_Temp_Flowering_to_harvest
  /SCATTERPLOT=(*ZRESID ,*ZPRED)
  /RESIDUALS HISTOGRAM(ZRESID) NORMPROB(ZRESID)
  /CASEWISE PLOT(ZRESID) OUTLIERS(3)
  /SAVE PRED COOK ZRESID.

```

## Regression

### Notes

|                        |                                |                                                                                                           |
|------------------------|--------------------------------|-----------------------------------------------------------------------------------------------------------|
| Output Created         | 22-NOV-2017 17:41:59           |                                                                                                           |
| Comments               |                                |                                                                                                           |
| Input                  | Data                           | C:\Users\Brendan\Documents\Mi<br>cronutrients\Yield and<br>micronutirents<br>variety+condition+season.sav |
|                        | Active Dataset                 | DataSet1                                                                                                  |
|                        | Filter                         | <none>                                                                                                    |
|                        | Weight                         | <none>                                                                                                    |
|                        | Split File                     | <none>                                                                                                    |
|                        | N of Rows in Working Data File | 240                                                                                                       |
| Missing Value Handling | Definition of Missing          | User-defined missing values are<br>treated as missing.                                                    |
|                        | Cases Used                     | Statistics are based on cases<br>with no missing values for any<br>variable used.                         |

|                               |                                               |                                                                                                                                                                                                                                                                                                                                                                                                                                                                                                                                            |
|-------------------------------|-----------------------------------------------|--------------------------------------------------------------------------------------------------------------------------------------------------------------------------------------------------------------------------------------------------------------------------------------------------------------------------------------------------------------------------------------------------------------------------------------------------------------------------------------------------------------------------------------------|
| Syntax                        |                                               | REGRESSION<br>/DESCRIPTIVES MEAN<br>STDDEV CORR SIG N<br>/MISSING LISTWISE<br>/STATISTICS COEFF OUTS<br>CI(95) R ANOVA COLLIN TOL<br>/CRITERIA=PIN(.05)<br>POUT(.10)<br>/NOORIGIN<br>/DEPENDENT SQRT_Yield<br>/METHOD=STEPWISE<br>Avg_Rain_Flowering_to_harvest<br>Min_Temp_Flowering_to_harvest<br><br>Max_Temp_Flowering_to_harvest<br>Avg_Temp_Flowering_to_harvest<br><br>/SCATTERPLOT=(*ZRESID<br>,*ZPRED)<br>/RESIDUALS<br>HISTOGRAM(ZRESID)<br>NORMPROB(ZRESID)<br>/CASEWISE PLOT(ZRESID)<br>OUTLIERS(3)<br>/SAVE PRED COOK ZRESID. |
| Resources                     | Processor Time                                | 00:00:00.48                                                                                                                                                                                                                                                                                                                                                                                                                                                                                                                                |
|                               | Elapsed Time                                  | 00:00:00.47                                                                                                                                                                                                                                                                                                                                                                                                                                                                                                                                |
|                               | Memory Required                               | 6384 bytes                                                                                                                                                                                                                                                                                                                                                                                                                                                                                                                                 |
|                               | Additional Memory Required for Residual Plots | 632 bytes                                                                                                                                                                                                                                                                                                                                                                                                                                                                                                                                  |
| Variables Created or Modified | PRE_2                                         | Unstandardized Predicted Value                                                                                                                                                                                                                                                                                                                                                                                                                                                                                                             |
|                               | ZRE_2                                         | Standardized Residual                                                                                                                                                                                                                                                                                                                                                                                                                                                                                                                      |
|                               | COO_2                                         | Cook's Distance                                                                                                                                                                                                                                                                                                                                                                                                                                                                                                                            |

### Descriptive Statistics

|                               | Mean      | Std. Deviation | N   |
|-------------------------------|-----------|----------------|-----|
| SQRT_Yield                    | 23.809972 | 10.7317498     | 236 |
| Avg_Rain_Flowering_to_harvest | 53.8276   | 34.36238       | 236 |
| Min_Temp_Flowering_to_harvest | 10.6373   | 1.26826        | 236 |
| Max_Temp_Flowering_to_harvest | 32.5750   | 2.55866        | 236 |
| Avg_Temp_Flowering_to_harvest | 22.6624   | 1.46309        | 236 |

### Correlations

|                     |                               | SQRT_Yield | Avg_Rain_Flowering_to_harvest | Min_Temp_Flowering_to_harvest | Max_Temp_Flowering_to_harvest | Avg_Temp_Flowering_to_harvest |
|---------------------|-------------------------------|------------|-------------------------------|-------------------------------|-------------------------------|-------------------------------|
| Pearson Correlation | SQRT_Yield                    | 1.000      | .118                          | -.619                         | -.661                         | -.743                         |
|                     | Avg_Rain_Flowering_to_harvest | .118       | 1.000                         | -.311                         | -.666                         | -.223                         |
|                     | Min_Temp_Flowering_to_harvest | -.619      | -.311                         | 1.000                         | .733                          | .847                          |

|                 |                               |       |       |      |       |       |
|-----------------|-------------------------------|-------|-------|------|-------|-------|
|                 | Max_Temp_Flowering_to_harvest | -.661 | -.666 | .733 | 1.000 | .779  |
|                 | Avg_Temp_Flowering_to_harvest | -.743 | -.223 | .847 | .779  | 1.000 |
| Sig. (1-tailed) | SQRT_Yield                    | .     | .035  | .000 | .000  | .000  |
|                 | Avg_Rain_Flowering_to_harvest | .035  | .     | .000 | .000  | .000  |
|                 | Min_Temp_Flowering_to_harvest | .000  | .000  | .    | .000  | .000  |
|                 | Max_Temp_Flowering_to_harvest | .000  | .000  | .000 | .     | .000  |
|                 | Avg_Temp_Flowering_to_harvest | .000  | .000  | .000 | .000  | .     |
|                 |                               |       |       |      |       |       |
| N               | SQRT_Yield                    | 236   | 236   | 236  | 236   | 236   |
|                 | Avg_Rain_Flowering_to_harvest | 236   | 236   | 236  | 236   | 236   |
|                 | Min_Temp_Flowering_to_harvest | 236   | 236   | 236  | 236   | 236   |
|                 | Max_Temp_Flowering_to_harvest | 236   | 236   | 236  | 236   | 236   |
|                 | Avg_Temp_Flowering_to_harvest | 236   | 236   | 236  | 236   | 236   |
|                 |                               |       |       |      |       |       |

### Variables Entered/Removed<sup>a</sup>

| Model | Variables Entered             | Variables Removed | Method                                                                                      |
|-------|-------------------------------|-------------------|---------------------------------------------------------------------------------------------|
| 1     | Avg_Temp_Flowering_to_harvest | .                 | Stepwise (Criteria: Probability-of-F-to-enter <= .050, Probability-of-F-to-remove >= .100). |
| 2     | Max_Temp_Flowering_to_harvest | .                 | Stepwise (Criteria: Probability-of-F-to-enter <= .050, Probability-of-F-to-remove >= .100). |
| 3     | Avg_Rain_Flowering_to_harvest | .                 | Stepwise (Criteria: Probability-of-F-to-enter <= .050, Probability-of-F-to-remove >= .100). |

a. Dependent Variable: SQRT\_Yield

### Model Summary<sup>d</sup>

| Model | R                 | R Square | Adjusted R Square | Std. Error of the Estimate |
|-------|-------------------|----------|-------------------|----------------------------|
| 1     | .743 <sup>a</sup> | .553     | .551              | 7.1926234                  |
| 2     | .755 <sup>b</sup> | .570     | .566              | 7.0686335                  |
| 3     | .798 <sup>c</sup> | .637     | .633              | 6.5040637                  |

a. Predictors: (Constant), Avg\_Temp\_Flowering\_to\_harvest

b. Predictors: (Constant), Avg\_Temp\_Flowering\_to\_harvest, Max\_Temp\_Flowering\_to\_harvest

c. Predictors: (Constant), Avg\_Temp\_Flowering\_to\_harvest, Max\_Temp\_Flowering\_to\_harvest, Avg\_Rain\_Flowering\_to\_harvest

d. Dependent Variable: SQRT\_Yield

### ANOVA<sup>a</sup>

| Model |            | Sum of Squares | df  | Mean Square | F       | Sig.              |
|-------|------------|----------------|-----|-------------|---------|-------------------|
| 1     | Regression | 14959.340      | 1   | 14959.340   | 289.160 | .000 <sup>b</sup> |
|       | Residual   | 12105.717      | 234 | 51.734      |         |                   |
|       | Total      | 27065.057      | 235 |             |         |                   |
| 2     | Regression | 15423.077      | 2   | 7711.538    | 154.337 | .000 <sup>c</sup> |
|       | Residual   | 11641.980      | 233 | 49.966      |         |                   |
|       | Total      | 27065.057      | 235 |             |         |                   |
| 3     | Regression | 17250.797      | 3   | 5750.266    | 135.931 | .000 <sup>d</sup> |
|       | Residual   | 9814.260       | 232 | 42.303      |         |                   |
|       | Total      | 27065.057      | 235 |             |         |                   |

a. Dependent Variable: SQRT\_Yield

b. Predictors: (Constant), Avg\_Temp\_Flowering\_to\_harvest

c. Predictors: (Constant), Avg\_Temp\_Flowering\_to\_harvest, Max\_Temp\_Flowering\_to\_harvest

d. Predictors: (Constant), Avg\_Temp\_Flowering\_to\_harvest, Max\_Temp\_Flowering\_to\_harvest,  
Avg\_Rain\_Flowering\_to\_harvest

### Coefficients<sup>a</sup>

| Model |                               | Unstandardized Coefficients |            | Standardized | t       | Sig. | 95.0% Confidence Interval for B |             | Collinearity Statistics |       |
|-------|-------------------------------|-----------------------------|------------|--------------|---------|------|---------------------------------|-------------|-------------------------|-------|
|       |                               | B                           | Std. Error | Beta         |         |      | Lower Bound                     | Upper Bound | Tolerance               | VIF   |
| 1     | (Constant)                    | 147.393                     | 7.283      |              | 20.239  | .000 | 133.045                         | 161.741     |                         |       |
|       | Avg_Temp_Flowering_to_harvest | -5.453                      | .321       | -.743        | -17.005 | .000 | -6.085                          | -4.821      | 1.000                   | 1.000 |
| 2     | (Constant)                    | 148.868                     | 7.173      |              | 20.753  | .000 | 134.735                         | 163.001     |                         |       |
|       | Avg_Temp_Flowering_to_harvest | -4.259                      | .503       | -.581        | -8.465  | .000 | -5.250                          | -3.267      | .392                    | 2.548 |
|       | Max_Temp_Flowering_to_harvest | -.876                       | .288       | -.209        | -3.046  | .003 | -1.443                          | -.310       | .392                    | 2.548 |
| 3     | (Constant)                    | 177.065                     | 7.872      |              | 22.493  | .000 | 161.555                         | 192.574     |                         |       |
|       | Avg_Temp_Flowering_to_harvest | -1.777                      | .597       | -.242        | -2.975  | .003 | -2.954                          | -.600       | .236                    | 4.243 |
|       | Max_Temp_Flowering_to_harvest | -3.236                      | .446       | -.772        | -7.255  | .000 | -4.115                          | -2.358      | .138                    | 7.237 |
|       | Avg_Rain_Flowering_to_harvest | -.140                       | .021       | -.449        | -6.573  | .000 | -.182                           | -.098       | .335                    | 2.989 |

a. Dependent Variable: SQRT\_Yield

### Excluded Variables<sup>a</sup>

| Model |                               | Beta In            | t      | Sig. | Partial Correlation | Collinearity Statistics |       |                   |
|-------|-------------------------------|--------------------|--------|------|---------------------|-------------------------|-------|-------------------|
|       |                               |                    |        |      |                     | Tolerance               | VIF   | Minimum Tolerance |
| 1     | Avg_Rain_Flowering_to_harvest | -.050 <sup>b</sup> | -1.118 | .265 | -.073               | .950                    | 1.052 | .950              |
|       | Min_Temp_Flowering_to_harvest | .040 <sup>b</sup>  | .483   | .629 | .032                | .282                    | 3.541 | .282              |
|       | Max_Temp_Flowering_to_harvest | -.209 <sup>b</sup> | -3.046 | .003 | -.196               | .392                    | 2.548 | .392              |
| 2     | Avg_Rain_Flowering_to_harvest | -.449 <sup>c</sup> | -6.573 | .000 | -.396               | .335                    | 2.989 | .138              |
|       | Min_Temp_Flowering_to_harvest | .098 <sup>c</sup>  | 1.188  | .236 | .078                | .269                    | 3.719 | .228              |
| 3     | Min_Temp_Flowering_to_harvest | .047 <sup>d</sup>  | .615   | .539 | .040                | .266                    | 3.758 | .138              |

a. Dependent Variable: SQRT\_Yield

b. Predictors in the Model: (Constant), Avg\_Temp\_Flowering\_to\_harvest

c. Predictors in the Model: (Constant), Avg\_Temp\_Flowering\_to\_harvest, Max\_Temp\_Flowering\_to\_harvest

d. Predictors in the Model: (Constant), Avg\_Temp\_Flowering\_to\_harvest, Max\_Temp\_Flowering\_to\_harvest, Avg\_Rain\_Flowering\_to\_harvest



### Collinearity Diagnostics<sup>a</sup>

| Model | Dimension | Eigenvalue | Condition Index | (Constant) | Variance Proportions              |                                   |                                   |
|-------|-----------|------------|-----------------|------------|-----------------------------------|-----------------------------------|-----------------------------------|
|       |           |            |                 |            | Avg_Temp_Flowe<br>ring_to_harvest | Max_Temp_Flowe<br>ring_to_harvest | Avg_Rain_Floweri<br>ng_to_harvest |
| 1     | 1         | 1.998      | 1.000           | .00        | .00                               |                                   |                                   |
|       | 2         | .002       | 31.077          | 1.00       | 1.00                              |                                   |                                   |
| 2     | 1         | 2.996      | 1.000           | .00        | .00                               | .00                               |                                   |
|       | 2         | .003       | 30.688          | .80        | .02                               | .26                               |                                   |
|       | 3         | .001       | 53.689          | .20        | .98                               | .74                               |                                   |
| 3     | 1         | 3.748      | 1.000           | .00        | .00                               | .00                               | .01                               |
|       | 2         | .249       | 3.877           | .00        | .00                               | .00                               | .30                               |
|       | 3         | .002       | 41.781          | .91        | .11                               | .03                               | .10                               |
|       | 4         | .000       | 88.671          | .09        | .89                               | .97                               | .59                               |

a. Dependent Variable: SQRT\_Yield

### Residuals Statistics<sup>a</sup>

|                                   | Minimum     | Maximum    | Mean      | Std. Deviation | N   |
|-----------------------------------|-------------|------------|-----------|----------------|-----|
| Predicted Value                   | 9.422302    | 34.096153  | 23.809972 | 8.5678262      | 236 |
| Std. Predicted Value              | -1.679      | 1.201      | .000      | 1.000          | 236 |
| Standard Error of Predicted Value | .737        | 2.110      | .841      | .099           | 236 |
| Adjusted Predicted Value          | 9.356224    | 34.362850  | 23.810308 | 8.5684730      | 236 |
| Residual                          | -17.7492199 | 16.9452763 | .0000000  | 6.4624150      | 236 |
| Std. Residual                     | -2.729      | 2.605      | .000      | .994           | 236 |
| Stud. Residual                    | -2.749      | 2.625      | .000      | 1.002          | 236 |

|                         |             |            |           |           |     |
|-------------------------|-------------|------------|-----------|-----------|-----|
| Deleted Residual        | -18.0159168 | 17.2054539 | -.0003362 | 6.5681072 | 236 |
| Stud. Deleted Residual  | -2.789      | 2.659      | .000      | 1.007     | 236 |
| Mahal. Distance         | 2.022       | 23.730     | 2.987     | 1.450     | 236 |
| Cook's Distance         | .000        | .028       | .004      | .006      | 236 |
| Centered Leverage Value | .009        | .101       | .013      | .006      | 236 |

a. Dependent Variable: SQRT\_Yield

## Charts

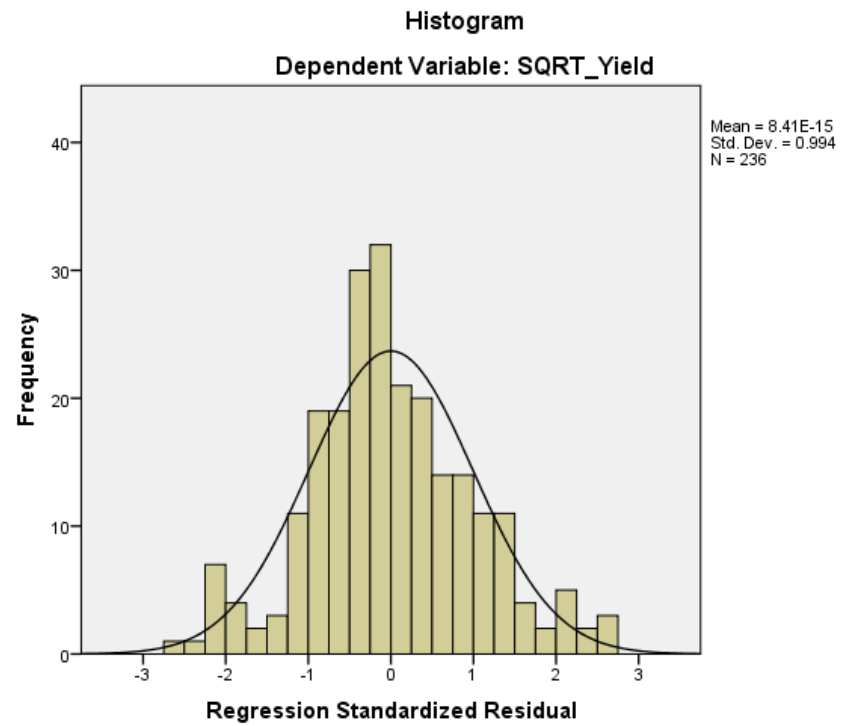

Normal P-P Plot of Regression Standardized Residual

Dependent Variable: SQRT\_Yield

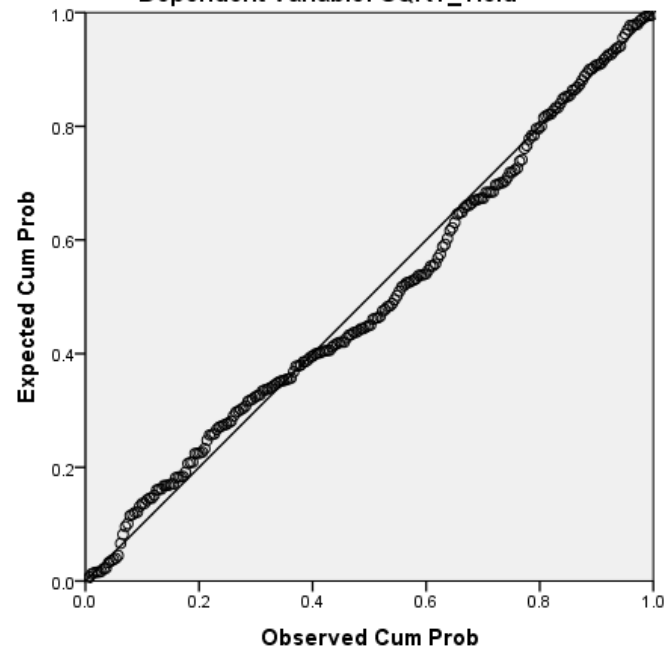

### Scatterplot

Dependent Variable: SQRT\_Yield

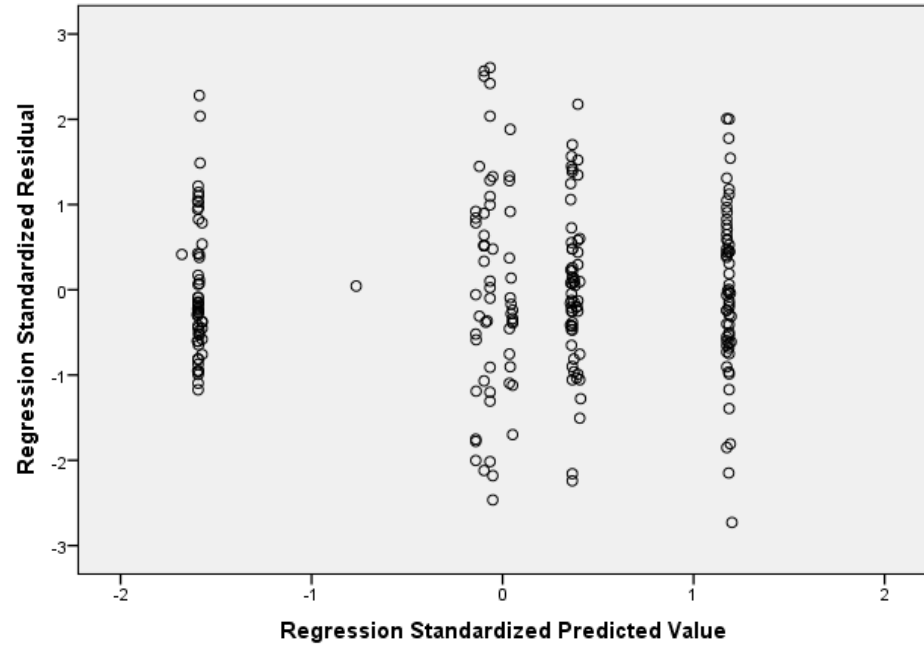

```

REGRESSION
  /DESCRIPTIVES MEAN STDDEV CORR SIG N
  /MISSING LISTWISE
  /STATISTICS COEFF OUTS CI(95) R ANOVA COLLIN TOL
  /CRITERIA=PIN(.05) POUT(.10)
  /NOORIGIN
  /DEPENDENT Fe56_ppm
  /METHOD=STEPWISE Avg_Rain_Flowering_to_harvest Min_Temp_Flowering_to_harvest
    Max_Temp_Flowering_to_harvest Avg_Temp_Flowering_to_harvest
  /SCATTERPLOT=(*ZRESID ,*ZPRED)
  /RESIDUALS HISTOGRAM(ZRESID) NORMPROB(ZRESID)
  /CASEWISE PLOT(ZRESID) OUTLIERS(3)
  /SAVE PRED COOK ZRESID.

```

## Regression

### Notes

|                        |                                |                                                                                                           |
|------------------------|--------------------------------|-----------------------------------------------------------------------------------------------------------|
| Output Created         | 23-NOV-2017 16:00:30           |                                                                                                           |
| Comments               |                                |                                                                                                           |
| Input                  | Data                           | C:\Users\Brendan\Documents\Mi<br>cronutrients\Yield and<br>micronutirents<br>variety+condition+season.sav |
|                        | Active Dataset                 | DataSet1                                                                                                  |
|                        | Filter                         | <none>                                                                                                    |
|                        | Weight                         | <none>                                                                                                    |
|                        | Split File                     | <none>                                                                                                    |
|                        | N of Rows in Working Data File | 240                                                                                                       |
| Missing Value Handling | Definition of Missing          | User-defined missing values are<br>treated as missing.                                                    |

Cases Used

Statistics are based on cases with no missing values for any variable used.

Syntax

```
REGRESSION  
  /DESCRIPTIVES MEAN  
STDDEV CORR SIG N  
  /MISSING LISTWISE  
  /STATISTICS COEFF OUTS  
CI(95) R ANOVA COLLIN TOL  
  /CRITERIA=PIN(.05)  
POUT(.10)  
  /NOORIGIN  
  /DEPENDENT Fe56_ppm  
  /METHOD=STEPWISE  
Avg_Rain_Flowering_to_harvest  
Min_Temp_Flowering_to_harvest  
  
Max_Temp_Flowering_to_harves  
t  
Avg_Temp_Flowering_to_harves  
t  
  /SCATTERPLOT=(*ZRESID  
,*ZPRED)  
  /RESIDUALS  
HISTOGRAM(ZRESID)  
NORMPROB(ZRESID)  
  /CASEWISE PLOT(ZRESID)  
OUTLIERS(3)  
  /SAVE PRED COOK ZRESID.
```

Resources

Processor Time

00:00:00.95

|                               |                                               |                                |
|-------------------------------|-----------------------------------------------|--------------------------------|
|                               | Elapsed Time                                  | 00:00:07.40                    |
|                               | Memory Required                               | 6512 bytes                     |
|                               | Additional Memory Required for Residual Plots | 632 bytes                      |
| Variables Created or Modified | PRE_3                                         | Unstandardized Predicted Value |
|                               | ZRE_3                                         | Standardized Residual          |
|                               | COO_3                                         | Cook's Distance                |

### Descriptive Statistics

|                               | Mean      | Std. Deviation | N   |
|-------------------------------|-----------|----------------|-----|
| Fe56_ppm                      | 56.524989 | 7.8494808      | 230 |
| Avg_Rain_Flowering_to_harvest | 54.0339   | 34.95716       | 230 |
| Min_Temp_Flowering_to_harvest | 10.5826   | 1.25178        | 230 |
| Max_Temp_Flowering_to_harvest | 32.4783   | 2.54787        | 230 |
| Avg_Temp_Flowering_to_harvest | 22.5811   | 1.41461        | 230 |



## Correlations

|                     |                               | Fe56_ppm | Avg_Rain_Flowering_to_harvest | Min_Temp_Flowering_to_harvest | Max_Temp_Flowering_to_harvest | Avg_Temp_Flowering_to_harvest |
|---------------------|-------------------------------|----------|-------------------------------|-------------------------------|-------------------------------|-------------------------------|
| Pearson Correlation | Fe56_ppm                      | 1.000    | -.283                         | -.414                         | -.268                         | -.562                         |
|                     | Avg_Rain_Flowering_to_harvest | -.283    | 1.000                         | -.322                         | -.680                         | -.237                         |
|                     | Min_Temp_Flowering_to_harvest | -.414    | -.322                         | 1.000                         | .722                          | .839                          |
|                     | Max_Temp_Flowering_to_harvest | -.268    | -.680                         | .722                          | 1.000                         | .771                          |
|                     | Avg_Temp_Flowering_to_harvest | -.562    | -.237                         | .839                          | .771                          | 1.000                         |
| Sig. (1-tailed)     | Fe56_ppm                      | .        | .000                          | .000                          | .000                          | .000                          |
|                     | Avg_Rain_Flowering_to_harvest | .000     | .                             | .000                          | .000                          | .000                          |
|                     | Min_Temp_Flowering_to_harvest | .000     | .000                          | .                             | .000                          | .000                          |
|                     | Max_Temp_Flowering_to_harvest | .000     | .000                          | .000                          | .                             | .000                          |
|                     | Avg_Temp_Flowering_to_harvest | .000     | .000                          | .000                          | .000                          | .                             |
| N                   | Fe56_ppm                      | 230      | 230                           | 230                           | 230                           | 230                           |
|                     | Avg_Rain_Flowering_to_harvest | 230      | 230                           | 230                           | 230                           | 230                           |
|                     | Min_Temp_Flowering_to_harvest | 230      | 230                           | 230                           | 230                           | 230                           |
|                     | Max_Temp_Flowering_to_harvest | 230      | 230                           | 230                           | 230                           | 230                           |
|                     | Avg_Temp_Flowering_to_harvest | 230      | 230                           | 230                           | 230                           | 230                           |

### Variables Entered/Removed<sup>a</sup>

| Model | Variables Entered             | Variables Removed | Method                                                                                      |
|-------|-------------------------------|-------------------|---------------------------------------------------------------------------------------------|
| 1     | Avg_Temp_Flowering_to_harvest | .                 | Stepwise (Criteria: Probability-of-F-to-enter <= .050, Probability-of-F-to-remove >= .100). |
| 2     | Avg_Rain_Flowering_to_harvest | .                 | Stepwise (Criteria: Probability-of-F-to-enter <= .050, Probability-of-F-to-remove >= .100). |
| 3     | Max_Temp_Flowering_to_harvest | .                 | Stepwise (Criteria: Probability-of-F-to-enter <= .050, Probability-of-F-to-remove >= .100). |

a. Dependent Variable: Fe56\_ppm

### Model Summary<sup>d</sup>

| Model | R                 | R Square | Adjusted R Square | Std. Error of the Estimate |
|-------|-------------------|----------|-------------------|----------------------------|
| 1     | .562 <sup>a</sup> | .316     | .313              | 6.5063473                  |
| 2     | .707 <sup>b</sup> | .500     | .495              | 5.5756086                  |
| 3     | .721 <sup>c</sup> | .520     | .514              | 5.4730791                  |

a. Predictors: (Constant), Avg\_Temp\_Flowering\_to\_harvest

b. Predictors: (Constant), Avg\_Temp\_Flowering\_to\_harvest, Avg\_Rain\_Flowering\_to\_harvest

c. Predictors: (Constant), Avg\_Temp\_Flowering\_to\_harvest, Avg\_Rain\_Flowering\_to\_harvest, Max\_Temp\_Flowering\_to\_harvest

d. Dependent Variable: Fe56\_ppm

### ANOVA<sup>a</sup>

| Model |            | Sum of Squares | df  | Mean Square | F       | Sig.              |
|-------|------------|----------------|-----|-------------|---------|-------------------|
| 1     | Regression | 4457.863       | 1   | 4457.863    | 105.306 | .000 <sup>b</sup> |
|       | Residual   | 9651.823       | 228 | 42.333      |         |                   |
|       | Total      | 14109.686      | 229 |             |         |                   |
| 2     | Regression | 7052.843       | 2   | 3526.422    | 113.436 | .000 <sup>c</sup> |
|       | Residual   | 7056.842       | 227 | 31.087      |         |                   |
|       | Total      | 14109.686      | 229 |             |         |                   |
| 3     | Regression | 7339.947       | 3   | 2446.649    | 81.679  | .000 <sup>d</sup> |
|       | Residual   | 6769.738       | 226 | 29.955      |         |                   |
|       | Total      | 14109.686      | 229 |             |         |                   |

a. Dependent Variable: Fe56\_ppm

b. Predictors: (Constant), Avg\_Temp\_Flowering\_to\_harvest

c. Predictors: (Constant), Avg\_Temp\_Flowering\_to\_harvest, Avg\_Rain\_Flowering\_to\_harvest

d. Predictors: (Constant), Avg\_Temp\_Flowering\_to\_harvest, Avg\_Rain\_Flowering\_to\_harvest, Max\_Temp\_Flowering\_to\_harvest

**Coefficients<sup>a</sup>**

| Model |                               | Unstandardized Coefficients |            | Standardized Coefficients | t       | Sig. | 95.0% Confidence Interval for B |             | Collinearity Statistics |       |
|-------|-------------------------------|-----------------------------|------------|---------------------------|---------|------|---------------------------------|-------------|-------------------------|-------|
|       |                               | B                           | Std. Error | Beta                      |         |      | Lower Bound                     | Upper Bound | Tolerance               | VIF   |
| 1     | (Constant)                    | 126.954                     | 6.877      |                           | 18.462  | .000 | 113.404                         | 140.504     |                         |       |
|       | Avg_Temp_Flowering_to_harvest | -3.119                      | .304       | -.562                     | -10.262 | .000 | -3.718                          | -2.520      | 1.000                   | 1.000 |
| 2     | (Constant)                    | 145.446                     | 6.231      |                           | 23.343  | .000 | 133.168                         | 157.723     |                         |       |
|       | Avg_Temp_Flowering_to_harvest | -3.701                      | .268       | -.667                     | -13.802 | .000 | -4.229                          | -3.172      | .944                    | 1.060 |
|       | Avg_Rain_Flowering_to_harvest | -.099                       | .011       | -.441                     | -9.136  | .000 | -.121                           | -.078       | .944                    | 1.060 |
| 3     | (Constant)                    | 155.037                     | 6.856      |                           | 22.613  | .000 | 141.527                         | 168.547     |                         |       |
|       | Avg_Temp_Flowering_to_harvest | -2.349                      | .510       | -.423                     | -4.606  | .000 | -3.353                          | -1.344      | .251                    | 3.977 |
|       | Avg_Rain_Flowering_to_harvest | -.144                       | .018       | -.640                     | -8.025  | .000 | -.179                           | -.108       | .334                    | 2.995 |
|       | Max_Temp_Flowering_to_harvest | -1.161                      | .375       | -.377                     | -3.096  | .002 | -1.900                          | -.422       | .143                    | 6.981 |

a. Dependent Variable: Fe56\_ppm

**Excluded Variables<sup>a</sup>**

| Model |                               | Beta In            | t      | Sig. | Partial Correlation | Collinearity Statistics |       |                   |
|-------|-------------------------------|--------------------|--------|------|---------------------|-------------------------|-------|-------------------|
|       |                               |                    |        |      |                     | Tolerance               | VIF   | Minimum Tolerance |
| 1     | Avg_Rain_Flowering_to_harvest | -.441 <sup>b</sup> | -9.136 | .000 | -.519               | .944                    | 1.060 | .944              |
|       | Min_Temp_Flowering_to_harvest | .194 <sup>b</sup>  | 1.939  | .054 | .128                | .297                    | 3.370 | .297              |
|       | Max_Temp_Flowering_to_harvest | .408 <sup>b</sup>  | 4.987  | .000 | .314                | .405                    | 2.470 | .405              |
| 2     | Min_Temp_Flowering_to_harvest | .011 <sup>c</sup>  | .123   | .902 | .008                | .281                    | 3.563 | .281              |
|       | Max_Temp_Flowering_to_harvest | -.377 <sup>c</sup> | -3.096 | .002 | -.202               | .143                    | 6.981 | .143              |
| 3     | Min_Temp_Flowering_to_harvest | .024 <sup>d</sup>  | .279   | .780 | .019                | .280                    | 3.572 | .143              |

a. Dependent Variable: Fe56\_ppm

b. Predictors in the Model: (Constant), Avg\_Temp\_Flowering\_to\_harvest

c. Predictors in the Model: (Constant), Avg\_Temp\_Flowering\_to\_harvest, Avg\_Rain\_Flowering\_to\_harvest

d. Predictors in the Model: (Constant), Avg\_Temp\_Flowering\_to\_harvest, Avg\_Rain\_Flowering\_to\_harvest, Max\_Temp\_Flowering\_to\_harvest

### Collinearity Diagnostics<sup>a</sup>

| Model | Dimension | Eigenvalue | Condition Index | (Constant) | Variance Proportions              |                                   |                                   |
|-------|-----------|------------|-----------------|------------|-----------------------------------|-----------------------------------|-----------------------------------|
|       |           |            |                 |            | Avg_Temp_Flowe<br>ring_to_harvest | Avg_Rain_Floweri<br>ng_to_harvest | Max_Temp_Flowe<br>ring_to_harvest |
| 1     | 1         | 1.998      | 1.000           | .00        | .00                               |                                   |                                   |
|       | 2         | .002       | 32.026          | 1.00       | 1.00                              |                                   |                                   |
| 2     | 1         | 2.781      | 1.000           | .00        | .00                               | .03                               |                                   |
|       | 2         | .217       | 3.582           | .00        | .00                               | .89                               |                                   |
|       | 3         | .002       | 39.401          | 1.00       | 1.00                              | .08                               |                                   |
| 3     | 1         | 3.743      | 1.000           | .00        | .00                               | .01                               | .00                               |
|       | 2         | .255       | 3.835           | .00        | .00                               | .30                               | .00                               |
|       | 3         | .002       | 43.074          | .93        | .11                               | .11                               | .04                               |
|       | 4         | .000       | 87.370          | .07        | .89                               | .58                               | .96                               |

a. Dependent Variable: Fe56\_ppm

### Casewise Diagnostics<sup>a</sup>

| Case Number | Std. Residual | Fe56_ppm | Predicted Value | Residual    |
|-------------|---------------|----------|-----------------|-------------|
| 32          | -5.711        | 28.6682  | 59.927411       | -31.2592485 |
| 174         | -4.898        | 34.7061  | 61.512835       | -26.8067682 |

a. Dependent Variable: Fe56\_ppm

### Residuals Statistics<sup>a</sup>

|                                   | Minimum     | Maximum    | Mean      | Std. Deviation | N   |
|-----------------------------------|-------------|------------|-----------|----------------|-----|
| Predicted Value                   | 46.046883   | 62.088154  | 56.524989 | 5.6614637      | 230 |
| Std. Predicted Value              | -1.851      | .983       | .000      | 1.000          | 230 |
| Standard Error of Predicted Value | .622        | 1.774      | .716      | .089           | 230 |
| Adjusted Predicted Value          | 46.060757   | 62.224964  | 56.529872 | 5.6626074      | 230 |
| Residual                          | -31.2592487 | 13.3050604 | .0000000  | 5.4371110      | 230 |
| Std. Residual                     | -5.711      | 2.431      | .000      | .993           | 230 |
| Stud. Residual                    | -5.749      | 2.450      | .000      | 1.002          | 230 |
| Deleted Residual                  | -31.6687260 | 13.5093918 | -.0048830 | 5.5358880      | 230 |
| Stud. Deleted Residual            | -6.208      | 2.477      | -.004     | 1.023          | 230 |
| Mahal. Distance                   | 1.958       | 23.065     | 2.987     | 1.465          | 230 |
| Cook's Distance                   | .000        | .126       | .005      | .013           | 230 |
| Centered Leverage Value           | .009        | .101       | .013      | .006           | 230 |

a. Dependent Variable: Fe56\_ppm

# Charts

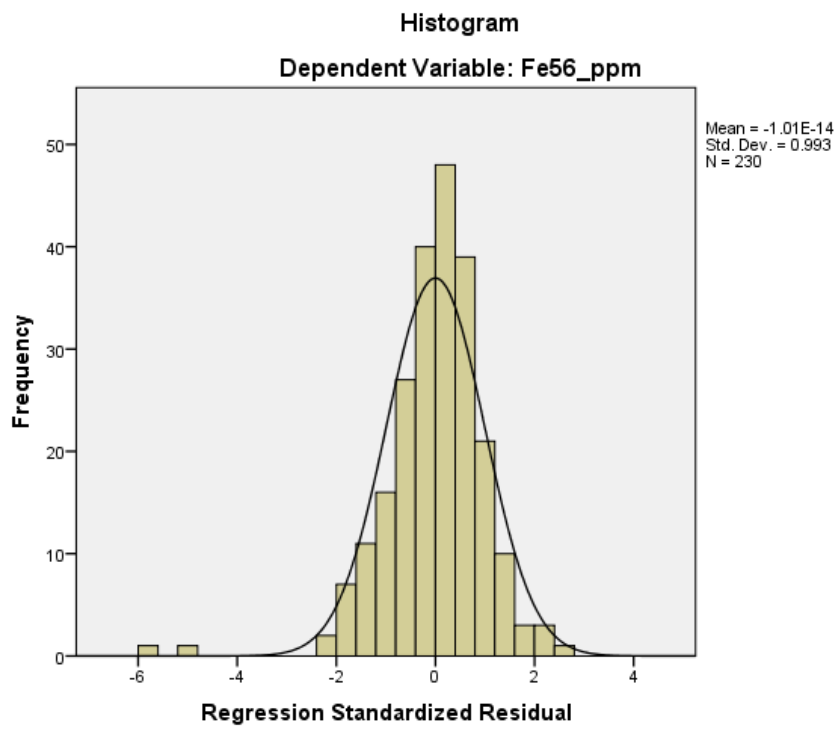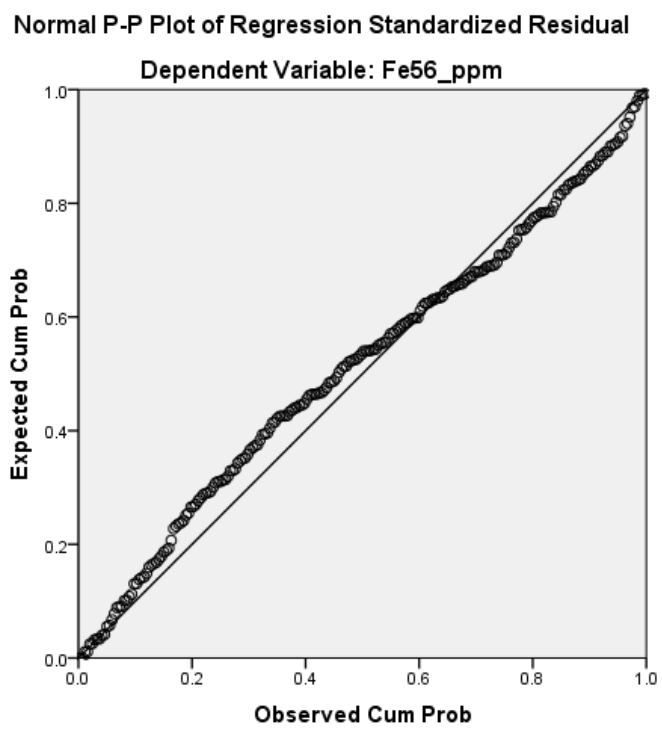

Scatterplot

Dependent Variable: Fe56\_ppm

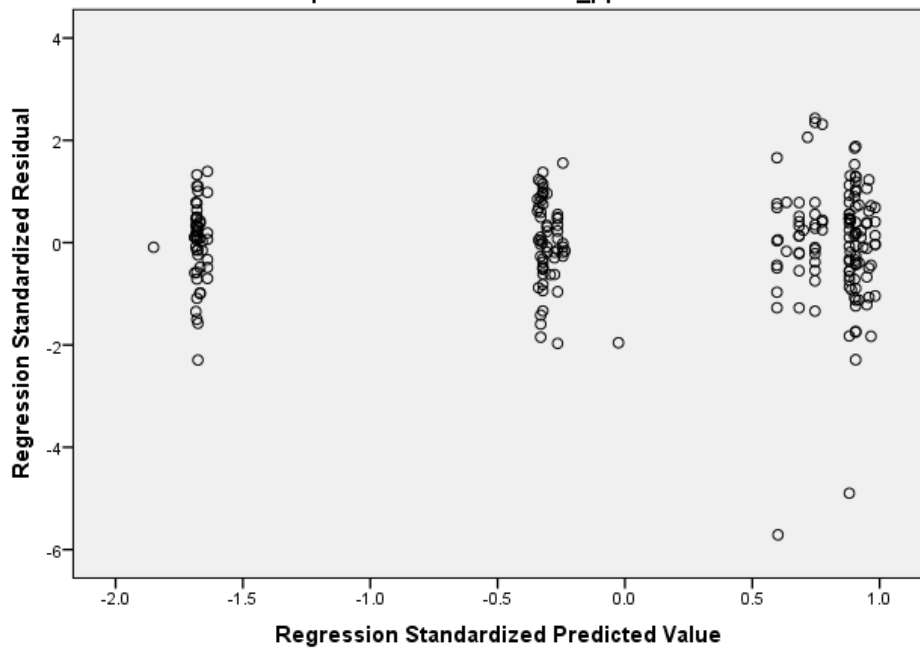

```

REGRESSION
  /DESCRIPTIVES MEAN STDDEV CORR SIG N
  /MISSING LISTWISE
  /STATISTICS COEFF OUTS CI(95) R ANOVA COLLIN TOL
  /CRITERIA=PIN(.05) POUT(.10)
  /NOORIGIN
  /DEPENDENT Zn66_ppm
  /METHOD=STEPWISE Avg_Rain_Flowering_to_harvest Min_Temp_Flowering_to_harvest
    Max_Temp_Flowering_to_harvest Avg_Temp_Flowering_to_harvest
  /SCATTERPLOT=(*ZRESID ,*ZPRED)
  /RESIDUALS HISTOGRAM(ZRESID) NORMPROB(ZRESID)
  /CASEWISE PLOT(ZRESID) OUTLIERS(3)
  /SAVE PRED COOK ZRESID.

```

## Regression

### Notes

|                        |                                |                                                                                                           |
|------------------------|--------------------------------|-----------------------------------------------------------------------------------------------------------|
| Output Created         |                                | 23-NOV-2017 17:20:10                                                                                      |
| Comments               |                                |                                                                                                           |
| Input                  | Data                           | C:\Users\Brendan\Documents\Mi<br>cronutrients\Yield and<br>micronutirents<br>variety+condition+season.sav |
|                        | Active Dataset                 | DataSet1                                                                                                  |
|                        | Filter                         | <none>                                                                                                    |
|                        | Weight                         | <none>                                                                                                    |
|                        | Split File                     | <none>                                                                                                    |
|                        | N of Rows in Working Data File | 240                                                                                                       |
| Missing Value Handling | Definition of Missing          | User-defined missing values are<br>treated as missing.                                                    |
|                        | Cases Used                     | Statistics are based on cases<br>with no missing values for any<br>variable used.                         |



|                               |                                               |                                                                                                                                                                                                                                                                                                                                                                                                                                                                                                                                              |
|-------------------------------|-----------------------------------------------|----------------------------------------------------------------------------------------------------------------------------------------------------------------------------------------------------------------------------------------------------------------------------------------------------------------------------------------------------------------------------------------------------------------------------------------------------------------------------------------------------------------------------------------------|
| Syntax                        |                                               | REGRESSION<br>/DESCRIPTIVES MEAN<br>STDDEV CORR SIG N<br>/MISSING LISTWISE<br>/STATISTICS COEFF OUTS<br>CI(95) R ANOVA COLLIN TOL<br>/CRITERIA=PIN(.05)<br>POUT(.10)<br>/NOORIGIN<br>/DEPENDENT Zn66_ppm<br>/METHOD=STEPWISE<br>Avg_Rain_Flowering_to_harvest<br>Min_Temp_Flowering_to_harvest<br><br>Max_Temp_Flowering_to_harves<br>t<br>Avg_Temp_Flowering_to_harves<br>t<br>/SCATTERPLOT=(*ZRESID<br>,*ZPRED)<br>/RESIDUALS<br>HISTOGRAM(ZRESID)<br>NORMPROB(ZRESID)<br>/CASEWISE PLOT(ZRESID)<br>OUTLIERS(3)<br>/SAVE PRED COOK ZRESID. |
| Resources                     | Processor Time                                | 00:00:00.52                                                                                                                                                                                                                                                                                                                                                                                                                                                                                                                                  |
|                               | Elapsed Time                                  | 00:00:00.85                                                                                                                                                                                                                                                                                                                                                                                                                                                                                                                                  |
|                               | Memory Required                               | 6624 bytes                                                                                                                                                                                                                                                                                                                                                                                                                                                                                                                                   |
|                               | Additional Memory Required for Residual Plots | 632 bytes                                                                                                                                                                                                                                                                                                                                                                                                                                                                                                                                    |
| Variables Created or Modified | PRE_4                                         | Unstandardized Predicted Value                                                                                                                                                                                                                                                                                                                                                                                                                                                                                                               |
|                               | ZRE_4                                         | Standardized Residual                                                                                                                                                                                                                                                                                                                                                                                                                                                                                                                        |
|                               | COO_4                                         | Cook's Distance                                                                                                                                                                                                                                                                                                                                                                                                                                                                                                                              |

### Descriptive Statistics

|                               | Mean      | Std. Deviation | N   |
|-------------------------------|-----------|----------------|-----|
| Zn66_ppm                      | 36.928831 | 8.1625681      | 227 |
| Avg_Rain_Flowering_to_harvest | 54.2446   | 34.74610       | 227 |
| Min_Temp_Flowering_to_harvest | 10.5758   | 1.25345        | 227 |
| Max_Temp_Flowering_to_harvest | 32.4674   | 2.54966        | 227 |
| Avg_Temp_Flowering_to_harvest | 22.5844   | 1.42237        | 227 |

## Correlations

|                     | Zn66_ppm                      | Avg_Rain_Flowering_to_harvest | Min_Temp_Flowering_to_harvest | Max_Temp_Flowering_to_harvest | Avg_Temp_Flowering_to_harvest |
|---------------------|-------------------------------|-------------------------------|-------------------------------|-------------------------------|-------------------------------|
| Pearson Correlation | Zn66_ppm                      | 1.000                         | -.130                         | .161                          | .201                          |
|                     | Avg_Rain_Flowering_to_harvest | -.130                         | 1.000                         | -.312                         | -.675                         |
|                     | Min_Temp_Flowering_to_harvest | .161                          | -.312                         | 1.000                         | .719                          |
|                     | Max_Temp_Flowering_to_harvest | .201                          | -.675                         | .719                          | 1.000                         |
|                     | Avg_Temp_Flowering_to_harvest | .112                          | -.235                         | .841                          | .773                          |
| Sig. (1-tailed)     | Zn66_ppm                      | .                             | .025                          | .008                          | .001                          |
|                     | Avg_Rain_Flowering_to_harvest | .025                          | .                             | .000                          | .000                          |
|                     | Min_Temp_Flowering_to_harvest | .008                          | .000                          | .                             | .000                          |
|                     | Max_Temp_Flowering_to_harvest | .001                          | .000                          | .000                          | .                             |
|                     | Avg_Temp_Flowering_to_harvest | .046                          | .000                          | .000                          | .000                          |
| N                   | Zn66_ppm                      | 227                           | 227                           | 227                           | 227                           |
|                     | Avg_Rain_Flowering_to_harvest | 227                           | 227                           | 227                           | 227                           |
|                     | Min_Temp_Flowering_to_harvest | 227                           | 227                           | 227                           | 227                           |
|                     | Max_Temp_Flowering_to_harvest | 227                           | 227                           | 227                           | 227                           |
|                     | Avg_Temp_Flowering_to_harvest | 227                           | 227                           | 227                           | 227                           |

## Variables Entered/Removed<sup>a</sup>

| Model | Variables Entered             | Variables Removed | Method                                                                                      |
|-------|-------------------------------|-------------------|---------------------------------------------------------------------------------------------|
| 1     | Max_Temp_Flowering_to_harvest | .                 | Stepwise (Criteria: Probability-of-F-to-enter <= .050, Probability-of-F-to-remove >= .100). |

a. Dependent Variable: Zn66\_ppm

## Model Summary<sup>b</sup>

| Model | R                 | R Square | Adjusted R Square | Std. Error of the Estimate |
|-------|-------------------|----------|-------------------|----------------------------|
| 1     | .201 <sup>a</sup> | .040     | .036              | 8.0138276                  |

a. Predictors: (Constant), Max\_Temp\_Flowering\_to\_harvest

b. Dependent Variable: Zn66\_ppm

## ANOVA<sup>a</sup>

| Model |            | Sum of Squares | df  | Mean Square | F     | Sig.              |
|-------|------------|----------------|-----|-------------|-------|-------------------|
| 1     | Regression | 607.996        | 1   | 607.996     | 9.467 | .002 <sup>b</sup> |
|       | Residual   | 14449.822      | 225 | 64.221      |       |                   |
|       | Total      | 15057.819      | 226 |             |       |                   |

a. Dependent Variable: Zn66\_ppm

b. Predictors: (Constant), Max\_Temp\_Flowering\_to\_harvest

### Coefficients<sup>a</sup>

| Model |                               | Unstandardized Coefficients |            | Standardized         | t     | Sig. | 95.0% Confidence Interval for B |             | Collinearity Statistics |       |
|-------|-------------------------------|-----------------------------|------------|----------------------|-------|------|---------------------------------|-------------|-------------------------|-------|
|       |                               | B                           | Std. Error | Coefficients<br>Beta |       |      | Lower Bound                     | Upper Bound | Tolerance               | VIF   |
| 1     | (Constant)                    | 16.043                      | 6.809      |                      | 2.356 | .019 | 2.625                           | 29.460      |                         |       |
|       | Max_Temp_Flowering_to_harvest | .643                        | .209       | .201                 | 3.077 | .002 | .231                            | 1.055       | 1.000                   | 1.000 |

a. Dependent Variable: Zn66\_ppm

### Excluded Variables<sup>a</sup>

| Model |                               | Beta In            | t      | Sig. | Partial Correlation | Collinearity Statistics |       |                   |
|-------|-------------------------------|--------------------|--------|------|---------------------|-------------------------|-------|-------------------|
|       |                               |                    |        |      |                     | Tolerance               | VIF   | Minimum Tolerance |
| 1     | Avg_Rain_Flowering_to_harvest | .010 <sup>b</sup>  | .114   | .909 | .008                | .544                    | 1.838 | .544              |
|       | Min_Temp_Flowering_to_harvest | .034 <sup>b</sup>  | .358   | .720 | .024                | .483                    | 2.069 | .483              |
|       | Avg_Temp_Flowering_to_harvest | -.107 <sup>b</sup> | -1.042 | .299 | -.069               | .402                    | 2.488 | .402              |

a. Dependent Variable: Zn66\_ppm

b. Predictors in the Model: (Constant), Max\_Temp\_Flowering\_to\_harvest

### Collinearity Diagnostics<sup>a</sup>

| Model | Dimension | Eigenvalue | Condition Index | Variance Proportions |                               |
|-------|-----------|------------|-----------------|----------------------|-------------------------------|
|       |           |            |                 | (Constant)           | Max_Temp_Flowering_to_harvest |
| 1     | 1         | 1.997      | 1.000           | .00                  | .00                           |
|       | 2         | .003       | 25.563          | 1.00                 | 1.00                          |

a. Dependent Variable: Zn66\_ppm

### Casewise Diagnostics<sup>a</sup>

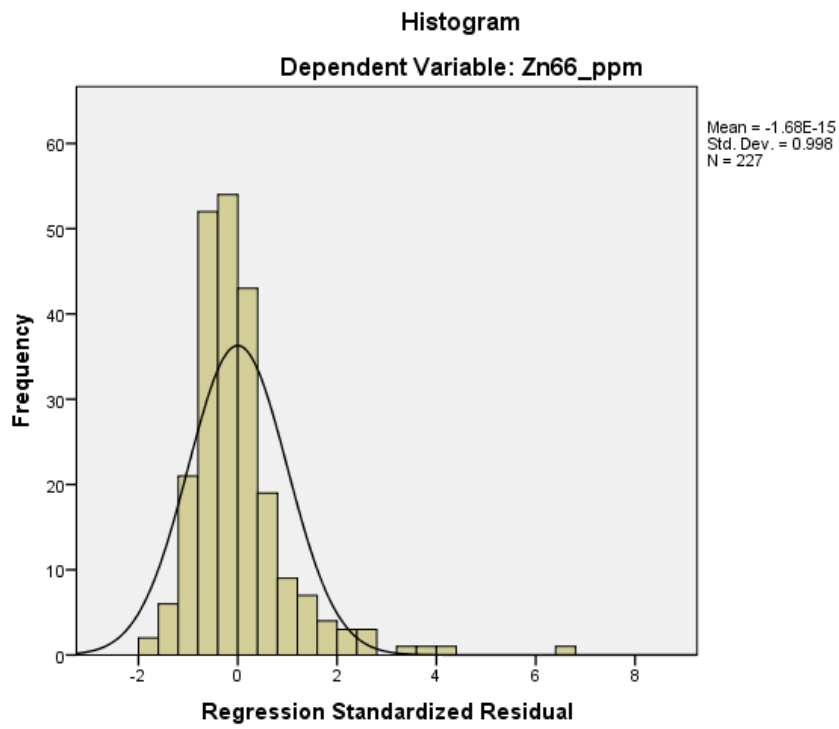

| Case Number | Std. Residual | Zn66_ppm | Predicted Value | Residual   |
|-------------|---------------|----------|-----------------|------------|
| 55          | 3.654         | 67.7776  | 38.493721       | 29.2838425 |
| 107         | 6.703         | 92.5357  | 38.815371       | 53.7203380 |
| 135         | 3.478         | 63.2790  | 35.405883       | 27.8731201 |
| 159         | 4.149         | 68.6578  | 35.405883       | 33.2518950 |

a. Dependent Variable: Zn66\_ppm

### Residuals Statistics<sup>a</sup>

|                                   | Minimum     | Maximum    | Mean      | Std. Deviation | N   |
|-----------------------------------|-------------|------------|-----------|----------------|-----|
| Predicted Value                   | 35.341553   | 38.815372  | 36.928831 | 1.6401981      | 227 |
| Std. Predicted Value              | -.968       | 1.150      | .000      | 1.000          | 227 |
| Standard Error of Predicted Value | .727        | .812       | .752      | .032           | 227 |
| Adjusted Predicted Value          | 35.130287   | 38.954529  | 36.929096 | 1.6419774      | 227 |
| Residual                          | -13.4254541 | 53.7203369 | .0000000  | 7.9960783      | 227 |
| Std. Residual                     | -1.675      | 6.703      | .000      | .998           | 227 |
| Stud. Residual                    | -1.684      | 6.738      | .000      | 1.002          | 227 |
| Deleted Residual                  | -13.5646133 | 54.2771683 | -.0002648 | 8.0678433      | 227 |
| Stud. Deleted Residual            | -1.691      | 7.525      | .006      | 1.035          | 227 |
| Mahal. Distance                   | .862        | 1.323      | .996      | .176           | 227 |
| Cook's Distance                   | .000        | .235       | .004      | .017           | 227 |
| Centered Leverage Value           | .004        | .006       | .004      | .001           | 227 |

a. Dependent Variable: Zn66\_ppm

### Charts

Normal P-P Plot of Regression Standardized Residual

Dependent Variable: Zn66\_ppm

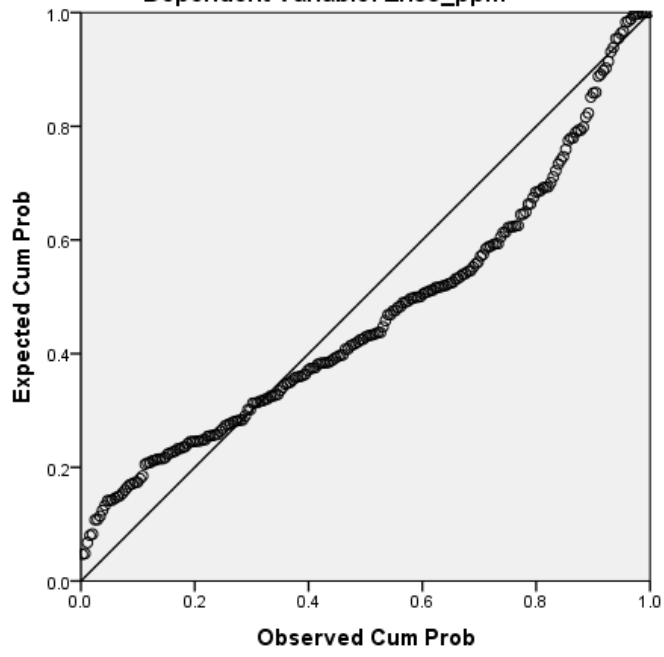

Scatterplot

Dependent Variable: Zn66\_ppm

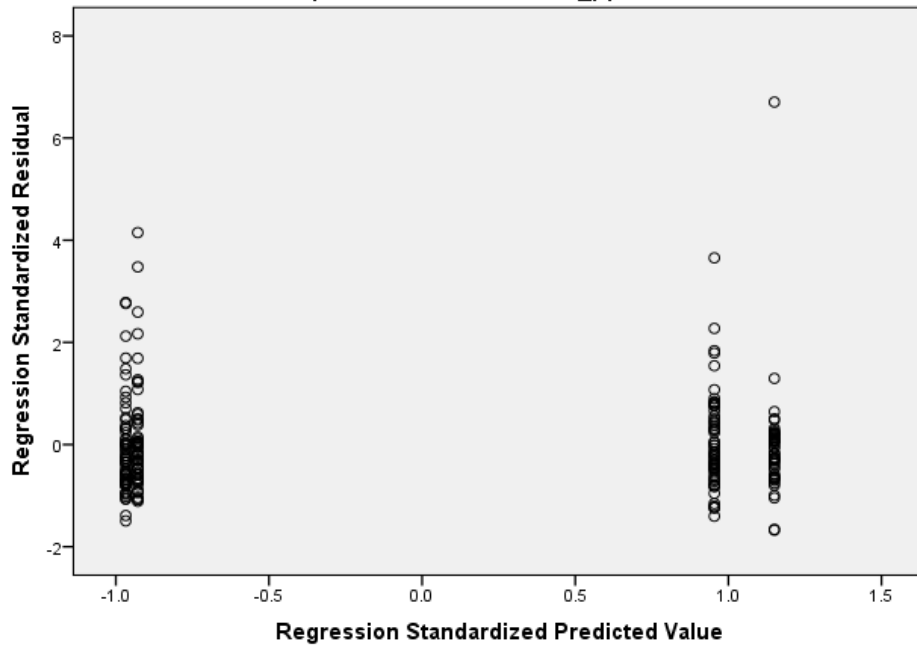

```

REGRESSION
  /DESCRIPTIVES MEAN STDDEV CORR SIG N
  /MISSING LISTWISE
  /STATISTICS COEFF OUTS CI(95) R ANOVA COLLIN TOL
  /CRITERIA=PIN(.05) POUT(.10)
  /NOORIGIN
  /DEPENDENT LG10_Pb208
  /METHOD=STEPWISE Avg_Rain_Flowering_to_harvest Min_Temp_Flowering_to_harvest
    Max_Temp_Flowering_to_harvest Avg_Temp_Flowering_to_harvest
  /SCATTERPLOT=(*ZRESID ,*ZPRED)
  /RESIDUALS HISTOGRAM(ZRESID) NORMPROB(ZRESID)
  /CASEWISE PLOT(ZRESID) OUTLIERS(3)
  /SAVE PRED COOK ZRESID.

```

## Regression

### Notes

|                        |                                |                                                                                                           |
|------------------------|--------------------------------|-----------------------------------------------------------------------------------------------------------|
| Output Created         |                                | 23-NOV-2017 17:28:22                                                                                      |
| Comments               |                                |                                                                                                           |
| Input                  | Data                           | C:\Users\Brendan\Documents\Mi<br>cronutrients\Yield and<br>micronutirents<br>variety+condition+season.sav |
|                        | Active Dataset                 | DataSet1                                                                                                  |
|                        | Filter                         | <none>                                                                                                    |
|                        | Weight                         | <none>                                                                                                    |
|                        | Split File                     | <none>                                                                                                    |
|                        | N of Rows in Working Data File | 240                                                                                                       |
| Missing Value Handling | Definition of Missing          | User-defined missing values are<br>treated as missing.                                                    |
|                        | Cases Used                     | Statistics are based on cases<br>with no missing values for any<br>variable used.                         |

|                               |                                               |                                                                                                                                                                                                                                                                                                                                                                                                                                                                                                                                                |
|-------------------------------|-----------------------------------------------|------------------------------------------------------------------------------------------------------------------------------------------------------------------------------------------------------------------------------------------------------------------------------------------------------------------------------------------------------------------------------------------------------------------------------------------------------------------------------------------------------------------------------------------------|
| Syntax                        |                                               | REGRESSION<br>/DESCRIPTIVES MEAN<br>STDDEV CORR SIG N<br>/MISSING LISTWISE<br>/STATISTICS COEFF OUTS<br>CI(95) R ANOVA COLLIN TOL<br>/CRITERIA=PIN(.05)<br>POUT(.10)<br>/NOORIGIN<br>/DEPENDENT LG10_Pb208<br>/METHOD=STEPWISE<br>Avg_Rain_Flowering_to_harvest<br>Min_Temp_Flowering_to_harvest<br><br>Max_Temp_Flowering_to_harves<br>t<br>Avg_Temp_Flowering_to_harves<br>t<br>/SCATTERPLOT=(*ZRESID<br>,*ZPRED)<br>/RESIDUALS<br>HISTOGRAM(ZRESID)<br>NORMPROB(ZRESID)<br>/CASEWISE PLOT(ZRESID)<br>OUTLIERS(3)<br>/SAVE PRED COOK ZRESID. |
| Resources                     | Processor Time                                | 00:00:00.36                                                                                                                                                                                                                                                                                                                                                                                                                                                                                                                                    |
|                               | Elapsed Time                                  | 00:00:00.46                                                                                                                                                                                                                                                                                                                                                                                                                                                                                                                                    |
|                               | Memory Required                               | 6752 bytes                                                                                                                                                                                                                                                                                                                                                                                                                                                                                                                                     |
|                               | Additional Memory Required for Residual Plots | 632 bytes                                                                                                                                                                                                                                                                                                                                                                                                                                                                                                                                      |
| Variables Created or Modified | PRE_5                                         | Unstandardized Predicted Value                                                                                                                                                                                                                                                                                                                                                                                                                                                                                                                 |
|                               | ZRE_5                                         | Standardized Residual                                                                                                                                                                                                                                                                                                                                                                                                                                                                                                                          |
|                               | COO_5                                         | Cook's Distance                                                                                                                                                                                                                                                                                                                                                                                                                                                                                                                                |

### Descriptive Statistics

|                               | Mean    | Std. Deviation | N   |
|-------------------------------|---------|----------------|-----|
| LG10_Pb208                    | -1.2540 | .52050         | 230 |
| Avg_Rain_Flowering_to_harvest | 54.0339 | 34.95716       | 230 |
| Min_Temp_Flowering_to_harvest | 10.5826 | 1.25178        | 230 |
| Max_Temp_Flowering_to_harvest | 32.4783 | 2.54787        | 230 |
| Avg_Temp_Flowering_to_harvest | 22.5811 | 1.41461        | 230 |

## Correlations

|                     |                               | LG10_Pb208 | Avg_Rain_Flowering_to_harvest | Min_Temp_Flowering_to_harvest | Max_Temp_Flowering_to_harvest | Avg_Temp_Flowering_to_harvest |
|---------------------|-------------------------------|------------|-------------------------------|-------------------------------|-------------------------------|-------------------------------|
| Pearson Correlation | LG10_Pb208                    | 1.000      | -.227                         | .483                          | .548                          | .612                          |
|                     | Avg_Rain_Flowering_to_harvest | -.227      | 1.000                         | -.322                         | -.680                         | -.237                         |
|                     | Min_Temp_Flowering_to_harvest | .483       | -.322                         | 1.000                         | .722                          | .839                          |
|                     | Max_Temp_Flowering_to_harvest | .548       | -.680                         | .722                          | 1.000                         | .771                          |
|                     | Avg_Temp_Flowering_to_harvest | .612       | -.237                         | .839                          | .771                          | 1.000                         |
| Sig. (1-tailed)     | LG10_Pb208                    | .          | .000                          | .000                          | .000                          | .000                          |
|                     | Avg_Rain_Flowering_to_harvest | .000       | .                             | .000                          | .000                          | .000                          |
|                     | Min_Temp_Flowering_to_harvest | .000       | .000                          | .                             | .000                          | .000                          |
|                     | Max_Temp_Flowering_to_harvest | .000       | .000                          | .000                          | .                             | .000                          |
|                     | Avg_Temp_Flowering_to_harvest | .000       | .000                          | .000                          | .000                          | .                             |
| N                   | LG10_Pb208                    | 230        | 230                           | 230                           | 230                           | 230                           |
|                     | Avg_Rain_Flowering_to_harvest | 230        | 230                           | 230                           | 230                           | 230                           |
|                     | Min_Temp_Flowering_to_harvest | 230        | 230                           | 230                           | 230                           | 230                           |
|                     | Max_Temp_Flowering_to_harvest | 230        | 230                           | 230                           | 230                           | 230                           |
|                     | Avg_Temp_Flowering_to_harvest | 230        | 230                           | 230                           | 230                           | 230                           |

## Variables Entered/Removed<sup>a</sup>

| Model | Variables Entered             | Variables Removed | Method                                                                                      |
|-------|-------------------------------|-------------------|---------------------------------------------------------------------------------------------|
| 1     | Avg_Temp_Flowering_to_harvest | .                 | Stepwise (Criteria: Probability-of-F-to-enter <= .050, Probability-of-F-to-remove >= .100). |
| 2     | Max_Temp_Flowering_to_harvest | .                 | Stepwise (Criteria: Probability-of-F-to-enter <= .050, Probability-of-F-to-remove >= .100). |

a. Dependent Variable: LG10\_Pb208

## Model Summary<sup>c</sup>

| Model | R                 | R Square | Adjusted R Square | Std. Error of the Estimate |
|-------|-------------------|----------|-------------------|----------------------------|
| 1     | .612 <sup>a</sup> | .375     | .372              | .41249                     |
| 2     | .624 <sup>b</sup> | .389     | .384              | .40868                     |

a. Predictors: (Constant), Avg\_Temp\_Flowering\_to\_harvest

b. Predictors: (Constant), Avg\_Temp\_Flowering\_to\_harvest, Max\_Temp\_Flowering\_to\_harvest

c. Dependent Variable: LG10\_Pb208



**ANOVA<sup>a</sup>**

| Model |            | Sum of Squares | df  | Mean Square | F       | Sig.              |
|-------|------------|----------------|-----|-------------|---------|-------------------|
| 1     | Regression | 23.246         | 1   | 23.246      | 136.619 | .000 <sup>b</sup> |
|       | Residual   | 38.794         | 228 | .170        |         |                   |
|       | Total      | 62.040         | 229 |             |         |                   |
| 2     | Regression | 24.127         | 2   | 12.064      | 72.229  | .000 <sup>c</sup> |
|       | Residual   | 37.913         | 227 | .167        |         |                   |
|       | Total      | 62.040         | 229 |             |         |                   |

a. Dependent Variable: LG10\_Pb208

b. Predictors: (Constant), Avg\_Temp\_Flowering\_to\_harvest

c. Predictors: (Constant), Avg\_Temp\_Flowering\_to\_harvest, Max\_Temp\_Flowering\_to\_harvest

### Coefficients<sup>a</sup>

| Model |                               | Unstandardized Coefficients |            | Standardized         | t       | Sig. | 95.0% Confidence Interval for B |             | Collinearity Statistics |       |
|-------|-------------------------------|-----------------------------|------------|----------------------|---------|------|---------------------------------|-------------|-------------------------|-------|
|       |                               | B                           | Std. Error | Coefficients<br>Beta |         |      | Lower Bound                     | Upper Bound | Tolerance               | VIF   |
| 1     | (Constant)                    | -6.340                      | .436       |                      | -14.542 | .000 | -7.199                          | -5.481      |                         |       |
|       | Avg_Temp_Flowering_to_harvest | .225                        | .019       | .612                 | 11.688  | .000 | .187                            | .263        | 1.000                   | 1.000 |
| 2     | (Constant)                    | -6.382                      | .432       |                      | -14.762 | .000 | -7.234                          | -5.530      |                         |       |
|       | Avg_Temp_Flowering_to_harvest | .172                        | .030       | .468                 | 5.734   | .000 | .113                            | .231        | .405                    | 2.470 |
|       | Max_Temp_Flowering_to_harvest | .038                        | .017       | .187                 | 2.297   | .023 | .005                            | .071        | .405                    | 2.470 |

a. Dependent Variable: LG10\_Pb208

### Excluded Variables<sup>a</sup>

| Model |                               | Beta In            | t      | Sig. | Partial Correlation | Collinearity Statistics |       |                      |
|-------|-------------------------------|--------------------|--------|------|---------------------|-------------------------|-------|----------------------|
|       |                               |                    |        |      |                     | Tolerance               | VIF   | Minimum<br>Tolerance |
| 1     | Avg_Rain_Flowering_to_harvest | -.087 <sup>b</sup> | -1.613 | .108 | -.106               | .944                    | 1.060 | .944                 |
|       | Min_Temp_Flowering_to_harvest | -.104 <sup>b</sup> | -1.080 | .282 | -.071               | .297                    | 3.370 | .297                 |
|       | Max_Temp_Flowering_to_harvest | .187 <sup>b</sup>  | 2.297  | .023 | .151                | .405                    | 2.470 | .405                 |
| 2     | Avg_Rain_Flowering_to_harvest | .034 <sup>c</sup>  | .376   | .708 | .025                | .334                    | 2.995 | .143                 |
|       | Min_Temp_Flowering_to_harvest | -.158 <sup>c</sup> | -1.630 | .105 | -.108               | .283                    | 3.535 | .239                 |

a. Dependent Variable: LG10\_Pb208

b. Predictors in the Model: (Constant), Avg\_Temp\_Flowering\_to\_harvest

c. Predictors in the Model: (Constant), Avg\_Temp\_Flowering\_to\_harvest, Max\_Temp\_Flowering\_to\_harvest

### Collinearity Diagnostics<sup>a</sup>

| Model | Dimension | Eigenvalue | Condition Index | (Constant) | Variance Proportions              |                                   |
|-------|-----------|------------|-----------------|------------|-----------------------------------|-----------------------------------|
|       |           |            |                 |            | Avg_Temp_Flowe<br>ring_to_harvest | Max_Temp_Flowe<br>ring_to_harvest |
| 1     | 1         | 1.998      | 1.000           | .00        | .00                               |                                   |
|       | 2         | .002       | 32.026          | 1.00       | 1.00                              |                                   |
| 2     | 1         | 2.996      | 1.000           | .00        | .00                               | .00                               |
|       | 2         | .003       | 30.922          | .74        | .01                               | .29                               |
|       | 3         | .001       | 54.132          | .26        | .99                               | .71                               |

a. Dependent Variable: LG10\_Pb208

### Casewise Diagnostics<sup>a</sup>

| Case Number | Std. Residual | LG10_Pb208 | Predicted Value | Residual |
|-------------|---------------|------------|-----------------|----------|
| 15          | 3.823         | .02        | -1.5430         | 1.56256  |

a. Dependent Variable: LG10\_Pb208

### Residuals Statistics<sup>a</sup>

|                                   | Minimum | Maximum | Mean    | Std. Deviation | N   |
|-----------------------------------|---------|---------|---------|----------------|-----|
| Predicted Value                   | -1.5551 | -.6228  | -1.2540 | .32459         | 230 |
| Std. Predicted Value              | -.928   | 1.945   | .000    | 1.000          | 230 |
| Standard Error of Predicted Value | .037    | .089    | .046    | .010           | 230 |
| Adjusted Predicted Value          | -1.5564 | -.6258  | -1.2543 | .32459         | 230 |
| Residual                          | -.90901 | 1.56256 | .00000  | .40689         | 230 |
| Std. Residual                     | -2.224  | 3.823   | .000    | .996           | 230 |
| Stud. Residual                    | -2.237  | 3.839   | .000    | 1.003          | 230 |
| Deleted Residual                  | -.91926 | 1.57555 | .00028  | .41322         | 230 |
| Stud. Deleted Residual            | -2.257  | 3.962   | .002    | 1.009          | 230 |
| Mahal. Distance                   | .871    | 9.870   | 1.991   | 1.344          | 230 |
| Cook's Distance                   | .000    | .045    | .005    | .008           | 230 |
| Centered Leverage Value           | .004    | .043    | .009    | .006           | 230 |

a. Dependent Variable: LG10\_Pb208

# Charts

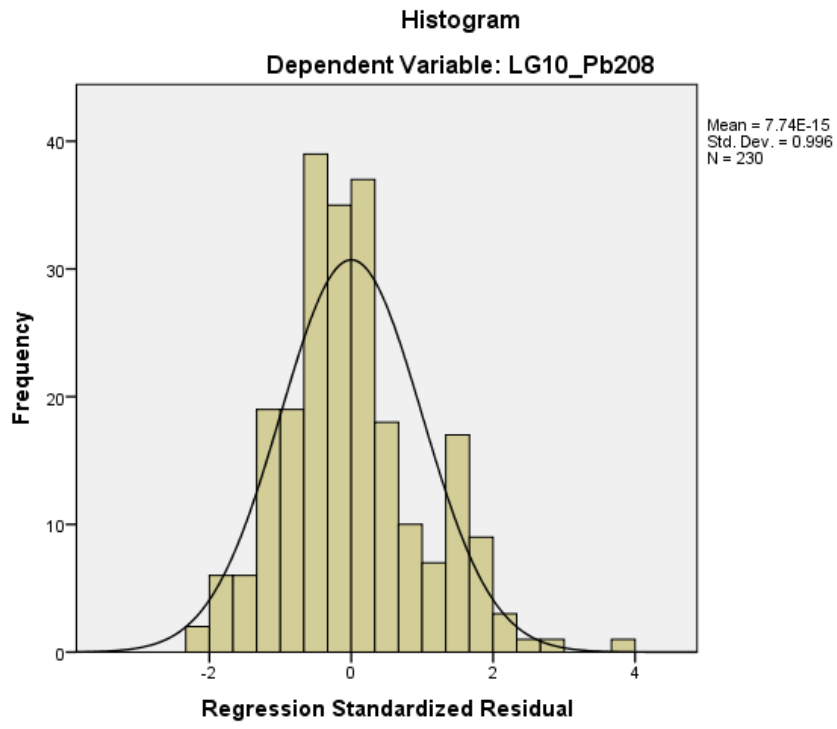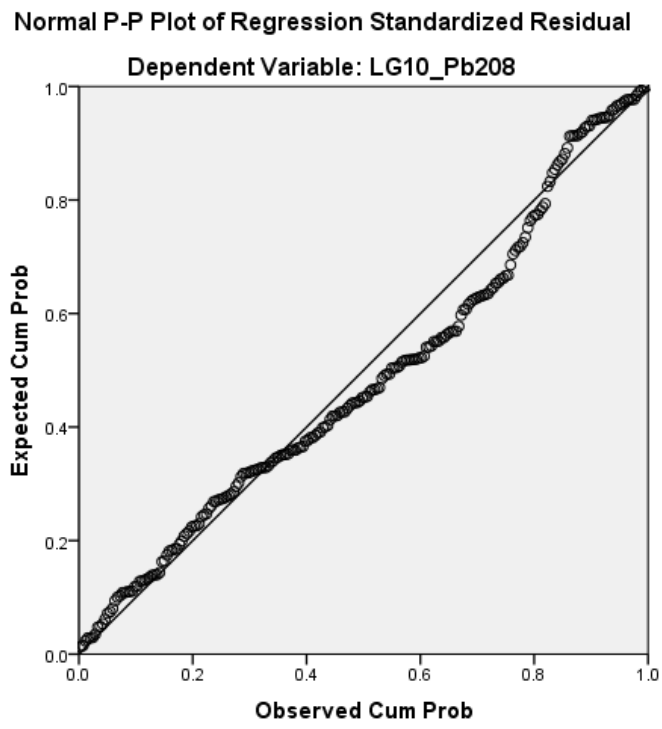

Scatterplot

Dependent Variable: LG10\_Pb208

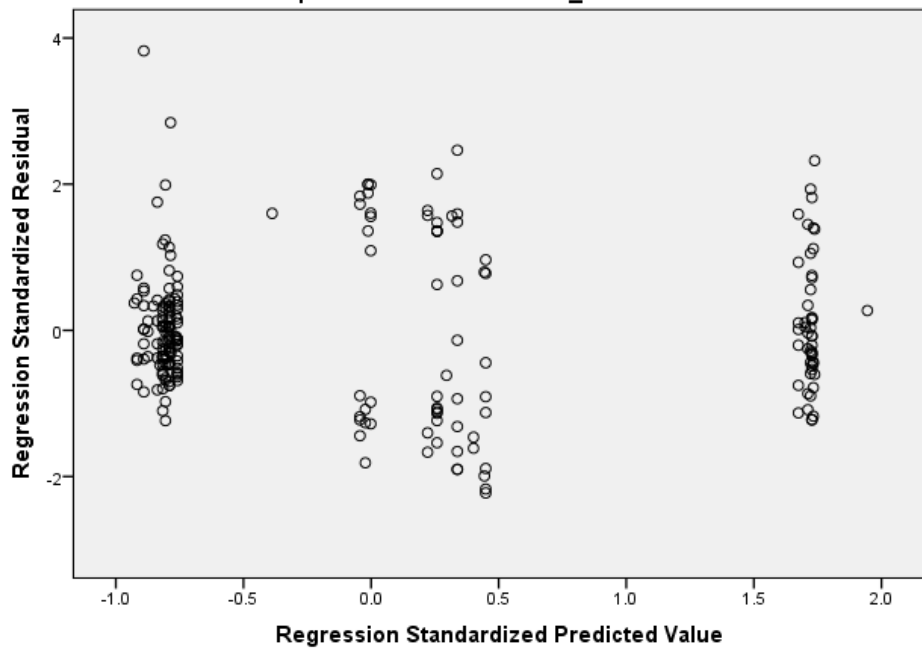

```

REGRESSION
  /DESCRIPTIVES MEAN STDDEV CORR SIG N
  /MISSING LISTWISE
  /STATISTICS COEFF OUTS CI(95) R ANOVA COLLIN TOL
  /CRITERIA=PIN(.05) POUT(.10)
  /NOORIGIN
  /DEPENDENT Phytic_acid_percent
  /METHOD=STEPWISE Avg_Rain_Flowering_to_harvest Min_Temp_Flowering_to_harvest
    Max_Temp_Flowering_to_harvest Avg_Temp_Flowering_to_harvest
  /SCATTERPLOT=(*ZRESID ,*ZPRED)
  /RESIDUALS HISTOGRAM(ZRESID) NORMPROB(ZRESID)
  /CASEWISE PLOT(ZRESID) OUTLIERS(3)
  /SAVE PRED COOK ZRESID.

```

## Regression

### Notes

|                        |                                |                                                                                                           |
|------------------------|--------------------------------|-----------------------------------------------------------------------------------------------------------|
| Output Created         |                                | 23-NOV-2017 17:45:15                                                                                      |
| Comments               |                                |                                                                                                           |
| Input                  | Data                           | C:\Users\Brendan\Documents\Mi<br>cronutrients\Yield and<br>micronutirents<br>variety+condition+season.sav |
|                        | Active Dataset                 | DataSet1                                                                                                  |
|                        | Filter                         | <none>                                                                                                    |
|                        | Weight                         | <none>                                                                                                    |
|                        | Split File                     | <none>                                                                                                    |
|                        | N of Rows in Working Data File | 240                                                                                                       |
| Missing Value Handling | Definition of Missing          | User-defined missing values are<br>treated as missing.                                                    |
|                        | Cases Used                     | Statistics are based on cases<br>with no missing values for any<br>variable used.                         |

|                               |                                               |                                                                                                                                                                                                                                                                                                                                                                                                                                                                                                                                                            |
|-------------------------------|-----------------------------------------------|------------------------------------------------------------------------------------------------------------------------------------------------------------------------------------------------------------------------------------------------------------------------------------------------------------------------------------------------------------------------------------------------------------------------------------------------------------------------------------------------------------------------------------------------------------|
| Syntax                        |                                               | REGRESSION<br>/DESCRIPTIVES MEAN<br>STDDEV CORR SIG N<br>/MISSING LISTWISE<br>/STATISTICS COEFF OUTS<br>CI(95) R ANOVA COLLIN TOL<br>/CRITERIA=PIN(.05)<br>POUT(.10)<br>/NOORIGIN<br>/DEPENDENT<br>Phytic_acid_percent<br>/METHOD=STEPWISE<br>Avg_Rain_Flowering_to_harvest<br>Min_Temp_Flowering_to_harvest<br><br>Max_Temp_Flowering_to_harves<br>t<br>Avg_Temp_Flowering_to_harves<br>t<br>/SCATTERPLOT=(*ZRESID<br>,*ZPRED)<br>/RESIDUALS<br>HISTOGRAM(ZRESID)<br>NORMPROB(ZRESID)<br>/CASEWISE PLOT(ZRESID)<br>OUTLIERS(3)<br>/SAVE PRED COOK ZRESID. |
| Resources                     | Processor Time                                | 00:00:00.61                                                                                                                                                                                                                                                                                                                                                                                                                                                                                                                                                |
|                               | Elapsed Time                                  | 00:00:00.59                                                                                                                                                                                                                                                                                                                                                                                                                                                                                                                                                |
|                               | Memory Required                               | 6864 bytes                                                                                                                                                                                                                                                                                                                                                                                                                                                                                                                                                 |
|                               | Additional Memory Required for Residual Plots | 632 bytes                                                                                                                                                                                                                                                                                                                                                                                                                                                                                                                                                  |
| Variables Created or Modified | PRE_6                                         | Unstandardized Predicted Value                                                                                                                                                                                                                                                                                                                                                                                                                                                                                                                             |
|                               | ZRE_6                                         | Standardized Residual                                                                                                                                                                                                                                                                                                                                                                                                                                                                                                                                      |
|                               | COO_6                                         | Cook's Distance                                                                                                                                                                                                                                                                                                                                                                                                                                                                                                                                            |

### Descriptive Statistics

|                               | Mean    | Std. Deviation | N   |
|-------------------------------|---------|----------------|-----|
| Phytic_acid_percent           | 1.0544  | .31563         | 229 |
| Avg_Rain_Flowering_to_harvest | 54.0352 | 35.03373       | 229 |
| Min_Temp_Flowering_to_harvest | 10.5860 | 1.25344        | 229 |
| Max_Temp_Flowering_to_harvest | 32.4891 | 2.54815        | 229 |
| Avg_Temp_Flowering_to_harvest | 22.5849 | 1.41650        | 229 |

## Correlations

|                     |                               | Phytic_acid_percent | Avg_Rain_Flowering_to_harvest | Min_Temp_Flowering_to_harvest | Max_Temp_Flowering_to_harvest | Avg_Temp_Flowering_to_harvest |
|---------------------|-------------------------------|---------------------|-------------------------------|-------------------------------|-------------------------------|-------------------------------|
| Pearson Correlation | Phytic_acid_percent           | 1.000               | -.171                         | .300                          | .328                          | .407                          |
|                     | Avg_Rain_Flowering_to_harvest | -.171               | 1.000                         | -.323                         | -.681                         | -.238                         |
|                     | Min_Temp_Flowering_to_harvest | .300                | -.323                         | 1.000                         | .721                          | .838                          |
|                     | Max_Temp_Flowering_to_harvest | .328                | -.681                         | .721                          | 1.000                         | .771                          |
|                     | Avg_Temp_Flowering_to_harvest | .407                | -.238                         | .838                          | .771                          | 1.000                         |
| Sig. (1-tailed)     | Phytic_acid_percent           | .                   | .005                          | .000                          | .000                          | .000                          |
|                     | Avg_Rain_Flowering_to_harvest | .005                | .                             | .000                          | .000                          | .000                          |
|                     | Min_Temp_Flowering_to_harvest | .000                | .000                          | .                             | .000                          | .000                          |
|                     | Max_Temp_Flowering_to_harvest | .000                | .000                          | .000                          | .                             | .000                          |
|                     | Avg_Temp_Flowering_to_harvest | .000                | .000                          | .000                          | .000                          | .                             |
| N                   | Phytic_acid_percent           | 229                 | 229                           | 229                           | 229                           | 229                           |
|                     | Avg_Rain_Flowering_to_harvest | 229                 | 229                           | 229                           | 229                           | 229                           |
|                     | Min_Temp_Flowering_to_harvest | 229                 | 229                           | 229                           | 229                           | 229                           |
|                     | Max_Temp_Flowering_to_harvest | 229                 | 229                           | 229                           | 229                           | 229                           |
|                     | Avg_Temp_Flowering_to_harvest | 229                 | 229                           | 229                           | 229                           | 229                           |

## Variables Entered/Removed<sup>a</sup>

| Model | Variables Entered             | Variables Removed | Method                                                                                      |
|-------|-------------------------------|-------------------|---------------------------------------------------------------------------------------------|
| 1     | Avg_Temp_Flowering_to_harvest | .                 | Stepwise (Criteria: Probability-of-F-to-enter <= .050, Probability-of-F-to-remove >= .100). |

a. Dependent Variable: Phytic\_acid\_percent

## Model Summary<sup>b</sup>

| Model | R                 | R Square | Adjusted R Square | Std. Error of the Estimate |
|-------|-------------------|----------|-------------------|----------------------------|
| 1     | .407 <sup>a</sup> | .166     | .162              | .28894                     |

a. Predictors: (Constant), Avg\_Temp\_Flowering\_to\_harvest

b. Dependent Variable: Phytic\_acid\_percent

## ANOVA<sup>a</sup>

| Model |            | Sum of Squares | df  | Mean Square | F      | Sig.              |
|-------|------------|----------------|-----|-------------|--------|-------------------|
| 1     | Regression | 3.762          | 1   | 3.762       | 45.057 | .000 <sup>b</sup> |
|       | Residual   | 18.952         | 227 | .083        |        |                   |
|       | Total      | 22.713         | 228 |             |        |                   |

a. Dependent Variable: Phytic\_acid\_percent

b. Predictors: (Constant), Avg\_Temp\_Flowering\_to\_harvest



### Coefficients<sup>a</sup>

| Model |                               | Unstandardized Coefficients |            | Standardized         | t      | Sig. | 95.0% Confidence Interval for B |             | Collinearity Statistics |       |
|-------|-------------------------------|-----------------------------|------------|----------------------|--------|------|---------------------------------|-------------|-------------------------|-------|
|       |                               | B                           | Std. Error | Coefficients<br>Beta |        |      | Lower Bound                     | Upper Bound | Tolerance               | VIF   |
| 1     | (Constant)                    | -.994                       | .306       |                      | -3.250 | .001 | -1.596                          | -.391       |                         |       |
|       | Avg_Temp_Flowering_to_harvest | .091                        | .014       | .407                 | 6.712  | .000 | .064                            | .117        | 1.000                   | 1.000 |

a. Dependent Variable: Phytic\_acid\_percent

### Excluded Variables<sup>a</sup>

| Model |                               | Beta In            | t      | Sig. | Partial Correlation | Tolerance | Collinearity Statistics |                   |
|-------|-------------------------------|--------------------|--------|------|---------------------|-----------|-------------------------|-------------------|
|       |                               |                    |        |      |                     |           | VIF                     | Minimum Tolerance |
| 1     | Avg_Rain_Flowering_to_harvest | -.079 <sup>b</sup> | -1.266 | .207 | -.084               | .944      | 1.060                   | .944              |
|       | Min_Temp_Flowering_to_harvest | -.139 <sup>b</sup> | -1.251 | .212 | -.083               | .297      | 3.364                   | .297              |
|       | Max_Temp_Flowering_to_harvest | .034 <sup>b</sup>  | .361   | .718 | .024                | .405      | 2.466                   | .405              |

a. Dependent Variable: Phytic\_acid\_percent

b. Predictors in the Model: (Constant), Avg\_Temp\_Flowering\_to\_harvest

### Collinearity Diagnostics<sup>a</sup>

| Model | Dimension | Eigenvalue | Condition Index | Variance Proportions |                               |
|-------|-----------|------------|-----------------|----------------------|-------------------------------|
|       |           |            |                 | (Constant)           | Avg_Temp_Flowering_to_harvest |
| 1     | 1         | 1.998      | 1.000           | .00                  | .00                           |
|       | 2         | .002       | 31.989          | 1.00                 | 1.00                          |

a. Dependent Variable: Phytic\_acid\_percent

### Casewise Diagnostics<sup>a</sup>

| Case Number | Std. Residual | Phytic_acid_percent | Predicted Value | Residual |
|-------------|---------------|---------------------|-----------------|----------|
| 48          | 3.220         | 1.86                | .9288           | .93041   |
| 145         | -3.026        | .09                 | .9642           | -.87421  |

a. Dependent Variable: Phytic\_acid\_percent

### Residuals Statistics<sup>a</sup>

|                                   | Minimum | Maximum | Mean   | Std. Deviation | N   |
|-----------------------------------|---------|---------|--------|----------------|-----|
| Predicted Value                   | .9288   | 1.3278  | 1.0544 | .12845         | 229 |
| Std. Predicted Value              | -.978   | 2.129   | .000   | 1.000          | 229 |
| Standard Error of Predicted Value | .019    | .045    | .026   | .008           | 229 |
| Adjusted Predicted Value          | .9208   | 1.3285  | 1.0544 | .12840         | 229 |
| Residual                          | -.87421 | .93041  | .00000 | .28831         | 229 |
| Std. Residual                     | -3.026  | 3.220   | .000   | .998           | 229 |
| Stud. Residual                    | -3.035  | 3.234   | .000   | 1.002          | 229 |
| Deleted Residual                  | -.87996 | .93844  | .00005 | .29071         | 229 |
| Stud. Deleted Residual            | -3.092  | 3.304   | -.001  | 1.009          | 229 |
| Mahal. Distance                   | .000    | 4.531   | .996   | 1.254          | 229 |
| Cook's Distance                   | .000    | .053    | .004   | .008           | 229 |
| Centered Leverage Value           | .000    | .020    | .004   | .005           | 229 |

a. Dependent Variable: Phytic\_acid\_percent

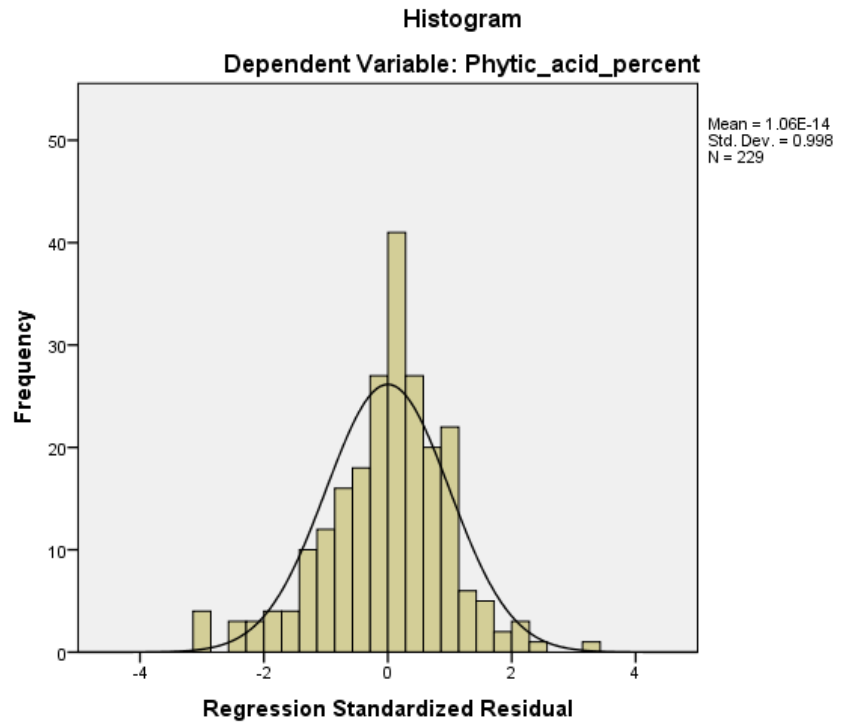

Charts

Normal P-P Plot of Regression Standardized Residual

Dependent Variable: Phytic\_acid\_percent

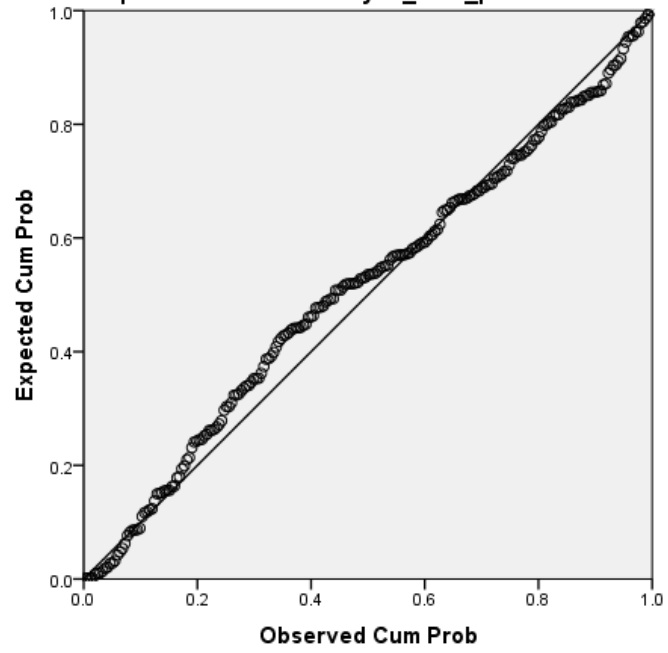

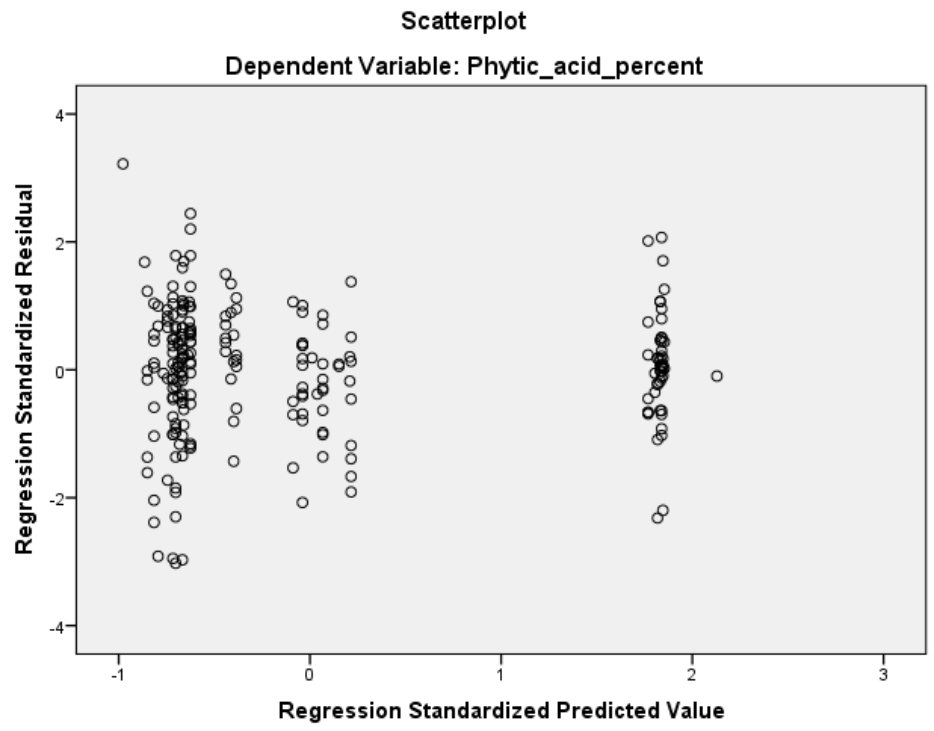

```

REGRESSION
/DESCRIPTIVES MEAN STDDEV CORR SIG N
/MISSING LISTWISE
/STATISTICS COEFF OUTS CI(95) R ANOVA
/CRITERIA=PIN(.05) POUT(.10)
/NOORIGIN

```

```

/DEPENDENT Total_protein_mg_per_g_dw
/METHOD=STEPWISE Avg_Rain_Flowering_to_harvest Min_Temp_Flowering_to_harvest
  Max_Temp_Flowering_to_harvest Avg_Temp_Flowering_to_harvest
/SCATTERPLOT=(*ZRESID ,*ZPRED)
/RESIDUALS HISTOGRAM(ZRESID) NORMPROB(ZRESID) .

```

## Regression

### Notes

|                        |                                |                                                                                                           |
|------------------------|--------------------------------|-----------------------------------------------------------------------------------------------------------|
| Output Created         |                                | 05-JUN-2018 12:08:33                                                                                      |
| Comments               |                                |                                                                                                           |
| Input                  | Data                           | C:\Users\Brendan\Documents\Mi<br>cronutrients\Yield and<br>micronutirents<br>variety+condition+season.sav |
|                        | Active Dataset                 | DataSet1                                                                                                  |
|                        | Filter                         | <none>                                                                                                    |
|                        | Weight                         | <none>                                                                                                    |
|                        | Split File                     | <none>                                                                                                    |
|                        | N of Rows in Working Data File | 240                                                                                                       |
| Missing Value Handling | Definition of Missing          | User-defined missing values are<br>treated as missing.                                                    |

|            |                                                                                                                                                                                                                                                                                                                                                                                                                                              |
|------------|----------------------------------------------------------------------------------------------------------------------------------------------------------------------------------------------------------------------------------------------------------------------------------------------------------------------------------------------------------------------------------------------------------------------------------------------|
| Cases Used | Statistics are based on cases with no missing values for any variable used.                                                                                                                                                                                                                                                                                                                                                                  |
| Syntax     | <pre> REGRESSION   /DESCRIPTIVES MEAN STDDEV CORR SIG N   /MISSING LISTWISE   /STATISTICS COEFF OUTS CI(95) R ANOVA   /CRITERIA=PIN(.05) POUT(.10)   /NOORIGIN   /DEPENDENT Total_protein_mg_per_g_dw   /METHOD=STEPWISE Avg_Rain_Flowering_to_harvest Min_Temp_Flowering_to_harvest  Max_Temp_Flowering_to_harves t Avg_Temp_Flowering_to_harves t   /SCATTERPLOT=(*ZRESID ,*ZPRED)   /RESIDUALS HISTOGRAM(ZRESID) NORMPROB(ZRESID). </pre> |

|           |                                               |             |
|-----------|-----------------------------------------------|-------------|
| Resources | Processor Time                                | 00:00:00.69 |
|           | Elapsed Time                                  | 00:00:00.44 |
|           | Memory Required                               | 7792 bytes  |
|           | Additional Memory Required for Residual Plots | 632 bytes   |

### Descriptive Statistics

|                               | Mean     | Std. Deviation | N   |
|-------------------------------|----------|----------------|-----|
| Total_protein_mg_per_g_dw     | 347.2791 | 76.44644       | 230 |
| Avg_Rain_Flowering_to_harvest | 54.0339  | 34.95716       | 230 |
| Min_Temp_Flowering_to_harvest | 10.5826  | 1.25178        | 230 |
| Max_Temp_Flowering_to_harvest | 32.4783  | 2.54787        | 230 |
| Avg_Temp_Flowering_to_harvest | 22.5812  | 1.41477        | 230 |

### Correlations

|                     |                               | Total_protein_mg_per_g_dw | Avg_Rain_Flowering_to_harvest | Min_Temp_Flowering_to_harvest | Max_Temp_Flowering_to_harvest | Avg_Temp_Flowering_to_harvest |
|---------------------|-------------------------------|---------------------------|-------------------------------|-------------------------------|-------------------------------|-------------------------------|
| Pearson Correlation | Total_protein_mg_per_g_dw     | 1.000                     | -.173                         | .036                          | .280                          | -.018                         |
|                     | Avg_Rain_Flowering_to_harvest | -.173                     | 1.000                         | -.322                         | -.680                         | -.237                         |
|                     | Min_Temp_Flowering_to_harvest | .036                      | -.322                         | 1.000                         | .722                          | .839                          |



|                 |                               |       |       |      |       |       |
|-----------------|-------------------------------|-------|-------|------|-------|-------|
|                 | Max_Temp_Flowering_to_harvest | .280  | -.680 | .722 | 1.000 | .771  |
|                 | Avg_Temp_Flowering_to_harvest | -.018 | -.237 | .839 | .771  | 1.000 |
| Sig. (1-tailed) | Total_protein_mg_per_g_dw     | .     | .004  | .294 | .000  | .395  |
|                 | Avg_Rain_Flowering_to_harvest | .004  | .     | .000 | .000  | .000  |
|                 | Min_Temp_Flowering_to_harvest | .294  | .000  | .    | .000  | .000  |
|                 | Max_Temp_Flowering_to_harvest | .000  | .000  | .000 | .     | .000  |
|                 | Avg_Temp_Flowering_to_harvest | .395  | .000  | .000 | .000  | .     |
| N               | Total_protein_mg_per_g_dw     | 230   | 230   | 230  | 230   | 230   |
|                 | Avg_Rain_Flowering_to_harvest | 230   | 230   | 230  | 230   | 230   |
|                 | Min_Temp_Flowering_to_harvest | 230   | 230   | 230  | 230   | 230   |
|                 | Max_Temp_Flowering_to_harvest | 230   | 230   | 230  | 230   | 230   |
|                 | Avg_Temp_Flowering_to_harvest | 230   | 230   | 230  | 230   | 230   |

### Variables Entered/Removed<sup>a</sup>

| Model | Variables Entered | Variables Removed | Method |
|-------|-------------------|-------------------|--------|
|-------|-------------------|-------------------|--------|

|   |                                   |   |                                                                                                           |
|---|-----------------------------------|---|-----------------------------------------------------------------------------------------------------------|
| 1 | Max_Temp_Flowe<br>ring_to_harvest | . | Stepwise (Criteria:<br>Probability-of-F-to-<br>enter <= .050,<br>Probability-of-F-to-<br>remove >= .100). |
| 2 | Avg_Temp_Flowe<br>ring_to_harvest | . | Stepwise (Criteria:<br>Probability-of-F-to-<br>enter <= .050,<br>Probability-of-F-to-<br>remove >= .100). |
| 3 | Avg_Rain_Floweri<br>ng_to_harvest | . | Stepwise (Criteria:<br>Probability-of-F-to-<br>enter <= .050,<br>Probability-of-F-to-<br>remove >= .100). |

a. Dependent Variable: Total\_protein\_mg\_per\_g\_dw

#### Model Summary<sup>d</sup>

| Model | R                 | R Square | Adjusted R<br>Square | Std. Error of the<br>Estimate |
|-------|-------------------|----------|----------------------|-------------------------------|
| 1     | .280 <sup>a</sup> | .078     | .074                 | 73.55268                      |
| 2     | .462 <sup>b</sup> | .213     | .206                 | 68.11086                      |
| 3     | .560 <sup>c</sup> | .314     | .305                 | 63.74760                      |

a. Predictors: (Constant), Max\_Temp\_Flowering\_to\_harvest

b. Predictors: (Constant), Max\_Temp\_Flowering\_to\_harvest,  
Avg\_Temp\_Flowering\_to\_harvest

- c. Predictors: (Constant), Max\_Temp\_Flowering\_to\_harvest, Avg\_Temp\_Flowering\_to\_harvest, Avg\_Rain\_Flowering\_to\_harvest
- d. Dependent Variable: Total\_protein\_mg\_per\_g\_dw

**ANOVA<sup>a</sup>**

| Model |            | Sum of Squares | df  | Mean Square | F      | Sig.              |
|-------|------------|----------------|-----|-------------|--------|-------------------|
| 1     | Regression | 104810.160     | 1   | 104810.160  | 19.373 | .000 <sup>b</sup> |
|       | Residual   | 1233479.227    | 228 | 5409.997    |        |                   |
|       | Total      | 1338289.387    | 229 |             |        |                   |
| 2     | Regression | 285216.049     | 2   | 142608.024  | 30.741 | .000 <sup>c</sup> |
|       | Residual   | 1053073.338    | 227 | 4639.090    |        |                   |
|       | Total      | 1338289.387    | 229 |             |        |                   |
| 3     | Regression | 419880.457     | 3   | 139960.152  | 34.441 | .000 <sup>d</sup> |
|       | Residual   | 918408.931     | 226 | 4063.756    |        |                   |
|       | Total      | 1338289.387    | 229 |             |        |                   |

- a. Dependent Variable: Total\_protein\_mg\_per\_g\_dw
- b. Predictors: (Constant), Max\_Temp\_Flowering\_to\_harvest
- c. Predictors: (Constant), Max\_Temp\_Flowering\_to\_harvest, Avg\_Temp\_Flowering\_to\_harvest
- d. Predictors: (Constant), Max\_Temp\_Flowering\_to\_harvest, Avg\_Temp\_Flowering\_to\_harvest, Avg\_Rain\_Flowering\_to\_harvest

**Coefficients<sup>a</sup>**

| Model | Unstandardized Coefficients | Standardized Coefficients | t | Sig. | 95.0% Confidence Interval for B |
|-------|-----------------------------|---------------------------|---|------|---------------------------------|
|-------|-----------------------------|---------------------------|---|------|---------------------------------|

|   |                               | B       | Std. Error | Beta  |        |      | Lower Bound | Upper Bound |
|---|-------------------------------|---------|------------|-------|--------|------|-------------|-------------|
| 1 | (Constant)                    | 74.571  | 62.147     |       | 1.200  | .231 | -47.886     | 197.027     |
|   | Max_Temp_Flowering_to_harvest | 8.397   | 1.908      | .280  | 4.402  | .000 | 4.638       | 12.156      |
| 2 | (Constant)                    | 344.850 | 72.044     |       | 4.787  | .000 | 202.889     | 486.811     |
|   | Max_Temp_Flowering_to_harvest | 21.753  | 2.776      | .725  | 7.835  | .000 | 16.282      | 27.224      |
|   | Avg_Temp_Flowering_to_harvest | -31.180 | 5.000      | -.577 | -6.236 | .000 | -41.032     | -21.328     |
| 3 | (Constant)                    | 98.584  | 79.855     |       | 1.235  | .218 | -58.772     | 255.940     |
|   | Max_Temp_Flowering_to_harvest | 41.969  | 4.369      | 1.399 | 9.607  | .000 | 33.360      | 50.577      |
|   | Avg_Temp_Flowering_to_harvest | -52.222 | 5.938      | -.966 | -8.794 | .000 | -63.924     | -40.521     |
|   | Avg_Rain_Flowering_to_harvest | 1.201   | .209       | .549  | 5.757  | .000 | .790        | 1.612       |

a. Dependent Variable: Total\_protein\_mg\_per\_g\_dw

#### Excluded Variables<sup>a</sup>

| Model |                               | Beta In            | t      | Sig. | Partial Correlation | Collinearity Statistics<br>Tolerance |
|-------|-------------------------------|--------------------|--------|------|---------------------|--------------------------------------|
| 1     | Avg_Rain_Flowering_to_harvest | .033 <sup>b</sup>  | .376   | .707 | .025                | .538                                 |
|       | Min_Temp_Flowering_to_harvest | -.347 <sup>b</sup> | -3.891 | .000 | -.250               | .479                                 |

|   |                               |                    |        |      |       |      |
|---|-------------------------------|--------------------|--------|------|-------|------|
|   | Avg_Temp_Flowering_to_harvest | -.577 <sup>b</sup> | -6.236 | .000 | -.382 | .405 |
| 2 | Avg_Rain_Flowering_to_harvest | .549 <sup>c</sup>  | 5.757  | .000 | .358  | .334 |
|   | Min_Temp_Flowering_to_harvest | -.013 <sup>c</sup> | -.114  | .909 | -.008 | .283 |
| 3 | Min_Temp_Flowering_to_harvest | .049 <sup>d</sup>  | .467   | .641 | .031  | .280 |

a. Dependent Variable: Total\_protein\_mg\_per\_g\_dw

b. Predictors in the Model: (Constant), Max\_Temp\_Flowering\_to\_harvest

c. Predictors in the Model: (Constant), Max\_Temp\_Flowering\_to\_harvest, Avg\_Temp\_Flowering\_to\_harvest

d. Predictors in the Model: (Constant), Max\_Temp\_Flowering\_to\_harvest, Avg\_Temp\_Flowering\_to\_harvest, Avg\_Rain\_Flowering\_to\_harvest

#### Residuals Statistics<sup>a</sup>

|                      | Minimum    | Maximum   | Mean     | Std. Deviation | N   |
|----------------------|------------|-----------|----------|----------------|-----|
| Predicted Value      | 288.9461   | 541.9881  | 347.2791 | 42.81984       | 230 |
| Residual             | -241.26813 | 219.45865 | .00000   | 63.32866       | 230 |
| Std. Predicted Value | -1.362     | 4.547     | .000     | 1.000          | 230 |
| Std. Residual        | -3.785     | 3.443     | .000     | .993           | 230 |

a. Dependent Variable: Total\_protein\_mg\_per\_g\_dw

## Charts

### Histogram

Dependent Variable: Total\_protein\_mg\_per\_g\_dw

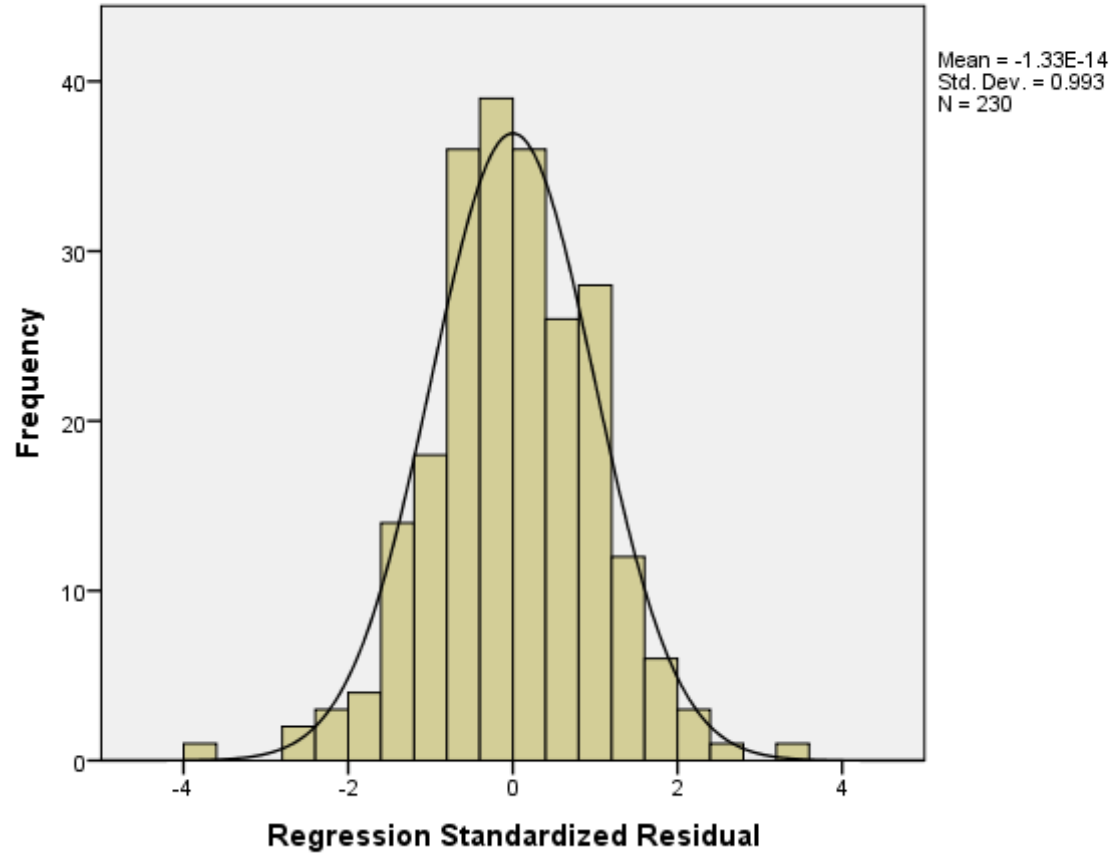

**Normal P-P Plot of Regression Standardized Residual**

**Dependent Variable: Total\_protein\_mg\_per\_g\_dw**

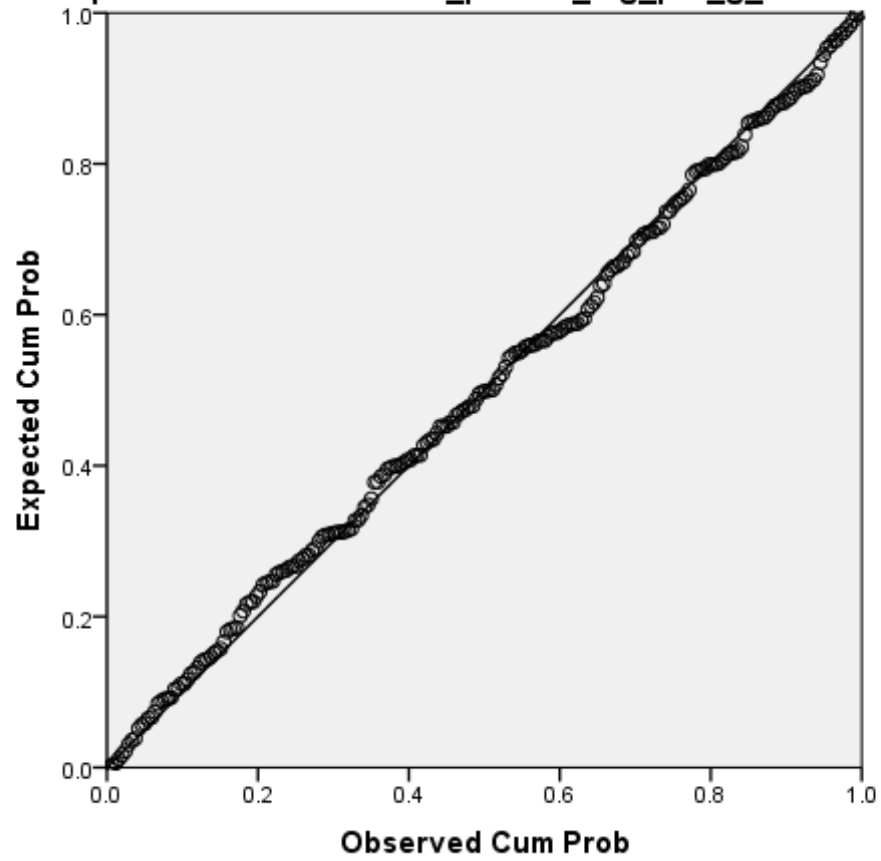

### Scatterplot

Dependent Variable: Total\_protein\_mg\_per\_g\_dw

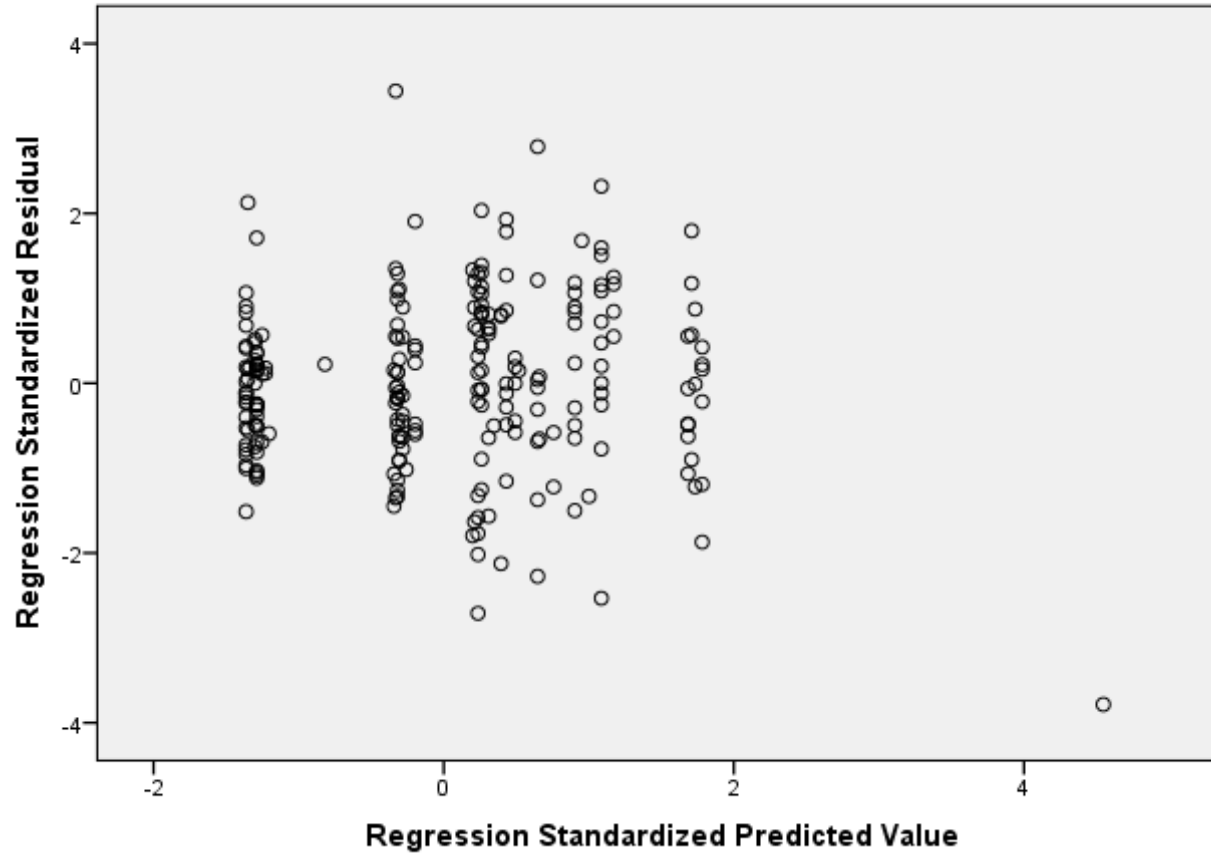

Supplement: 41598_2018_33952_MOESM2_ESM.pdf [file 41598_2018_33952_MOESM2_ESM.pdf]
